# Supplementary material for: Oxidative properties of a nonheme Ni(ii)(O2) complex: Reactivity patterns for C–H activation, aromatic hydroxylation and heteroatom oxidation
Source: Royal Society of Chemistry journal article supplement (doi:10.1039/c1cc13993b), 2011-01-01
Supplement: c1cc13993b.pdf [file c1cc13993b.pdf]

## Electronic Supporting Information

# Oxidative properties of a nonheme Ni<sup>II</sup>(O<sub>2</sub>) complex: Reactivity patterns for C–H activation, aromatic hydroxylation and heteroatom oxidation

Reza Latifi,<sup>a,b</sup> Laleh Tahsini,<sup>a,b</sup> Devesh Kumar,<sup>\*c</sup> G. Narahari Sastry,<sup>c</sup> Wonwoo Nam<sup>\*b</sup> and Sam P. de Visser<sup>\*a</sup>

Contribution from a) Manchester Interdisciplinary Biocentre and School of Chemical Engineering and Analytical Science, University of Manchester, 131 Princess Street, Manchester M1 7DN, UK. b) Department of Chemistry and Nano Science, Department of Bioinspired Science, Centre for Biomimetic Systems, Ewha Womans University, Seoul 120-750, Korea and c) Molecular Modelling Group, Indian Institute of Chemical Technology, Hyderabad 500-607, India.

Email: [sam.devisser@manchester.ac.uk](mailto:sam.devisser@manchester.ac.uk); [wwnam@ewha.ac.kr](mailto:wwnam@ewha.ac.kr); [dkclcre@yahoo.com](mailto:dkclcre@yahoo.com)

### Computational Methods.

The studies presented in this work use density functional theory (DFT) methods as implemented in the *Jaguar* and *Gaussian-03* program packages.<sup>1</sup> We use the unrestricted B3LYP density functional method<sup>2</sup> combined with a basis set (BS1) that contains LACVP on Ni and 6-31G on the rest of the atoms for geometry optimizations and frequency calculations.<sup>3</sup> Further improvement of the energetics was obtained through single point calculations using an LACV3P+ basis set on Ni and 6-311+G\* on the rest of the atoms; BS2. The geometry optimizations and frequency calculations using PPh<sub>3</sub> as a substrate were performed using basis set BS2. All local minima were characterized with real frequencies only, whereas the transition states have a single imaginary frequency for the correct mode of action. Transition states were located by running a geometry scan between two local minima by stepwise changing the reaction coordinate in a full geometry optimization with one degree of freedom fixed. The maximum point of these geometry scans was used as a starting point for the transition state optimizations and established that the transition state is indeed connected to the minima on each side of the barrier. These methods have been shown to accurately reproduce structures and free energies of activation of reaction processes of metal-oxo reactivities.<sup>4</sup> All energies reported in this work were taken from the UB3LYP/BS2 calculations and were corrected for ZPE. Test calculations with alternative density functional methods (see below) gave the same spin state ordering and only minor differences in relative energies.

To test the effect of the environment on the barrier heights we did single point calculations in a dielectric constant of  $\epsilon = 37.5$ , however, these studies only gave minor changes in relative energies and no changes in the spin state ordering and regioselectivities.

## References:

1. (a) *Jaguar* 7.0, Schrödinger, LLC.: New York NY, 2007. (b) Frisch, M. J.; Trucks, G. W.; Schlegel, H. B.; Scuseria, G. E.; Robb, M. A.; Cheeseman, J. R.; Montgomery, Jr., J. A.; Vreven, T.; Kudin, K. N.; Burant, J. C.; Millam, J. M.; Iyengar, S. S.; Tomasi, J.; Barone, V.; Mennucci, B.; Cossi, M.; Scalmani, G.; Rega N.; Petersson, G. A.; Nakatsuji, H.; Hada, M.; Ehara, M.; Toyota, K.; Fukuda, R.; Hasegawa, J.; Ishida, M.; Nakajima, T.; Honda, Y.; Kitao, O.; Nakai, N.; Klene, M.; Li, X.; Knox, J. E.; Hratchian, H. P.; Cross, J. B.; Adamo, C.; Jaramillo, J.; Gomperts, R.; Stratmann, R. E.; Yazyev, O.; Austin, A. J.; Cammi, R.; Pomelli, C.; Ochterski, J. W.; Ayala, P. Y.; Morokuma, K.; Voth, G. A.; Salvador, P.; Dannenberg, J. J.; Zakrzewski, V. G.; Dapprich, S.; Daniels, A. D.; Strain, M. C.; Farkas, O.; Malick, D. K.; Rabuck, A. D.; Raghavachari, K.; Foresman, J. B.; Ortiz, J. V.; Cui, Q.; Baboul, A. G.; Clifford, S.; Cioslowski, J.; Stefanov, B. B.; Liu, G.; Liashenko, A.; Piskorz, P.; Komaromi, I.; Martin, R. L.; Fox, D. J.; Keith, T.; Al-Laham, M. A.; Peng, C. Y.; Nanayakkara, A.; Challacombe, M.; Gill, P. M. W.; Johnson, B.; Chen, W.; Wong, M. W.; Gonzalez, C.; Pople, J. A. *Gaussian* 03, revision C.02; Gaussian, Inc., Wallingford, CT, 2004.
2. (a) Becke, A. D. *J. Chem. Phys.* **1993**, *98*, 5648–5652. (b) Lee, C.; Yang, W.; Parr, R. G. *Phys. Rev. B* **1988**, *37*, 785–789.
3. Hay, P. J.; Wadt, W. R. *J. Chem. Phys.* **1985**, *82*, 270–283.
4. (a) Kumar, D.; Karamzadeh, B.; Sastry, G. N.; de Visser, S. P. *J. Am. Chem. Soc.* **2010**, *132*, 7656–7667. (b) Kumar, D.; Thiel, W.; de Visser, S. P. *J. Am. Chem. Soc.* **2011**, *133*, 3869–3882.

**Table S1.** Absolute energies, zero-point energies, free energies of UB3LYP/BS1 optimized geometries for the reaction of  $^{2,4}\mathbf{R}_1$  with ethylbenzene (EB), xanthene (XA) and 1,4-cyclohexadiene (CHD). UB3LYP/BS2 single points and also solvent single points obtained from UB3LYP/BS2//UB3LYP/BS1.

| Substrate                 | E (BS1)<br>(au) | ZPE (BS1)<br>(kcal/mol) | G (BS1)<br>(au) | E (BS2)<br>(au) | E+Esolvent<br>(BS2) |
|---------------------------|-----------------|-------------------------|-----------------|-----------------|---------------------|
| $^4\mathbf{R}_{IEB}$      | -1401.822804    | 402.344                 | -1401.245609    | -1402.427109    | -1402.500699        |
| $^2\mathbf{R}_{IEB}$      | -1401.818900    | 402.419                 | -1401.240799    | -1402.422860    | -1402.497500        |
| $^4\mathbf{R}_{2XA}$      | -1667.517644    | 425.014                 | -1666.906231    | -1668.257425    | -1668.334683        |
| $^2\mathbf{R}_{2XA}$      | -1667.512925    | 425.082                 | -1666.900609    | -1668.252171    | -1668.330251        |
| $^4\mathbf{TS}_{IAr}$     | -1401.778050    | 401.606                 | -1401.200869    | -1402.375927    | -1402.441117        |
| $^2\mathbf{TS}_{IAr}$     | -1401.780768    | 401.712                 | -1401.203215    | -1402.378595    | -1402.443501        |
| $^4\mathbf{I}_{IAr}$      | -1401.783784    | 402.436                 | -1401.205448    | -1402.386483    | -1402.452802        |
| $^2\mathbf{I}_{IAr}$      | -1401.783369    | 402.504                 | -1401.203126    | -1402.386113    | -1402.452234        |
| $^4\mathbf{TS}_{IHA,EB}$  | -1401.785000    | 398.572                 | -1401.209660    | -1402.382532    | -1402.453020        |
| $^4\mathbf{TS}_{IHA,XA}$  | -1667.480590    | 421.496                 | -1666.871889    | -1668.210874    | -1668.284460        |
| $^4\mathbf{TS}_{2HA,XA}$  | -1667.489415    | 421.508                 | -1666.880590    | -1668.222933    | -1668.296490        |
| $^4\mathbf{TS}_{IHA,CHD}$ | -1324.349079    | 376.811                 | -1323.808732    | -1324.916136    | -1324.987709        |
| $^2\mathbf{TS}_{IHA,EB}$  | -1401.786772    | 398.661                 | -1401.210547    | -1402.384058    | -1402.450293        |
| $^2\mathbf{TS}_{IHA,XA}$  | -1667.481956    | 421.604                 | -1666.872509    | -1668.211635    | -1668.283127        |
| $^2\mathbf{TS}_{2HA,XA}$  | -1667.489410    | 421.516                 | -1666.880241    | -1668.222790    | -1668.296212        |
| $^2\mathbf{TS}_{IHA,CHD}$ | -1324.350202    | 376.842                 | -1323.809203    | -1324.916977    | -1324.985976        |
| $^4\mathbf{I}_{IHA,EB}$   | -1401.799447    | 400.718                 | -1401.224250    | -1402.402400    | -1402.471397        |
| $^4\mathbf{I}_{IHA,XA}$   | -1667.501301    | 423.979                 | -1666.891213    | -1668.237026    | -1668.310894        |
| $^4\mathbf{I}_{IHA,CHD}$  | -1324.373889    | 379.095                 | -1323.833146    | -1324.945781    | -1325.015740        |
| $^2\mathbf{I}_{IHA,EB}$   | -1401.799354    | 400.871                 | -1401.222084    | -1402.401882    | -1402.470247        |
| $^2\mathbf{I}_{IHA,XA}$   | -1667.501891    | 423.985                 | -1666.891665    | -1668.237984    | -1668.308946        |
| $^2\mathbf{I}_{IHA,CHD}$  | -1324.373942    | 379.064                 | -1323.832618    | -1324.945665    | -1325.015540        |

**Table S2.** Relative energies of UB3LYP/BS1 optimized geometries for the reaction of  $^{2,4}\mathbf{R}_1$  with ethylbenzene, xanthene and 1,4-cyclohexadiene. UB3LYP/BS2 single points and also solvent single points obtained from UB3LYP/BS2//UB3LYP/BS1.

|                                  | $\Delta E$ | $\Delta E$ | $\Delta E+ZPE$ | $\Delta E+ZPE$ | $\Delta G$ | $\Delta G$ | $\Delta E_{\text{Solvent}}$ | $\Delta(E_{\text{Solvent}}+ZPE)$ | $\Delta G+E_{\text{Solvent}}$ |
|----------------------------------|------------|------------|----------------|----------------|------------|------------|-----------------------------|----------------------------------|-------------------------------|
|                                  | (BS1)      | (BS2)      | (BS1)          | (BS2)          | (BS1)      | (BS2)      | (BS2)                       | (BS2)                            | (BS2)                         |
| $^4\mathbf{R}_{1\text{EB}}$      | 0.00       | 0.00       | 0.00           | 0.00           | 0.00       | 0.00       | 0.00                        | 0.00                             | 0.00                          |
| $^2\mathbf{R}_{1\text{EB}}$      | 2.45       | 2.67       | 2.52           | 2.74           | 3.02       | 3.23       | 2.01                        | 2.52                             | 2.58                          |
| $^4\mathbf{R}_{2\text{XA}}$      | 0.00       | 0.00       | 0.00           | 0.00           | 0.00       | 0.00       | 0.00                        | 0.00                             | 0.00                          |
| $^2\mathbf{R}_{2\text{XA}}$      | 2.96       | 3.30       | 3.03           | 3.36           | 3.53       | 3.86       | 2.78                        | 3.03                             | 3.35                          |
| $^4\mathbf{TS}_{1\text{Ar}}$     | 28.08      | 32.12      | 27.35          | 31.38          | 28.07      | 32.11      | 37.39                       | 27.35                            | 37.38                         |
| $^2\mathbf{TS}_{1\text{Ar}}$     | 26.38      | 30.44      | 25.75          | 29.81          | 26.60      | 30.67      | 35.89                       | 25.75                            | 36.12                         |
| $^4\mathbf{I}_{1\text{Ar}}$      | 24.49      | 25.49      | 24.58          | 25.58          | 25.20      | 26.21      | 30.06                       | 24.58                            | 30.77                         |
| $^2\mathbf{I}_{1\text{Ar}}$      | 24.75      | 25.73      | 24.91          | 25.89          | 26.66      | 27.64      | 30.41                       | 24.91                            | 32.32                         |
| $^4\mathbf{TS}_{1\text{HA,EB}}$  | 23.72      | 27.97      | 19.95          | 24.20          | 22.56      | 26.81      | 29.92                       | 19.95                            | 28.75                         |
| $^4\mathbf{TS}_{1\text{HA,XA}}$  | 16.99      | 21.22      | 13.47          | 17.69          | 14.42      | 18.65      | 24.62                       | 13.47                            | 22.05                         |
| $^4\mathbf{TS}_{2\text{HA,XA}}$  | 11.21      | 17.29      | 8.21           | 14.29          | 22.84      | 28.92      | 27.92                       | 8.21                             | 39.55                         |
| $^4\mathbf{TS}_{1\text{HA,CHD}}$ | 17.76      | 22.02      | 14.16          | 18.41          | 16.04      | 20.30      | 24.07                       | 14.16                            | 22.36                         |
| $^2\mathbf{TS}_{1\text{HA,EB}}$  | 22.61      | 27.01      | 18.93          | 23.33          | 22.00      | 26.41      | 31.63                       | 18.93                            | 31.02                         |
| $^2\mathbf{TS}_{1\text{HA,XA}}$  | 16.13      | 20.74      | 12.72          | 17.32          | 14.03      | 18.64      | 25.45                       | 12.72                            | 23.35                         |
| $^2\mathbf{TS}_{2\text{HA,XA}}$  | 11.22      | 17.38      | 8.22           | 14.39          | 23.06      | 29.22      | 28.10                       | 8.22                             | 39.94                         |
| $^2\mathbf{TS}_{1\text{HA,CHD}}$ | 17.05      | 21.49      | 13.48          | 17.92          | 15.74      | 20.18      | 25.16                       | 13.48                            | 23.85                         |
| $^4\mathbf{I}_{1\text{HA,EB}}$   | 14.66      | 15.50      | 13.03          | 13.88          | 13.40      | 14.25      | 18.39                       | 13.03                            | 17.13                         |
| $^4\mathbf{I}_{1\text{HA,XA}}$   | 3.99       | 4.80       | 2.96           | 3.77           | 2.29       | 3.11       | 8.03                        | 2.96                             | 6.33                          |
| $^4\mathbf{I}_{1\text{HA,CHD}}$  | 2.19       | 3.41       | 0.87           | 2.10           | 0.72       | 1.94       | 6.48                        | 0.87                             | 5.01                          |
| $^2\mathbf{I}_{1\text{HA,EB}}$   | 14.71      | 15.83      | 13.24          | 14.36          | 14.76      | 15.88      | 19.11                       | 13.24                            | 19.16                         |
| $^2\mathbf{I}_{1\text{HA,XA}}$   | 3.62       | 4.20       | 2.59           | 3.17           | 2.01       | 2.59       | 9.25                        | 2.59                             | 7.64                          |
| $^2\mathbf{I}_{1\text{HA,CHD}}$  | 2.16       | 3.49       | 0.81           | 2.14           | 1.05       | 2.38       | 6.61                        | 0.81                             | 5.51                          |

**Table S3.** Group spin densities and charges of UB3LYP/BS1 optimized geometries for the reaction of  $^{2,4}R_1$  with ethylbenzene, xanthene and 1,4-cyclohexadiene.

**(a) Group spin densities.**

|                  | $\rho_{Ni}$ | $\rho_{O1}$ | $\rho_{O2}$ | $\rho_{TMC}$ | $\rho_{SubH}$ | $\rho_{Total}$ |
|------------------|-------------|-------------|-------------|--------------|---------------|----------------|
| $^4R_{1EB}$      | 1.49        | 0.59        | 0.68        | 0.25         | 0.00          | 3.00           |
| $^2R_{1EB}$      | 1.54        | -0.22       | -0.57       | 0.25         | 0.00          | 1.00           |
| $^4R_{2XA}$      | 1.47        | 0.60        | 0.71        | 0.22         | 0.00          | 3.00           |
| $^2R_{2XA}$      | 1.53        | -0.18       | -0.57       | 0.23         | 0.00          | 1.00           |
| $^4TS_{1Ar}$     | 1.57        | 0.21        | 0.34        | 0.25         | 0.62          | 3.00           |
| $^2TS_{1Ar}$     | 1.55        | 0.15        | -0.32       | 0.23         | -0.61         | 1.00           |
| $^4I_{1Ar}$      | 1.58        | 0.19        | 0.06        | 0.26         | 0.92          | 3.00           |
| $^2I_{1Ar}$      | 1.57        | 0.16        | -0.09       | 0.24         | -0.89         | 1.00           |
|                  | $\rho_{Ni}$ | $\rho_{O1}$ | $\rho_{OH}$ | $\rho_{TMC}$ | $\rho_{Sub.}$ | $\rho_{Total}$ |
| $^4TS_{1HA,EB}$  | 1.54        | 0.29        | 0.32        | 0.24         | 0.61          | 3.00           |
| $^4TS_{1HA,XA}$  | 1.53        | 0.33        | 0.32        | 0.24         | 0.59          | 3.00           |
| $^4TS_{2HA,XA}$  | 1.51        | 0.35        | 0.34        | 0.21         | 0.58          | 3.00           |
| $^4TS_{1HA,CHD}$ | 1.53        | 0.32        | 0.35        | 0.23         | 0.57          | 3.00           |
| $^2TS_{1HA,EB}$  | 1.55        | 0.10        | -0.29       | 0.24         | -0.60         | 1.00           |
| $^2TS_{1HA,XA}$  | 1.54        | 0.07        | -0.29       | 0.24         | -0.56         | 1.00           |
| $^2TS_{2HA,XA}$  | 1.53        | 0.09        | -0.28       | 0.21         | -0.56         | 1.00           |
| $^2TS_{1HA,CHD}$ | 1.54        | 0.07        | -0.31       | 0.24         | -0.54         | 1.00           |
| $^4I_{1HA,EB}$   | 1.57        | 0.19        | 0.02        | 0.25         | 0.98          | 3.00           |
| $^4I_{1HA,XA}$   | 1.57        | 0.18        | 0.01        | 0.25         | 0.99          | 3.00           |
| $^4I_{1HA,CHD}$  | 1.57        | 0.18        | 0.02        | 0.25         | 0.98          | 3.00           |
| $^2I_{1HA,EB}$   | 1.57        | 0.18        | -0.04       | 0.25         | -0.96         | 1.00           |
| $^2I_{1HA,XA}$   | 1.57        | 0.18        | -0.02       | 0.25         | -0.99         | 1.00           |
| $^2I_{1HA,CHD}$  | 1.57        | 0.18        | -0.03       | 0.25         | -0.98         | 1.00           |

**(b) Charges**

|                 | $Q_{Ni}$ | $Q_{O1}$ | $Q_{O2}$ | $Q_{TMC}$ | $Q_{SubH}$ | $Q_{Total}$ |
|-----------------|----------|----------|----------|-----------|------------|-------------|
| $^4R_{1EB}$     | 0.52     | -0.29    | -0.18    | 0.93      | 0.02       | 1.00        |
| $^2R_{1EB}$     | 0.54     | -0.31    | -0.19    | 0.95      | 0.01       | 1.00        |
| $^4R_{2XA}$     | 0.53     | -0.28    | -0.18    | 0.90      | 0.03       | 1.00        |
| $^2R_{2XA}$     | 0.55     | -0.31    | -0.19    | 0.92      | 0.03       | 1.00        |
| $^4TS_{1Ar}$    | 0.54     | -0.44    | -0.29    | 0.88      | 0.31       | 1.00        |
| $^2TS_{1Ar}$    | 0.53     | -0.43    | -0.29    | 0.87      | 0.31       | 1.00        |
| $^4I_{1Ar}$     | 0.54     | -0.43    | -0.34    | 0.90      | 0.34       | 1.00        |
| $^2I_{1Ar}$     | 0.54     | -0.44    | -0.34    | 0.89      | 0.34       | 1.00        |
|                 | $Q_{Ni}$ | $Q_{O1}$ | $Q_{OH}$ | $Q_{TMC}$ | $Q_{Sub.}$ | $Q_{Total}$ |
| $^4TS_{1HA,EB}$ | 0.53     | -0.40    | -0.01    | 0.88      | -0.01      | 1.00        |

|                                    |      |       |       |      |       |      |
|------------------------------------|------|-------|-------|------|-------|------|
| <sup>4</sup> TS <sub>IHA,XA</sub>  | 0.53 | -0.39 | 0.01  | 0.89 | -0.03 | 1.00 |
| <sup>4</sup> TS <sub>IHA,CHD</sub> | 0.53 | -0.39 | -0.01 | 0.88 | -0.01 | 1.00 |
| <sup>4</sup> TS <sub>2HA,CHD</sub> | 0.53 | -0.38 | 0.02  | 0.87 | -0.04 | 1.00 |
| <sup>2</sup> TS <sub>IHA,EB</sub>  | 0.53 | -0.41 | -0.01 | 0.89 | 0.01  | 1.00 |
| <sup>2</sup> TS <sub>IHA,XA</sub>  | 0.53 | -0.40 | 0.00  | 0.89 | -0.02 | 1.00 |
| <sup>2</sup> TS <sub>2HA,XA</sub>  | 0.53 | -0.39 | 0.01  | 0.88 | -0.03 | 1.00 |
| <sup>2</sup> TS <sub>IHA,CHD</sub> | 0.53 | -0.40 | -0.01 | 0.89 | -0.01 | 1.00 |
| <sup>4</sup> I <sub>IHA,EB</sub>   | 0.54 | -0.43 | -0.05 | 0.89 | 0.06  | 1.00 |
| <sup>4</sup> I <sub>IHA,XA</sub>   | 0.54 | -0.43 | -0.05 | 0.89 | 0.06  | 1.00 |
| <sup>4</sup> I <sub>IHA,CHD</sub>  | 0.54 | -0.44 | -0.05 | 0.89 | 0.06  | 1.00 |
| <sup>2</sup> I <sub>IHA,EB</sub>   | 0.54 | -0.44 | -0.05 | 0.89 | 0.06  | 1.00 |
| <sup>2</sup> I <sub>IHA,XA</sub>   | 0.54 | -0.44 | -0.05 | 0.89 | 0.06  | 1.00 |
| <sup>2</sup> I <sub>IHA,CHD</sub>  | 0.54 | -0.44 | -0.05 | 0.89 | 0.06  | 1.00 |

**Table S4.** Group spin densities and charges of UB3LYP/BS2 single points on UB3LYP/BS1 optimized geometries for the reaction of  $^{2,4}\mathbf{R}_1$  with ethylbenzene, xanthene and 1,4-cyclohexadiene.

**(a) Group spin densities.**

|                                  | $\rho_{\text{Ni}}$ | $\rho_{\text{O1}}$ | $\rho_{\text{O2}}$ | $\rho_{\text{TMC}}$ | $\rho_{\text{SubH}}$ | $\rho_{\text{Total}}$ |
|----------------------------------|--------------------|--------------------|--------------------|---------------------|----------------------|-----------------------|
| $^4\mathbf{R}_{\text{IEB}}$      | 1.54               | 0.57               | 0.68               | 0.21                | 0.00                 | 3.00                  |
| $^2\mathbf{R}_{\text{IEB}}$      | 1.59               | -0.22              | -0.58              | 0.21                | 0.00                 | 1.00                  |
| $^4\mathbf{R}_{2\text{XA}}$      | 1.51               | 0.58               | 0.70               | 0.21                | 0.00                 | 3.00                  |
| $^2\mathbf{R}_{2\text{XA}}$      | 1.58               | -0.19              | -0.58              | 0.19                | 0.00                 | 1.00                  |
| $^4\mathbf{TS}_{\text{IAr}}$     | 1.63               | 0.19               | 0.31               | 0.21                | 0.67                 | 3.00                  |
| $^2\mathbf{TS}_{\text{IAr}}$     | 1.61               | 0.15               | -0.29              | 0.19                | -0.66                | 1.00                  |
| $^4\mathbf{I}_{\text{IAr}}$      | 1.63               | 0.17               | 0.04               | 0.22                | 0.95                 | 3.00                  |
| $^2\mathbf{I}_{\text{IAr}}$      | 1.61               | 0.16               | -0.06              | 0.21                | -0.92                | 1.00                  |
|                                  | $\rho_{\text{Ni}}$ | $\rho_{\text{O1}}$ | $\rho_{\text{OH}}$ | $\rho_{\text{TMC}}$ | $\rho_{\text{Sub.}}$ | $\rho_{\text{Total}}$ |
| $^4\mathbf{TS}_{\text{IHA,EB}}$  | 1.59               | 0.26               | 0.31               | 0.21                | 0.63                 | 3.00                  |
| $^4\mathbf{TS}_{\text{IHA,XA}}$  | 1.58               | 0.30               | 0.31               | 0.21                | 0.60                 | 3.00                  |
| $^4\mathbf{TS}_{2\text{HA,XA}}$  | 1.57               | 0.32               | 0.32               | 0.19                | 0.60                 | 3.00                  |
| $^4\mathbf{TS}_{\text{IHA,CHD}}$ | 1.58               | 0.30               | 0.33               | 0.21                | 0.58                 | 3.00                  |
| $^2\mathbf{TS}_{\text{IHA,EB}}$  | 1.60               | 0.10               | -0.29              | 0.20                | -0.62                | 1.00                  |
| $^2\mathbf{TS}_{\text{IHA,XA}}$  | 1.59               | 0.07               | -0.29              | 0.21                | -0.57                | 1.00                  |
| $^2\mathbf{TS}_{2\text{HA,XA}}$  | 1.59               | 0.09               | -0.28              | 0.18                | -0.57                | 1.00                  |
| $^2\mathbf{TS}_{\text{IHA,CHD}}$ | 1.59               | 0.06               | -0.31              | 0.21                | -0.55                | 1.00                  |
| $^4\mathbf{I}_{\text{IHA,EB}}$   | 1.62               | 0.17               | 0.01               | 0.21                | 0.99                 | 3.00                  |
| $^4\mathbf{I}_{\text{IHA,XA}}$   | 1.62               | 0.16               | 0.00               | 0.22                | 1.00                 | 3.00                  |
| $^4\mathbf{I}_{\text{IHA,CHD}}$  | 1.62               | 0.16               | 0.01               | 0.22                | 0.99                 | 3.00                  |
| $^2\mathbf{I}_{\text{IHA,EB}}$   | 1.62               | 0.17               | -0.02              | 0.21                | -0.98                | 1.00                  |
| $^2\mathbf{I}_{\text{IHA,XA}}$   | 1.62               | 0.17               | -0.01              | 0.22                | -0.99                | 1.00                  |
| $^2\mathbf{I}_{\text{IHA,CHD}}$  | 1.62               | 0.17               | -0.02              | 0.21                | -0.99                | 1.00                  |

**(b) Charges**

|                                 | $Q_{\text{Ni}}$ | $Q_{\text{O1}}$ | $Q_{\text{O2}}$ | $Q_{\text{TMC}}$ | $Q_{\text{SubH}}$ | $Q_{\text{Total}}$ |
|---------------------------------|-----------------|-----------------|-----------------|------------------|-------------------|--------------------|
| $^4\mathbf{R}_{\text{IEB}}$     | 0.40            | -0.12           | -0.12           | 0.88             | -0.04             | 1.00               |
| $^2\mathbf{R}_{\text{IEB}}$     | 0.39            | -0.14           | -0.13           | 0.91             | -0.03             | 1.00               |
| $^4\mathbf{R}_{2\text{XA}}$     | 0.46            | -0.09           | -0.12           | 0.73             | 0.02              | 1.00               |
| $^2\mathbf{R}_{2\text{XA}}$     | 0.46            | -0.12           | -0.12           | 0.77             | 0.02              | 1.00               |
| $^4\mathbf{TS}_{\text{IAr}}$    | 0.39            | -0.28           | 0.00            | 0.83             | 0.06              | 1.00               |
| $^2\mathbf{TS}_{\text{IAr}}$    | 0.38            | -0.28           | 0.00            | 0.84             | 0.06              | 1.00               |
| $^4\mathbf{I}_{\text{IAr}}$     | 0.45            | -0.32           | -0.02           | 0.84             | 0.05              | 1.00               |
| $^2\mathbf{I}_{\text{IAr}}$     | 0.48            | -0.34           | -0.04           | 0.82             | 0.07              | 1.00               |
|                                 | $Q_{\text{Ni}}$ | $Q_{\text{O1}}$ | $Q_{\text{OH}}$ | $Q_{\text{TMC}}$ | $Q_{\text{Sub.}}$ | $Q_{\text{Total}}$ |
| $^4\mathbf{TS}_{\text{IHA,EB}}$ | 0.45            | -0.27           | 0.16            | 0.84             | -0.18             | 1.00               |

|                                    |      |       |      |      |       |      |
|------------------------------------|------|-------|------|------|-------|------|
| <sup>4</sup> TS <sub>IHA,XA</sub>  | 0.49 | -0.25 | 0.13 | 0.87 | -0.24 | 1.00 |
| <sup>4</sup> TS <sub>2HA,XA</sub>  | 0.45 | -0.13 | 0.19 | 0.72 | -0.24 | 1.00 |
| <sup>4</sup> TS <sub>IHA,CHD</sub> | 0.42 | -0.22 | 0.06 | 0.90 | -0.16 | 1.00 |
| <sup>2</sup> TS <sub>IHA,EB</sub>  | 0.32 | -0.21 | 0.12 | 0.97 | -0.21 | 1.00 |
| <sup>2</sup> TS <sub>2HA,EB</sub>  | 0.43 | -0.12 | 0.19 | 0.73 | -0.24 | 1.00 |
| <sup>2</sup> TS <sub>IHA,XA</sub>  | 0.39 | -0.18 | 0.13 | 0.88 | -0.22 | 1.00 |
| <sup>2</sup> TS <sub>IHA,CHD</sub> | 0.41 | -0.24 | 0.08 | 0.91 | -0.16 | 1.00 |
| <sup>4</sup> I <sub>IHA,EB</sub>   | 0.41 | -0.32 | 0.10 | 0.91 | -0.10 | 1.00 |
| <sup>4</sup> I <sub>IHA,XA</sub>   | 0.45 | -0.32 | 0.01 | 0.94 | -0.08 | 1.00 |
| <sup>4</sup> I <sub>IHA,CHD</sub>  | 0.45 | -0.34 | 0.01 | 0.93 | -0.05 | 1.00 |
| <sup>2</sup> I <sub>IHA,EB</sub>   | 0.43 | -0.34 | 0.04 | 0.99 | -0.12 | 1.00 |
| <sup>2</sup> I <sub>IHA,XA</sub>   | 0.41 | -0.34 | 0.05 | 0.99 | -0.11 | 1.00 |
| <sup>2</sup> I <sub>IHA,CHD</sub>  | 0.44 | -0.34 | 0.02 | 0.93 | -0.05 | 1.00 |



**Table S5.** Group spin densities and charges of UB3LYP/BS2 solvent single points on UB3LYP/BS1 optimized geometries for the reaction of  $^{2,4}\mathbf{R}_1$  with ethylbenzene, xanthene and 1,4-cyclohexadiene.

**(a) Group spin densities.**

|                                  | $\rho_{\text{Ni}}$ | $\rho_{\text{O1}}$ | $\rho_{\text{O2}}$ | $\rho_{\text{TMC}}$ | $\rho_{\text{SubH}}$ | $\rho_{\text{Total}}$ |
|----------------------------------|--------------------|--------------------|--------------------|---------------------|----------------------|-----------------------|
| $^4\mathbf{R}_{\text{IEB}}$      | 1.57               | 0.56               | 0.63               | 0.24                | 0.00                 | 3.00                  |
| $^2\mathbf{R}_{\text{IEB}}$      | 1.62               | -0.28              | -0.57              | 0.23                | 0.00                 | 1.00                  |
| $^4\mathbf{R}_{2\text{XA}}$      | 1.56               | 0.56               | 0.64               | 0.24                | 0.00                 | 3.00                  |
| $^2\mathbf{R}_{2\text{XA}}$      | 1.62               | -0.25              | -0.58              | 0.22                | 0.00                 | 1.00                  |
| $^4\mathbf{TS}_{1\text{Ar}}$     | 1.64               | 0.17               | 0.33               | 0.22                | 0.63                 | 3.00                  |
| $^2\mathbf{TS}_{1\text{Ar}}$     | 1.63               | 0.11               | -0.32              | 0.20                | -0.63                | 1.00                  |
| $^4\mathbf{I}_{1\text{Ar}}$      | 1.64               | 0.14               | 0.05               | 0.23                | 0.95                 | 3.00                  |
| $^2\mathbf{I}_{1\text{Ar}}$      | 1.62               | 0.15               | -0.07              | 0.22                | -0.92                | 1.00                  |
|                                  | $\rho_{\text{Ni}}$ | $\rho_{\text{O1}}$ | $\rho_{\text{OH}}$ | $\rho_{\text{TMC}}$ | $\rho_{\text{Sub.}}$ | $\rho_{\text{Total}}$ |
| $^4\mathbf{TS}_{\text{IHA,EB}}$  | 1.62               | 0.24               | 0.30               | 0.23                | 0.61                 | 3.00                  |
| $^4\mathbf{TS}_{\text{IHA,XA}}$  | 1.61               | 0.29               | 0.30               | 0.24                | 0.56                 | 3.00                  |
| $^4\mathbf{TS}_{2\text{HA,XA}}$  | 1.61               | 0.31               | 0.31               | 0.22                | 0.55                 | 3.00                  |
| $^4\mathbf{TS}_{\text{IHA,CHD}}$ | 1.61               | 0.28               | 0.31               | 0.24                | 0.56                 | 3.00                  |
| $^2\mathbf{TS}_{\text{IHA,EB}}$  | 1.62               | 0.05               | -0.29              | 0.21                | -0.59                | 1.00                  |
| $^2\mathbf{TS}_{\text{IHA,XA}}$  | 1.61               | 0.00               | -0.30              | 0.22                | -0.53                | 1.00                  |
| $^2\mathbf{TS}_{2\text{HA,XA}}$  | 1.62               | 0.01               | -0.30              | 0.20                | -0.53                | 1.00                  |
| $^2\mathbf{TS}_{\text{IHA,CHD}}$ | 1.61               | 0.01               | -0.32              | 0.22                | -0.52                | 1.00                  |
| $^4\mathbf{I}_{\text{IHA,EB}}$   | 1.64               | 0.14               | 0.01               | 0.22                | 0.99                 | 3.00                  |
| $^4\mathbf{I}_{\text{IHA,XA}}$   | 1.63               | 0.14               | 0.00               | 0.23                | 1.00                 | 3.00                  |
| $^4\mathbf{I}_{\text{IHA,CHD}}$  | 1.63               | 0.14               | 0.01               | 0.23                | 0.99                 | 3.00                  |
| $^2\mathbf{I}_{\text{IHA,EB}}$   | 1.63               | 0.14               | -0.02              | 0.22                | -0.98                | 1.00                  |
| $^2\mathbf{I}_{\text{IHA,XA}}$   | 1.63               | 0.14               | -0.01              | 0.23                | -0.99                | 1.00                  |
| $^2\mathbf{I}_{\text{IHA,CHD}}$  | 1.64               | 0.14               | -0.01              | 0.23                | -0.99                | 1.00                  |

**(b) Charges**

|                                 | $Q_{\text{Ni}}$ | $Q_{\text{O1}}$ | $Q_{\text{O2}}$ | $Q_{\text{TMC}}$ | $Q_{\text{SubH}}$ | $Q_{\text{Total}}$ |
|---------------------------------|-----------------|-----------------|-----------------|------------------|-------------------|--------------------|
| $^4\mathbf{R}_{\text{IEB}}$     | 0.41            | -0.14           | -0.20           | 0.96             | -0.03             | 1.00               |
| $^2\mathbf{R}_{\text{IEB}}$     | 0.41            | -0.16           | -0.21           | 0.98             | -0.03             | 1.00               |
| $^4\mathbf{R}_{2\text{XA}}$     | 0.49            | -0.13           | -0.21           | 0.83             | 0.01              | 1.00               |
| $^2\mathbf{R}_{2\text{XA}}$     | 0.50            | -0.15           | -0.21           | 0.85             | 0.01              | 1.00               |
| $^4\mathbf{TS}_{1\text{Ar}}$    | 0.41            | -0.30           | 0.02            | 0.87             | 0.00              | 1.00               |
| $^2\mathbf{TS}_{1\text{Ar}}$    | 0.40            | -0.30           | 0.02            | 0.89             | -0.01             | 1.00               |
| $^4\mathbf{I}_{1\text{Ar}}$     | 0.47            | -0.34           | -0.02           | 0.88             | 0.01              | 1.00               |
| $^2\mathbf{I}_{1\text{Ar}}$     | 0.50            | -0.36           | -0.03           | 0.85             | 0.04              | 1.00               |
|                                 | $Q_{\text{Ni}}$ | $Q_{\text{O1}}$ | $Q_{\text{OH}}$ | $Q_{\text{TMC}}$ | $Q_{\text{Sub.}}$ | $Q_{\text{Total}}$ |
| $^4\mathbf{TS}_{\text{IHA,EB}}$ | 0.47            | -0.33           | 0.13            | 0.93             | -0.19             | 1.00               |

|                                    |      |       |       |      |       |      |
|------------------------------------|------|-------|-------|------|-------|------|
| <sup>4</sup> TS <sub>IHA,XA</sub>  | 0.51 | -0.29 | 0.09  | 0.96 | -0.26 | 1.00 |
| <sup>4</sup> TS <sub>2HA,XA</sub>  | 0.47 | -0.15 | 0.13  | 0.81 | -0.27 | 1.00 |
| <sup>4</sup> TS <sub>IHA,CHD</sub> | 0.45 | -0.27 | 0.01  | 0.98 | -0.17 | 1.00 |
| <sup>2</sup> TS <sub>IHA,EB</sub>  | 0.34 | -0.20 | 0.10  | 1.01 | -0.24 | 1.00 |
| <sup>2</sup> TS <sub>IHA,XA</sub>  | 0.40 | -0.17 | 0.09  | 0.95 | -0.27 | 1.00 |
| <sup>2</sup> TS <sub>2HA,XA</sub>  | 0.46 | -0.13 | 0.14  | 0.81 | -0.28 | 1.00 |
| <sup>2</sup> TS <sub>IHA,CHD</sub> | 0.43 | -0.24 | 0.04  | 0.97 | -0.19 | 1.00 |
| <sup>4</sup> I <sub>IHA,EB</sub>   | 0.45 | -0.39 | 0.07  | 0.96 | -0.09 | 1.00 |
| <sup>4</sup> I <sub>IHA,XA</sub>   | 0.48 | -0.38 | -0.03 | 1.00 | -0.08 | 1.00 |
| <sup>4</sup> I <sub>IHA,CHD</sub>  | 0.49 | -0.38 | -0.05 | 0.98 | -0.04 | 1.00 |
| <sup>2</sup> I <sub>IHA,EB</sub>   | 0.45 | -0.34 | -0.01 | 1.02 | -0.11 | 1.00 |
| <sup>2</sup> I <sub>IHA,XA</sub>   | 0.43 | -0.36 | 0.01  | 1.02 | -0.10 | 1.00 |
| <sup>2</sup> I <sub>IHA,CHD</sub>  | 0.48 | -0.38 | -0.04 | 0.98 | -0.05 | 1.00 |

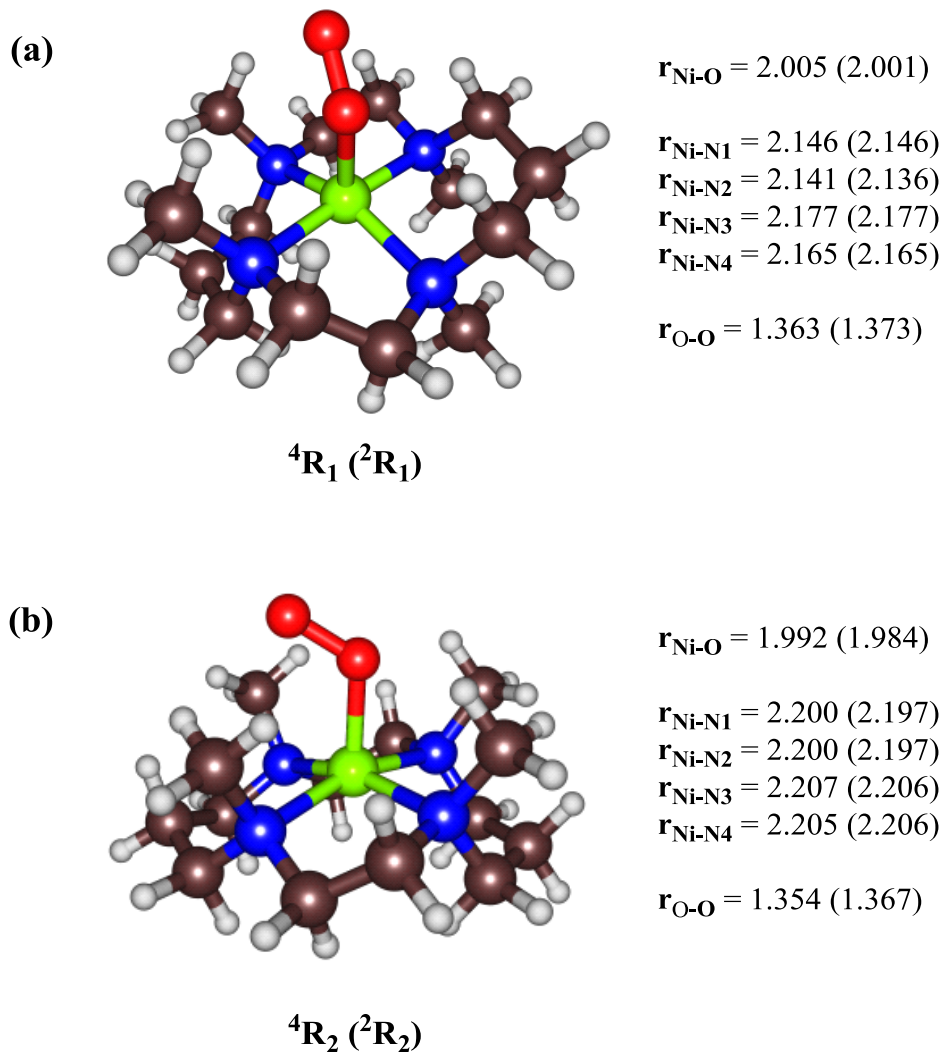

**Figure S1.** Optimized geometries of (a)- ${}^4\mathbf{R}_1$  and (b)- ${}^4\mathbf{R}_2$  as obtained at UB3LYP/BS1 in Jaguar. Bond lengths are in angstroms.

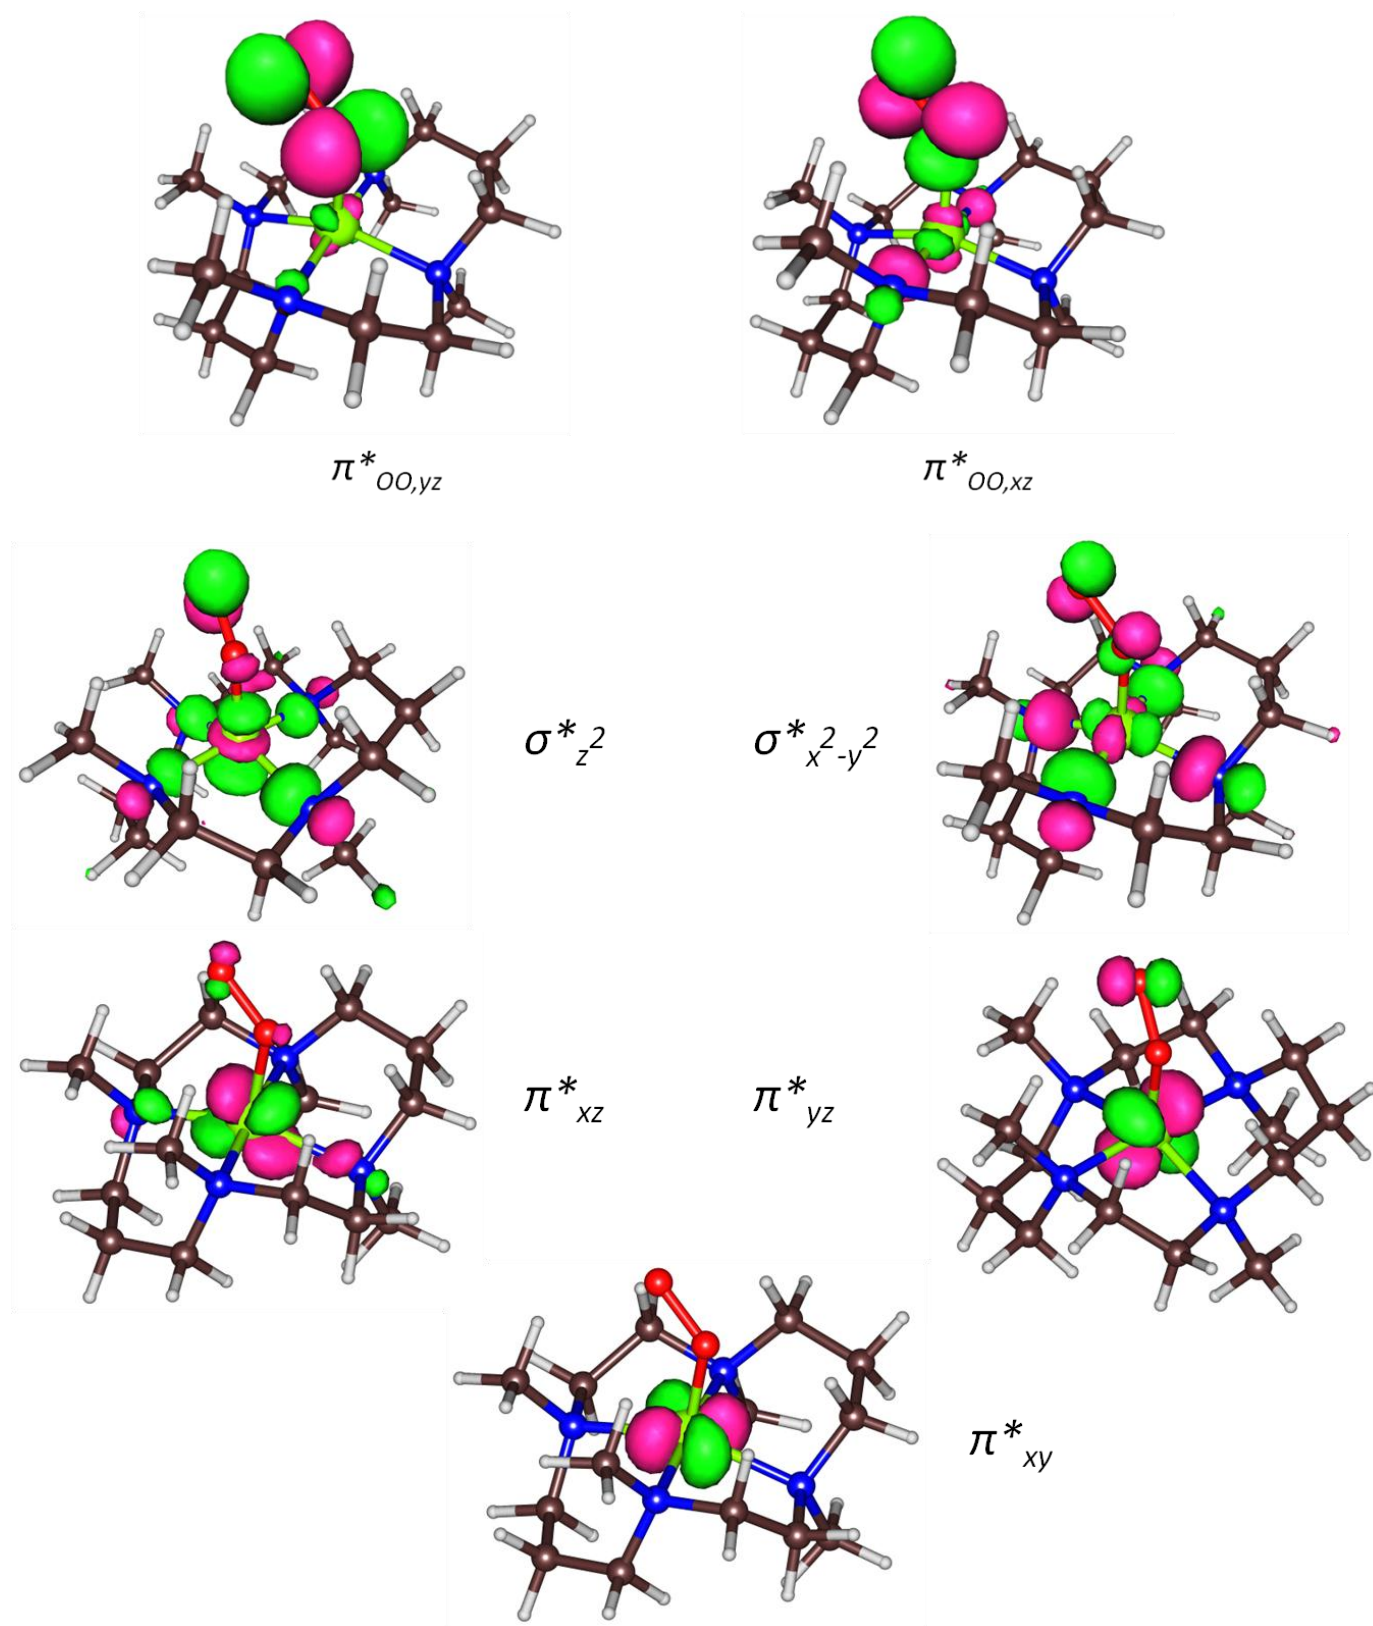

**Figure S2.** Molecular orbital of  $^{4,2}\text{NiOO}(\text{TMC})$  as obtained at UB3LYP/BS1 in Jaguar.

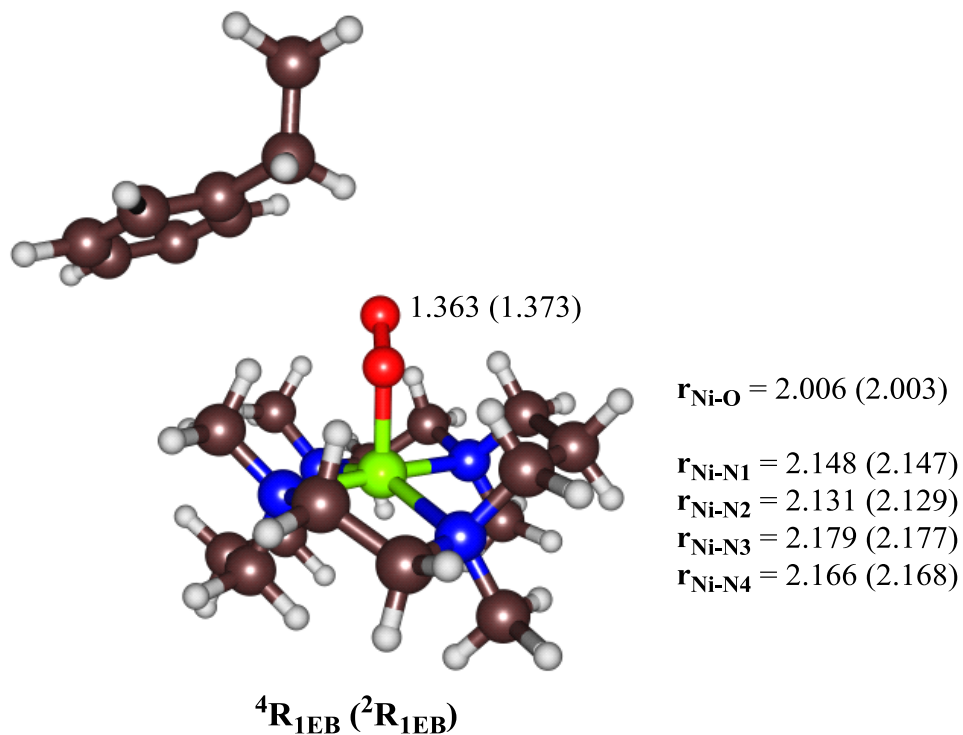

**Figure S3.** Optimized geometries of  ${}^{4,2}\mathbf{R}_{1\text{EB}}$  and as obtained at UB3LYP/BS1 in Jaguar. Bond lengths are in angstroms.

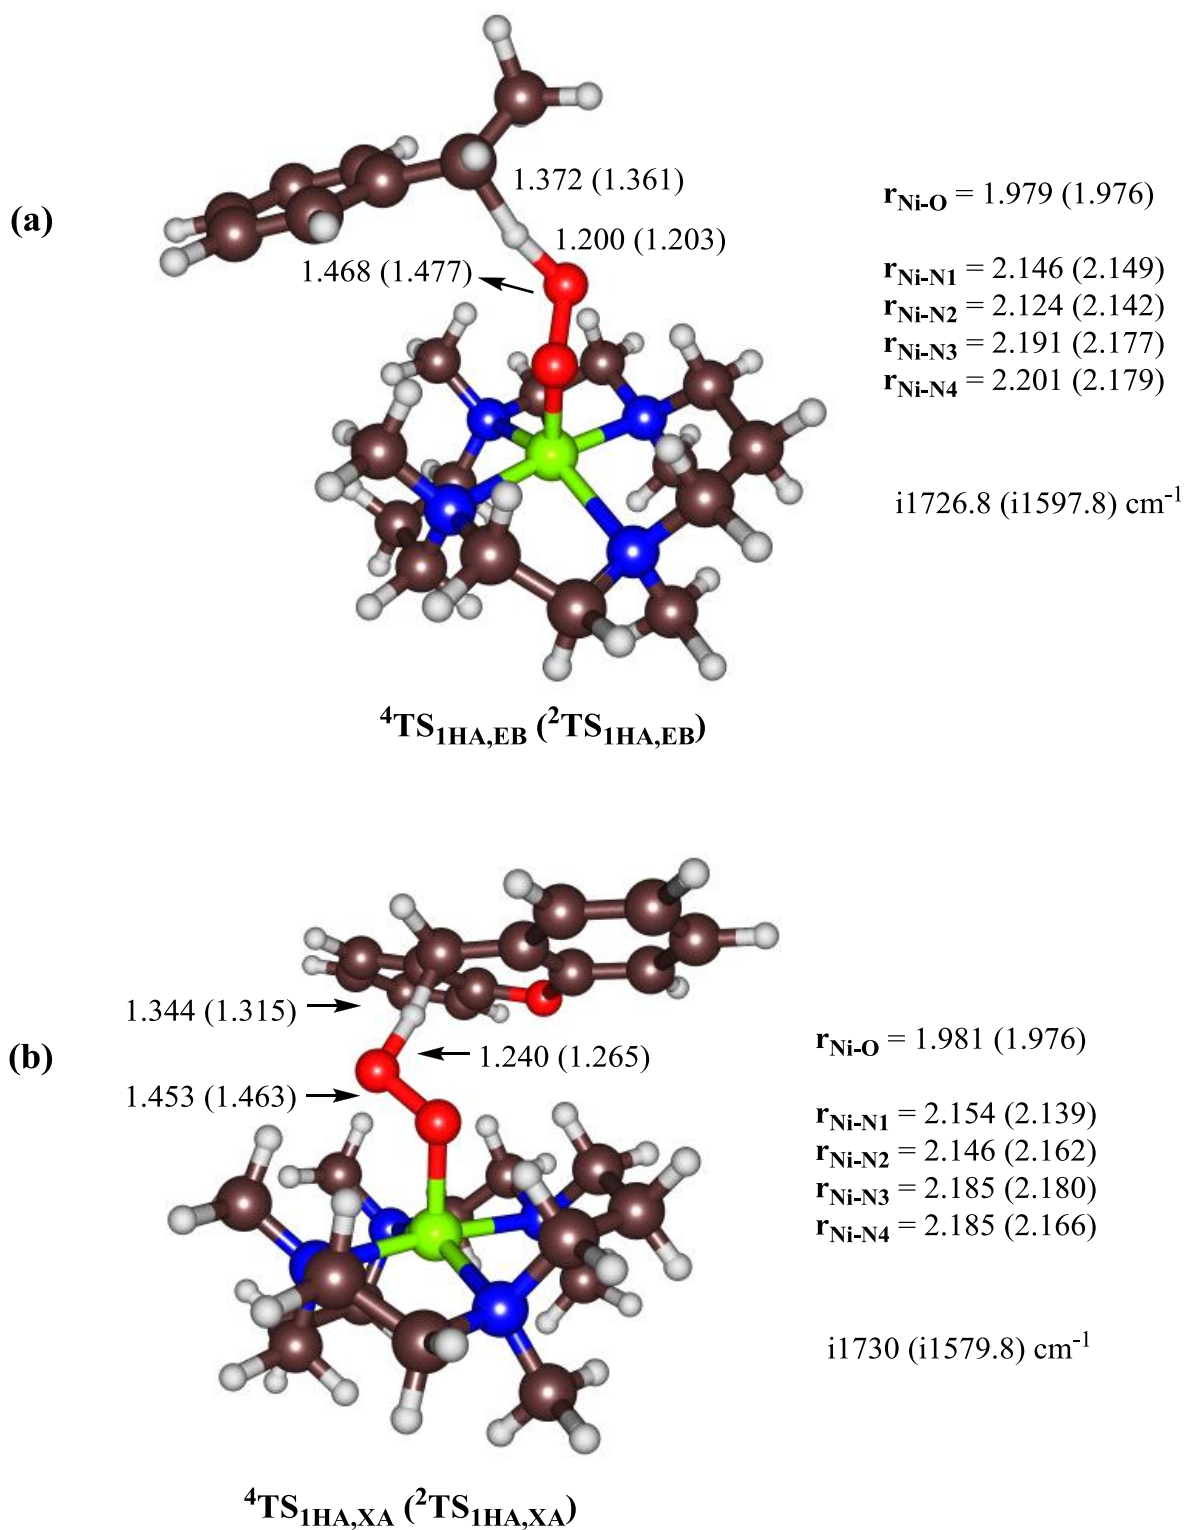

**Figure S4.** Optimized geometries of (a)- ${}^{4,2}\text{TS}_{1\text{HA,EB}}$  and (b)- ${}^{4,2}\text{TS}_{1\text{HA,XA}}$  as obtained at UB3LYP/BS1 in Jaguar. Bond lengths and imaginary frequencies are in angstroms and wave numbers respectively.

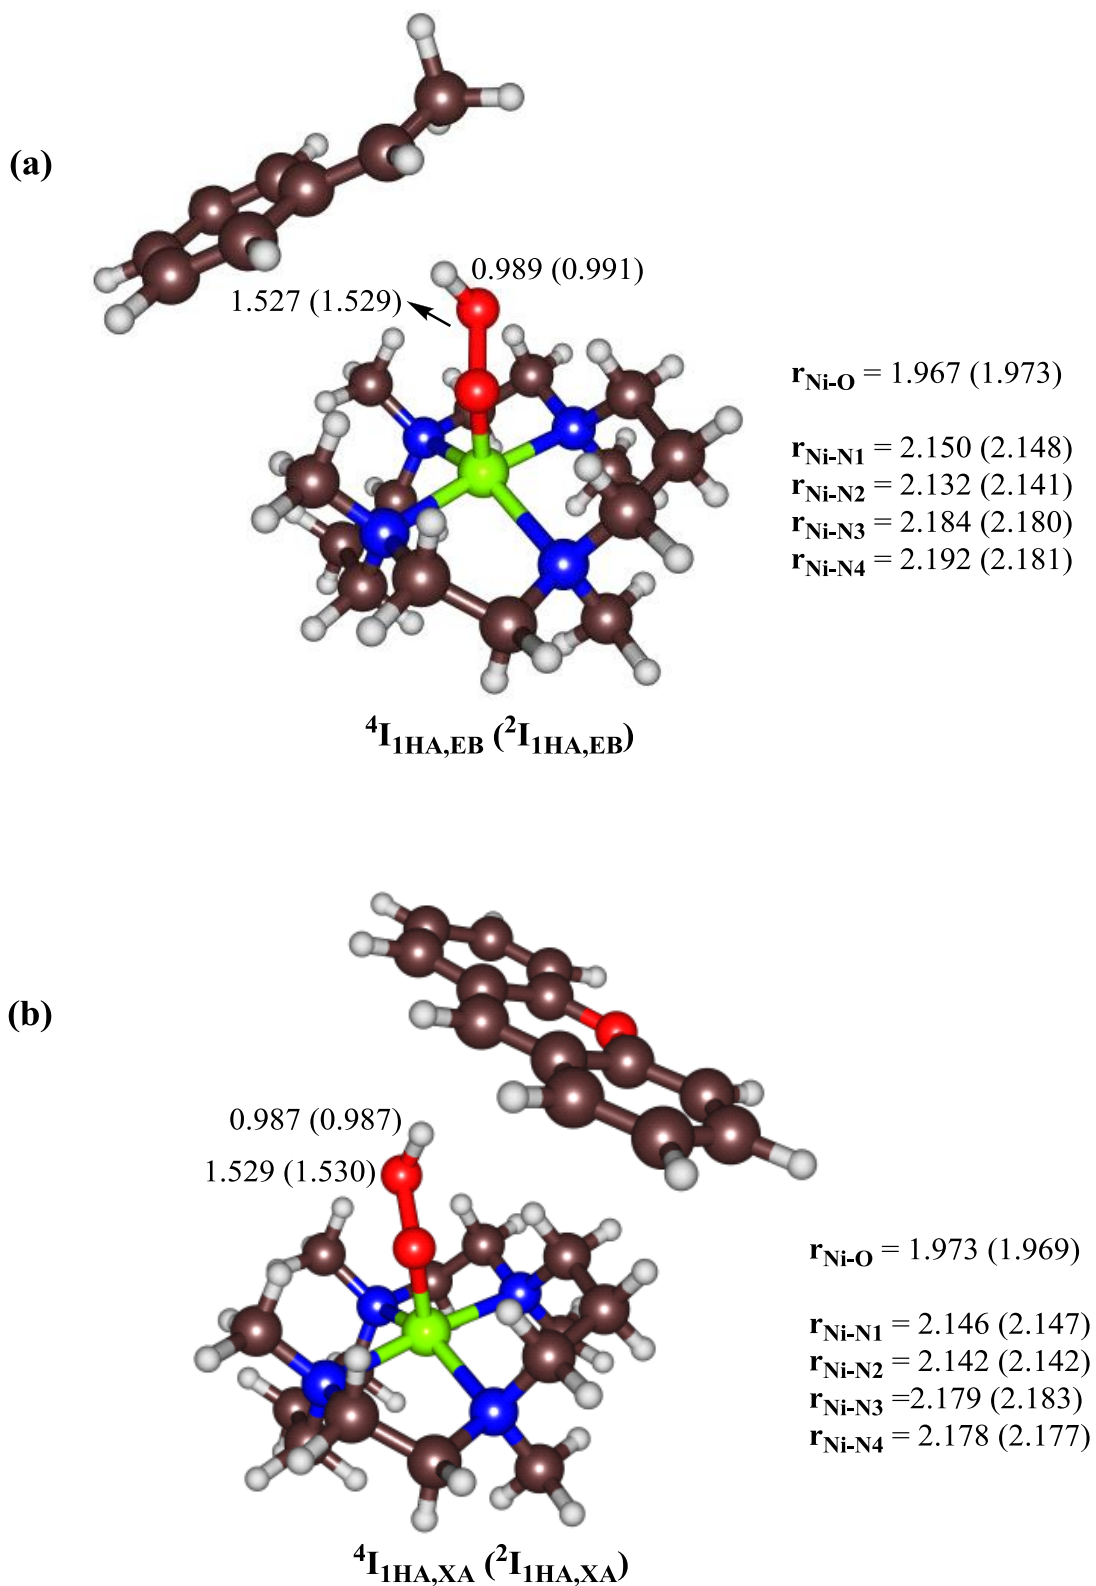

**Figure S5.** Optimized geometries of (a)- ${}^{4,2}\mathbf{I}_{1\text{HA,EB}}$  and (b)- ${}^{4,2}\mathbf{I}_{1\text{HA,XA}}$  as obtained at UB3LYP/BS1 in Jaguar with bond lengths given in angstroms.

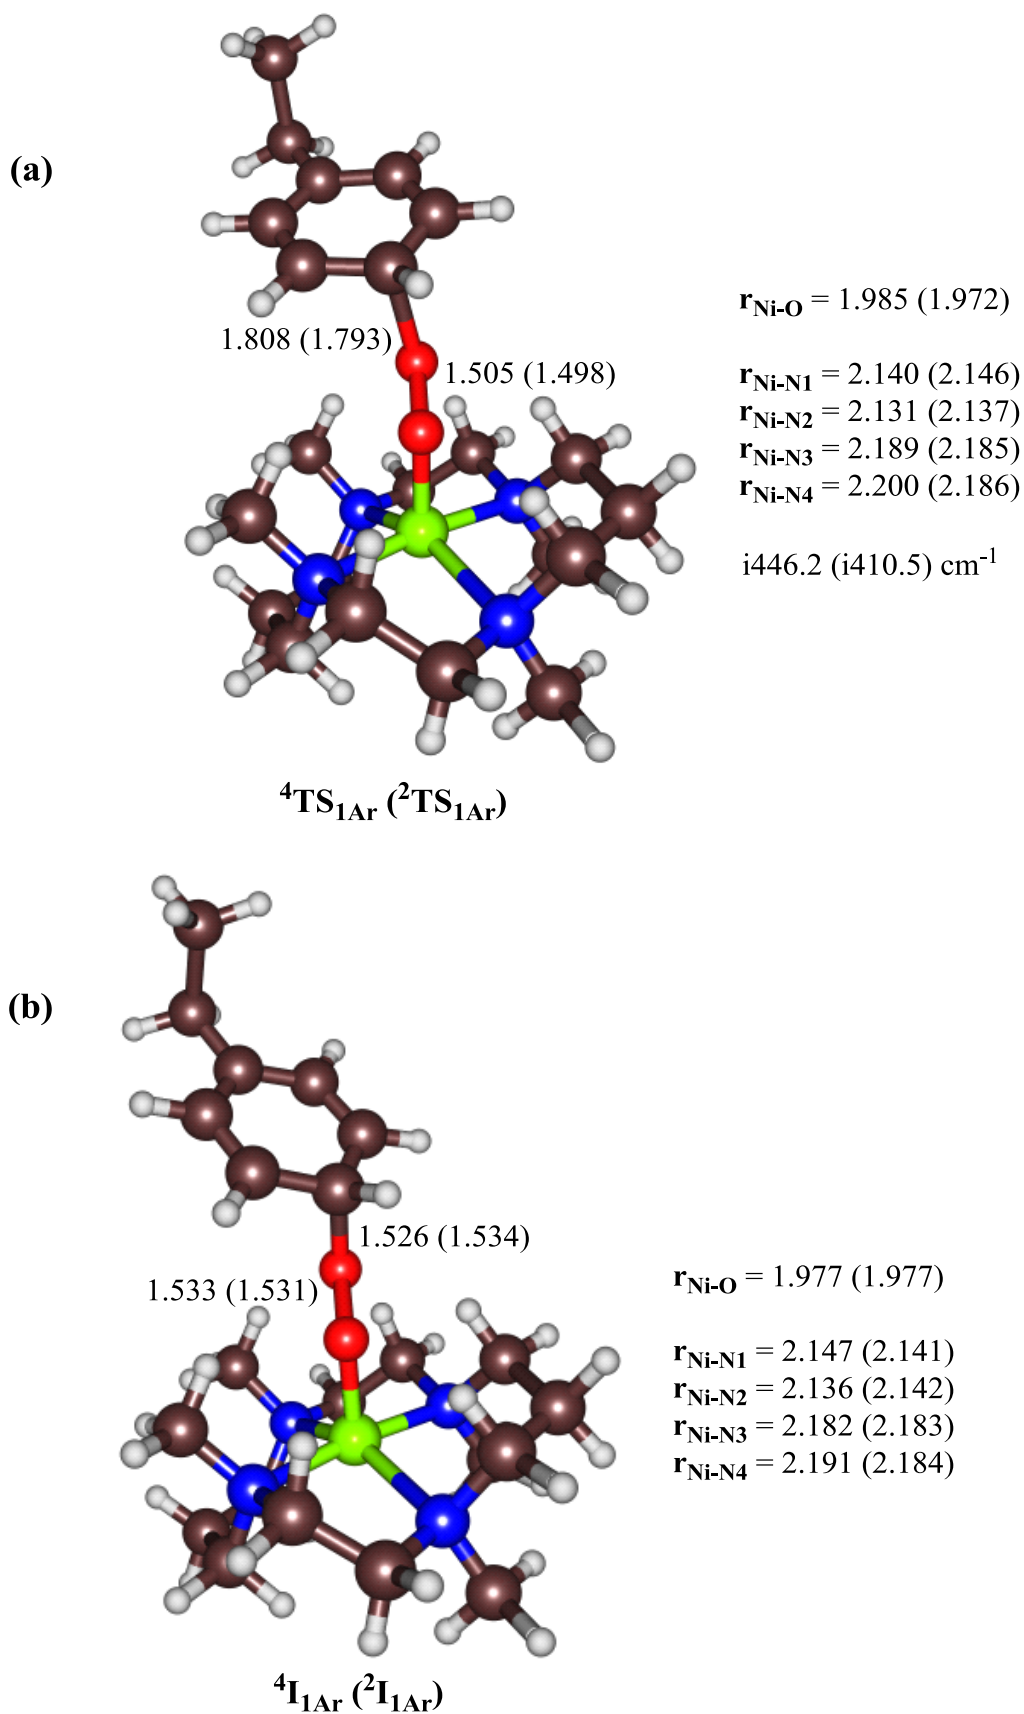

**Figure S6.** Optimized geometries of (a)-  ${}^{4,2}\text{TS}_{1\text{Ar}}$  and (b)-  ${}^{4,2}\text{I}_{1\text{Ar}}$  as obtained at UB3LYP/BS1 in Jaguar. Bond lengths and imaginary frequencies are in angstroms and wave numbers respectively.



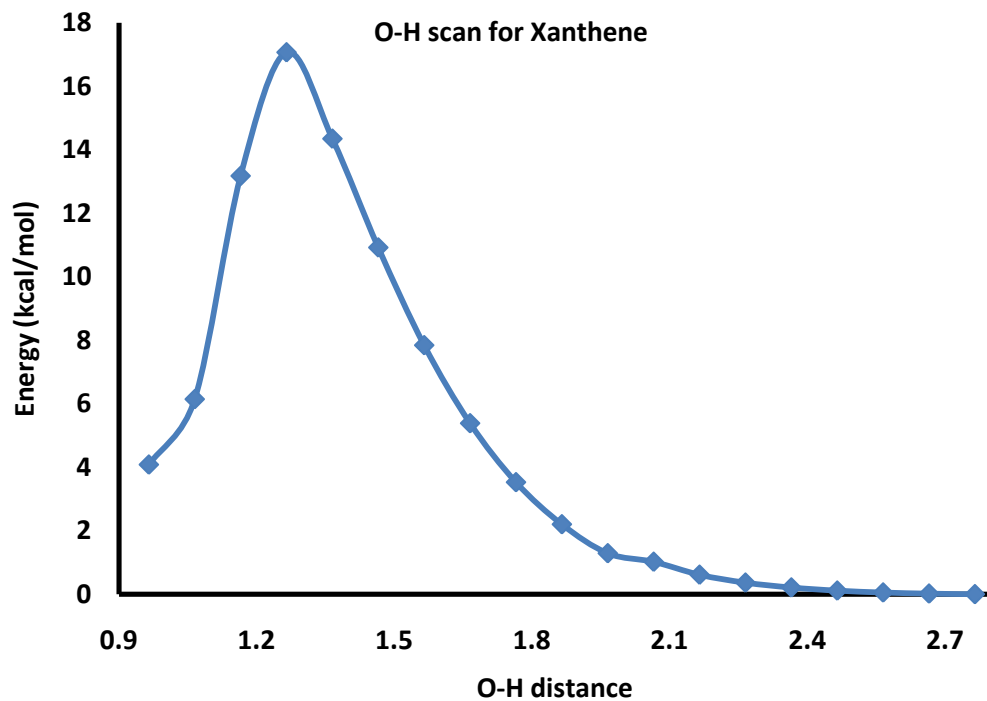

**Figure S7.** Hydrogen atom transfer scan starting from  ${}^4\mathbf{R}_{1XA}$  in the direction of an Ni(II)-hydroperoxo complex. Energies are given in kcal mol $^{-1}$ .

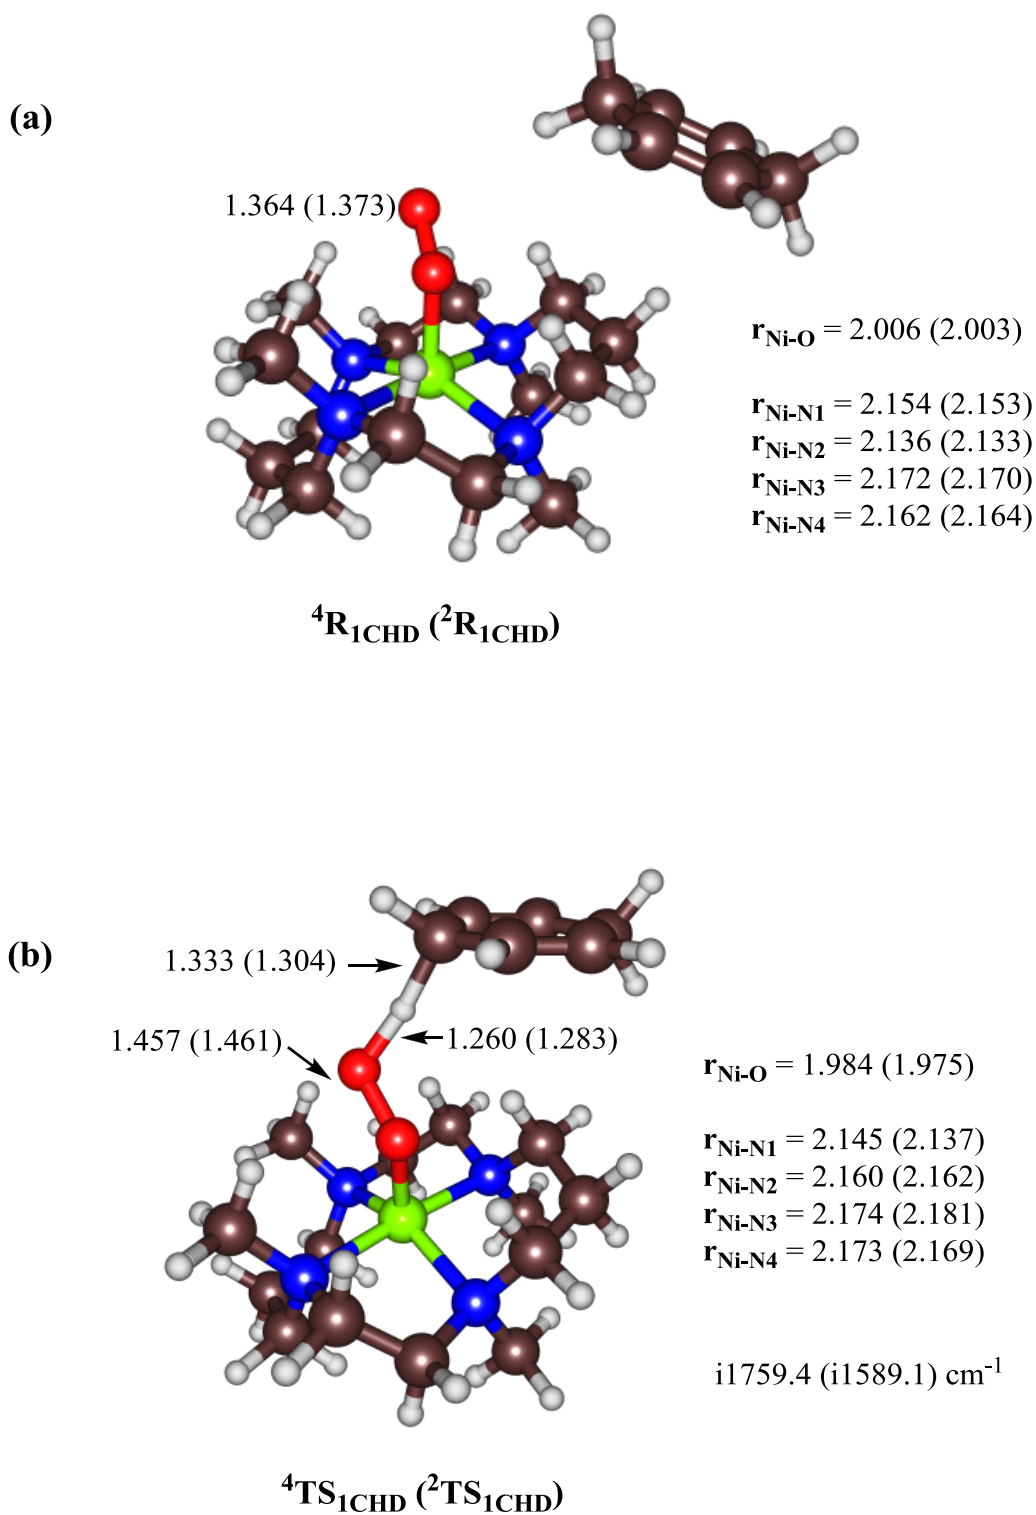

**Figure S8.** Optimized geometries of (a)-  ${}^{4,2}\mathbf{R}_{1\text{CHD}}$  and (b)-  ${}^{4,2}\mathbf{TS}_{1\text{HA,CHD}}$  as obtained at UB3LYP/BS1 in Jaguar. Bond lengths and imaginary frequencies are in angstroms and wave numbers respectively.

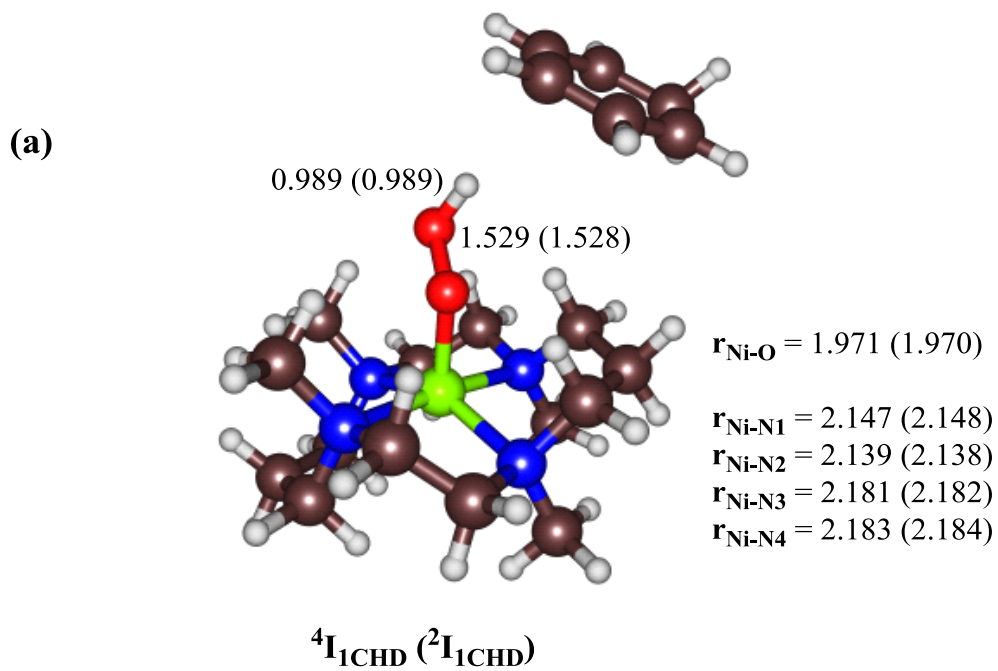

**Figure S9.** Optimized geometries of  ${}^{4,2}\text{I}_{\text{IHA,CHD}}$  as obtained at UB3LYP/BS1 in Jaguar. Bond lengths are in angstroms.

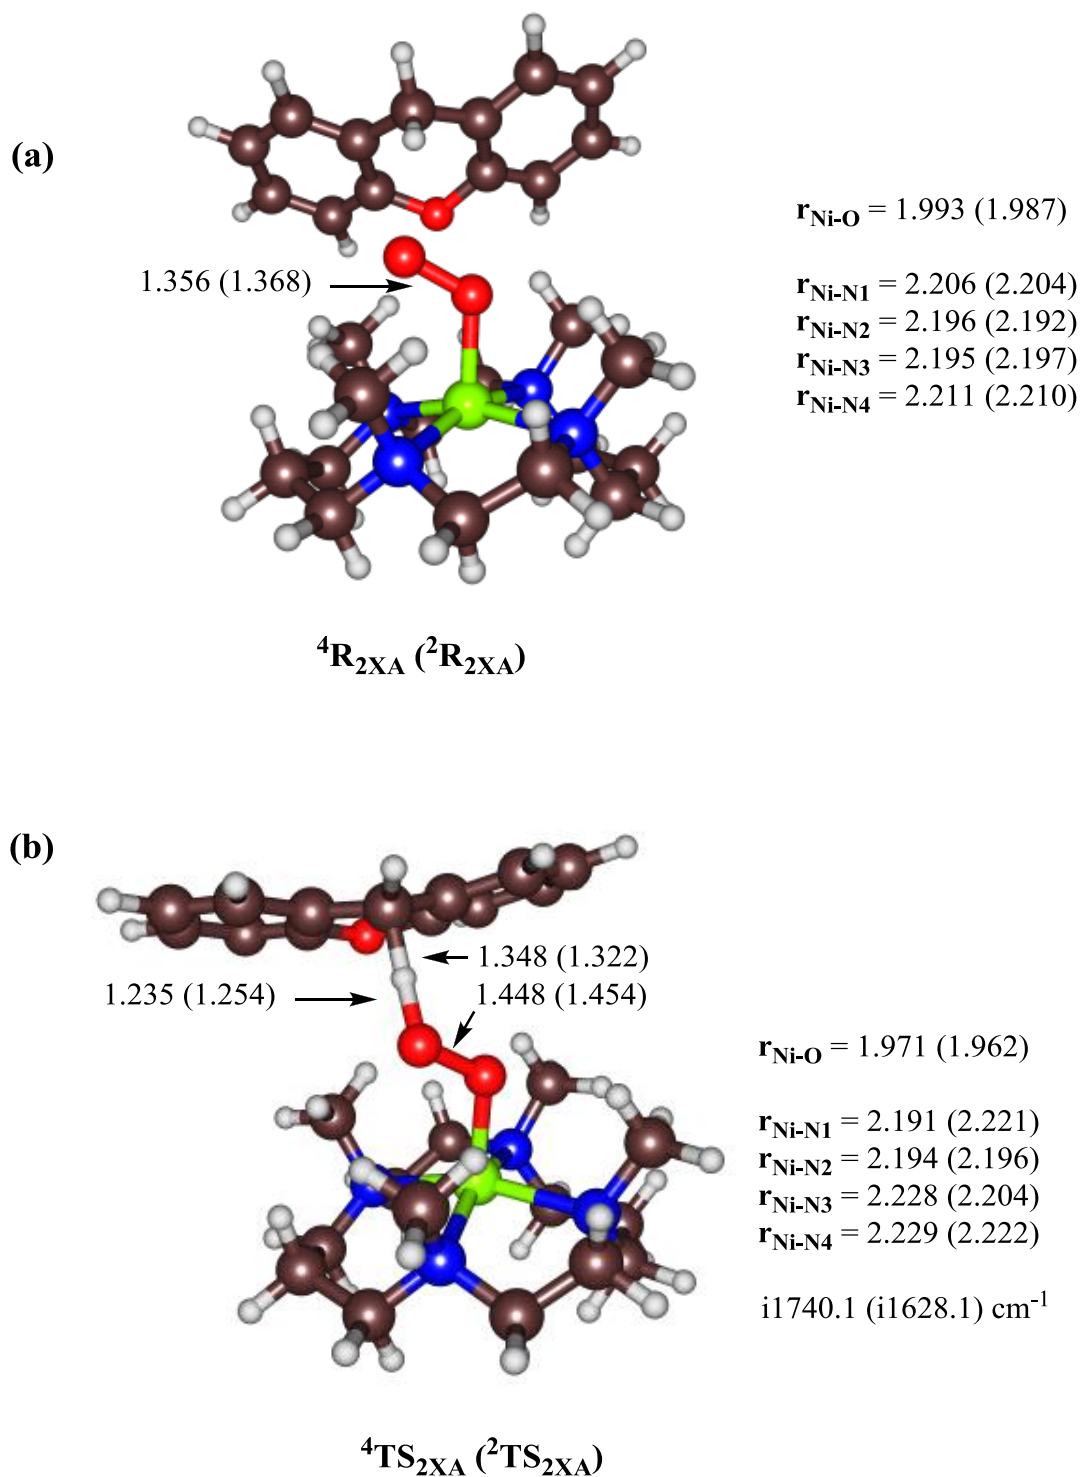

**Figure S10.** Optimized geometries of (a)- ${}^{4,2}\text{R}_{2\text{HA},\text{XA}}$  and (b)- ${}^{4,2}\text{TS}_{2\text{HA},\text{XA}}$  as obtained at UB3LYP/BS1 in Jaguar. Bond lengths and imaginary frequencies are in angstroms and wave numbers respectively.

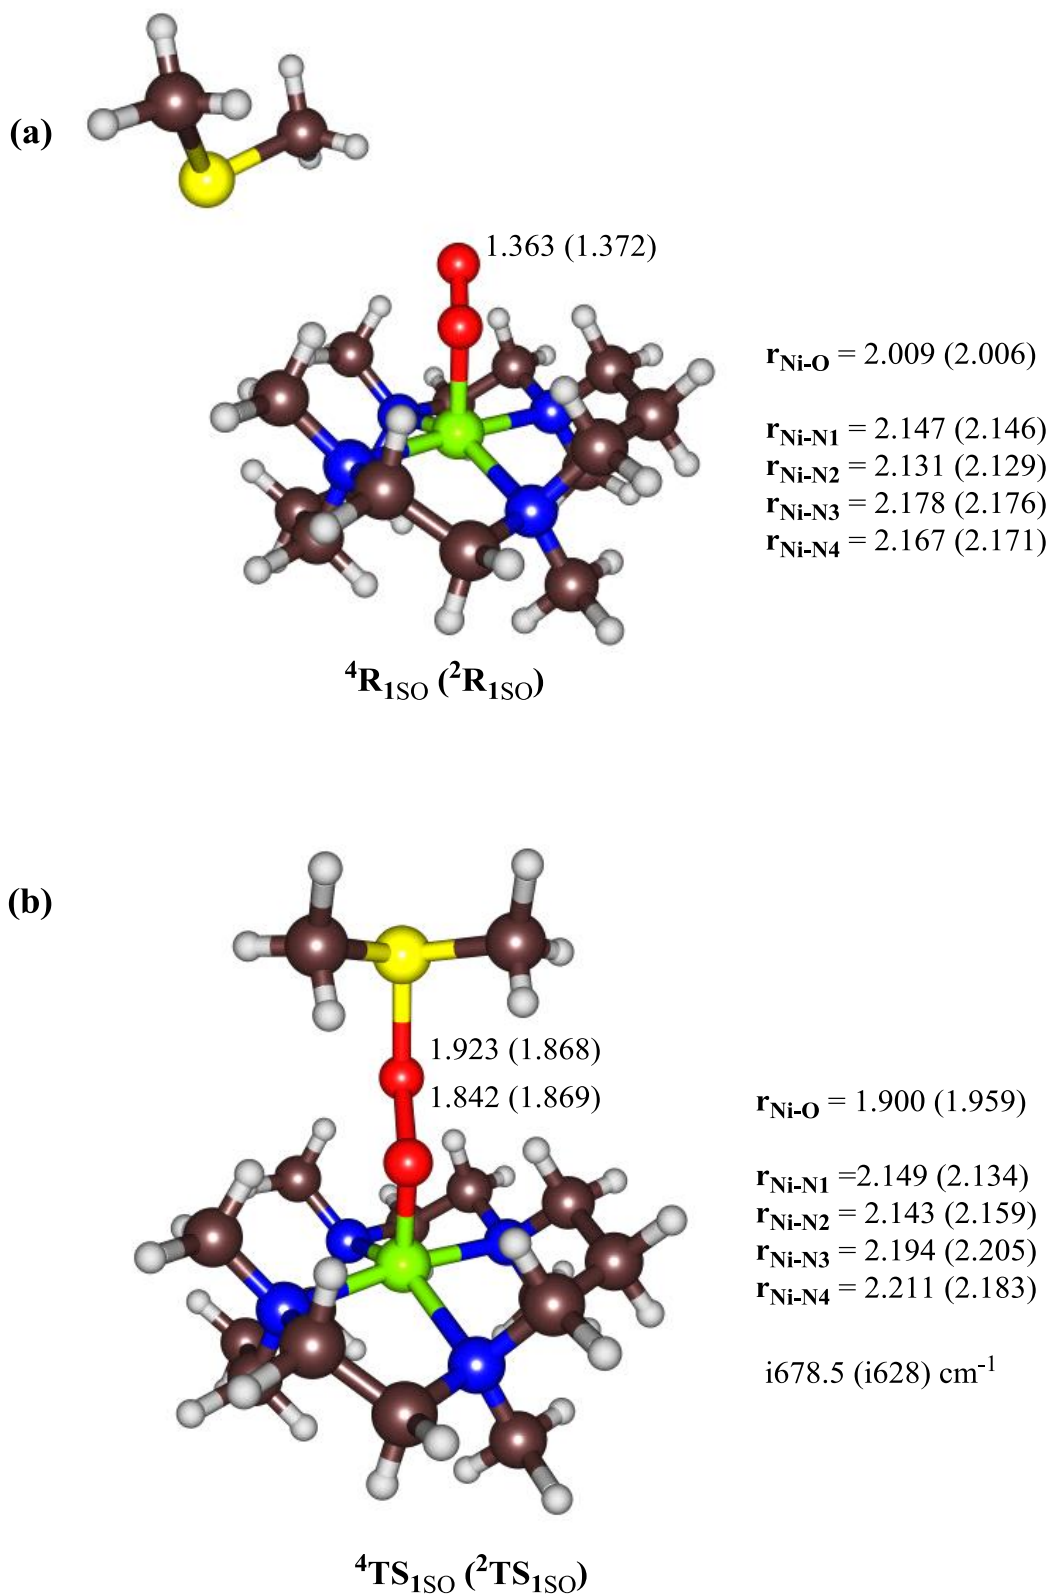

**Figure S11.** Optimized geometries of (a)-  ${}^{4,2}\text{R}_{1\text{SO}}$  and (b)-  ${}^{4,2}\text{TS}_{1\text{SO}}$  as obtained at UB3LYP/BS1 in Jaguar. Bond lengths and imaginary frequencies are in angstroms and wave numbers respectively.

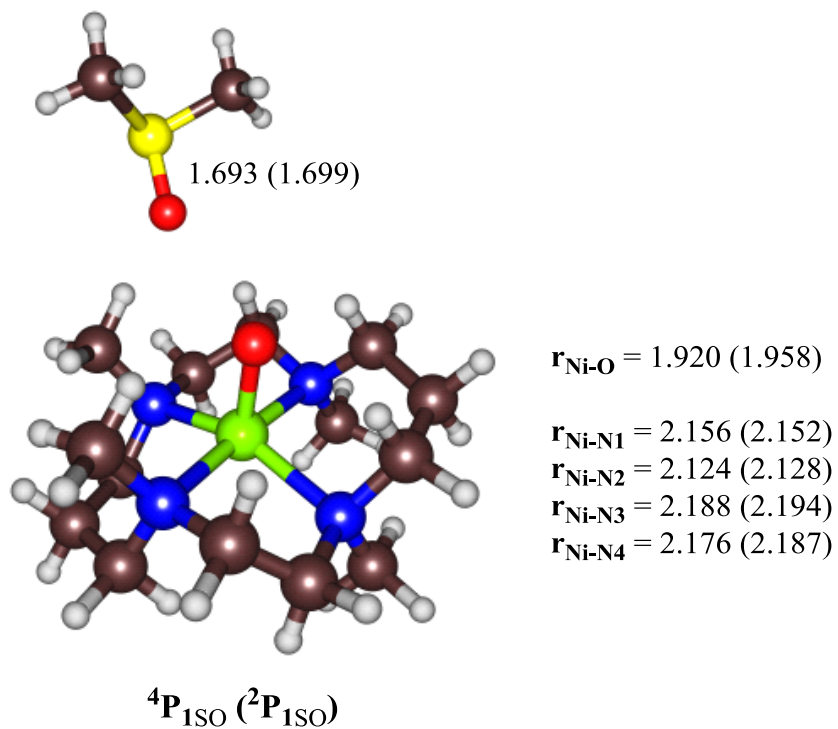

**Figure S12.** Optimized geometries of  ${}^{4,2}\text{P}_{1\text{SO}}$  as obtained at UB3LYP/BS1 in Jaguar. Bond lengths are in angstroms.

**Table S6.** Relative energies for the sulfoxidation reaction of dimethylsulfide (DMS) by  $^{2,4}[\text{Ni}^{\text{II}}\text{OO}(\text{TMC})]^+$  as calculated with UB3LYP/BS1. Single point calculations done in solvent and with basis set BS2. ZPE calculated at UB3LYP/BS1.

|                               | Basis set BS1 |                        |                       |                                   |            | Basis set BS2 |                        |                       |                                   |
|-------------------------------|---------------|------------------------|-----------------------|-----------------------------------|------------|---------------|------------------------|-----------------------|-----------------------------------|
|                               | $\Delta E$    | $\Delta E+\text{solv}$ | $\Delta E+\text{ZPE}$ | $\Delta E+\text{ZPE}+\text{Solv}$ | $\Delta G$ | $\Delta E$    | $\Delta E+\text{solv}$ | $\Delta E+\text{ZPE}$ | $\Delta E+\text{ZPE}+\text{Solv}$ |
| $^2\mathbf{R}_1 + \text{DMS}$ | 0.00          | 0.00                   | 0.00                  | 0.00                              | 0.00       | 0.00          | 0.00                   | 0.00                  | 0.00                              |
| $^4\mathbf{R}_1 + \text{DMS}$ | -2.54         | -1.82                  | -2.58                 | -1.86                             | -3.00      | -2.79         | -2.07                  | -2.83                 | -2.11                             |
| $^2\mathbf{R}_1\mathbf{C}$    | -3.43         | 1.52                   | -3.14                 | 1.81                              | 6.88       | -2.40         | 2.55                   | -2.11                 | 2.84                              |
| $^4\mathbf{R}_1\mathbf{C}$    | -5.83         | -0.41                  | -5.70                 | -0.29                             | 6.21       | -5.11         | 0.30                   | -4.99                 | 0.43                              |
| $^2\mathbf{TS}_{\text{ISO}}$  | 32.97         | 46.73                  | 32.67                 | 46.43                             | 43.88      | 31.41         | 45.17                  | 31.11                 | 44.86                             |
| $^4\mathbf{TS}_{\text{ISO}}$  | 32.82         | 46.63                  | 32.58                 | 46.38                             | 43.43      | 33.66         | 47.46                  | 33.41                 | 47.22                             |
| $^2\mathbf{P}_{\text{ISO}}$   | 22.10         | 31.52                  | 22.05                 | 31.46                             | 33.53      | 6.49          | 15.90                  | 6.44                  | 15.85                             |
| $^4\mathbf{P}_{\text{ISO}}$   | 18.73         | 27.69                  | 18.52                 | 27.48                             | 25.05      | 0.75          | 9.71                   | 0.55                  | 9.50                              |

**Table S7.** Group spin densities and charges of UB3LYP/BS1 optimized geometries for the reaction of dimethylsulfide (DMS) with  $^{2,4}[\text{Ni}^{\text{II}}\text{OO}(\text{TMC})]^+$ .

(a) BS1 Group Spin Densities and Group Charges

|                              | Spin Densities |       |       |      |       | Group Charges |       |       |      |      |
|------------------------------|----------------|-------|-------|------|-------|---------------|-------|-------|------|------|
|                              | Ni             | O1    | O2    | TMC  | DMS   | Ni            | O1    | O2    | TMC  | DMS  |
| $^2\mathbf{R}_1$             | 1.53           | -0.21 | -0.57 | 0.25 | -     | 0.55          | -0.31 | -0.19 | 0.94 | -    |
| $^4\mathbf{R}_1$             | 1.48           | 0.59  | 0.69  | 0.25 | -     | 0.54          | -0.29 | -0.18 | 0.93 | -    |
| $^2\mathbf{R}_1\mathbf{C}$   | 1.54           | -0.23 | -0.57 | 0.26 | 0.00  | 0.55          | -0.31 | -0.20 | 0.95 | 0.01 |
| $^4\mathbf{R}_1\mathbf{C}$   | 1.49           | 0.59  | 0.67  | 0.25 | 0.00  | 0.53          | -0.28 | -0.19 | 0.94 | 0.01 |
| $^2\mathbf{TS}_{\text{ISO}}$ | 1.54           | -0.39 | -0.16 | 0.21 | -0.20 | 0.49          | -0.49 | -0.46 | 0.81 | 0.65 |
| $^4\mathbf{TS}_{\text{ISO}}$ | 1.58           | 0.75  | 0.16  | 0.25 | 0.26  | 0.50          | -0.48 | -0.43 | 0.81 | 0.61 |
| $^2\mathbf{P}_{\text{ISO}}$  | 1.58           | -0.82 | -0.01 | 0.24 | 0.01  | 0.50          | -0.46 | -0.68 | 0.88 | 0.76 |
| $^4\mathbf{P}_{\text{ISO}}$  | 1.53           | 1.19  | 0.00  | 0.28 | 0.00  | 0.48          | -0.44 | -0.69 | 0.89 | 0.77 |

(b) BS1-Solv. Group Spin Densities and Group Charges

|                              | Spin Densities |       |       |      |       | Group Charges |       |       |      |      |
|------------------------------|----------------|-------|-------|------|-------|---------------|-------|-------|------|------|
|                              | Ni             | O1    | O2    | TMC  | DMS   | Ni            | O1    | O2    | TMC  | DMS  |
| $^2\mathbf{R}_1$             | 1.57           | -0.30 | -0.56 | 0.28 | -     | 0.55          | -0.32 | -0.27 | 1.03 | -    |
| $^4\mathbf{R}_1$             | 1.53           | 0.57  | 0.61  | 0.28 | -     | 0.54          | -0.30 | -0.27 | 1.02 | -    |
| $^2\mathbf{R}_1\mathbf{C}$   | 1.57           | -0.29 | -0.56 | 0.28 | 0.00  | 0.55          | -0.32 | -0.25 | 1.03 | 0.00 |
| $^4\mathbf{R}_1\mathbf{C}$   | 1.53           | 0.57  | 0.62  | 0.28 | 0.00  | 0.53          | -0.30 | -0.25 | 1.02 | 0.00 |
| $^2\mathbf{TS}_{\text{ISO}}$ | 1.55           | -0.41 | -0.15 | 0.22 | -0.21 | 0.48          | -0.49 | -0.47 | 0.84 | 0.64 |
| $^4\mathbf{TS}_{\text{ISO}}$ | 1.59           | 0.74  | 0.16  | 0.25 | 0.26  | 0.49          | -0.48 | -0.43 | 0.84 | 0.59 |
| $^2\mathbf{P}_{\text{ISO}}$  | 1.59           | -0.83 | -0.01 | 0.24 | 0.01  | 0.49          | -0.48 | -0.72 | 0.92 | 0.78 |
| $^4\mathbf{P}_{\text{ISO}}$  | 1.56           | 1.14  | 0.00  | 0.30 | 0.00  | 0.48          | -0.50 | -0.71 | 0.94 | 0.78 |

(c) BS2 Group Spin Densities and Group Charges

|                              | Spin Densities |       |       |      |       | Group Charges |       |       |      |       |
|------------------------------|----------------|-------|-------|------|-------|---------------|-------|-------|------|-------|
|                              | Ni             | O1    | O2    | TMC  | DMS   | Ni            | O1    | O2    | TMC  | DMS   |
| $^2\mathbf{R}_1$             | 1.58           | -0.21 | -0.58 | 0.21 | -     | 0.48          | -0.18 | -0.16 | 0.86 | -     |
| $^4\mathbf{R}_1$             | 1.53           | 0.57  | 0.68  | 0.22 | -     | 0.48          | -0.16 | -0.15 | 0.83 | -     |
| $^2\mathbf{R}_1\mathbf{C}$   | 1.59           | -0.22 | -0.58 | 0.21 | 0.00  | 0.41          | -0.17 | -0.16 | 0.93 | -0.02 |
| $^4\mathbf{R}_1\mathbf{C}$   | 1.53           | 0.57  | 0.67  | 0.22 | 0.00  | 0.41          | -0.15 | -0.15 | 0.91 | -0.02 |
| $^2\mathbf{TS}_{\text{ISO}}$ | 1.59           | -0.41 | -0.13 | 0.17 | -0.22 | 0.44          | -0.44 | -0.29 | 0.82 | 0.48  |
| $^4\mathbf{TS}_{\text{ISO}}$ | 1.65           | 0.73  | 0.12  | 0.21 | 0.29  | 0.31          | -0.37 | -0.27 | 0.87 | 0.45  |
| $^2\mathbf{P}_{\text{ISO}}$  | 1.64           | -0.84 | -0.01 | 0.20 | 0.00  | 0.40          | -0.31 | -0.63 | 0.91 | 0.62  |
| $^4\mathbf{P}_{\text{ISO}}$  | 1.59           | 1.16  | 0.00  | 0.24 | 0.00  | 0.40          | -0.30 | -0.50 | 0.84 | 0.56  |



**Table S8.** Absolute energies of UB3LYP/BS1 optimized geometries for the reaction of dimethylsulfide (DMS) with  $^{2,4}[\text{Ni}^{\text{II}}\text{OO}(\text{TMC})]^+$  and single point solvent and UB3LYP/BS2 results.

|                            | BS1 (Hartree) |              |              |                    | BS2 (Hartree) |              |
|----------------------------|---------------|--------------|--------------|--------------------|---------------|--------------|
|                            | E             | E+ZPE        | G            | Solv<br>(kcal/mol) | E             | E+ZPE        |
| DMS                        | -477.968339   | -477.891743  | -477.919078  | -4.008             | -478.055895   | -477.979299  |
| $^2\text{R}_1$             | -1091.002381  | -1090.520163 | -1090.56902  | -48.5147           | -1091.472664  | -1090.990446 |
| $^4\text{R}_1$             | -1091.006427  | -1090.524275 | -1090.573798 | -47.7938           | -1091.477106  | -1090.994954 |
| $^2\text{R}_1\text{C}$     | -1568.976193  | -1568.416912 | -1568.477141 | -47.5688           | -1569.532392  | -1568.973111 |
| $^4\text{R}_1\text{C}$     | -1568.980009  | -1568.420994 | -1568.478202 | -47.1068           | -1569.536707  | -1568.977692 |
| $^2\text{TS}_{1\text{SO}}$ | -1568.918172  | -1568.359841 | -1568.418164 | -38.7669           | -1569.478504  | -1568.920173 |
| $^4\text{TS}_{1\text{SO}}$ | -1568.918417  | -1568.359993 | -1568.418881 | -38.7151           | -1569.474926  | -1568.916502 |
| $^2\text{P}_{1\text{SO}}$  | -1568.935501  | -1568.376770 | -1568.434658 | -43.1070           | -1569.518221  | -1568.959490 |
| $^4\text{P}_{1\text{SO}}$  | -1568.940866  | -1568.382386 | -1568.448173 | -43.5645           | -1569.527357  | -1568.968876 |

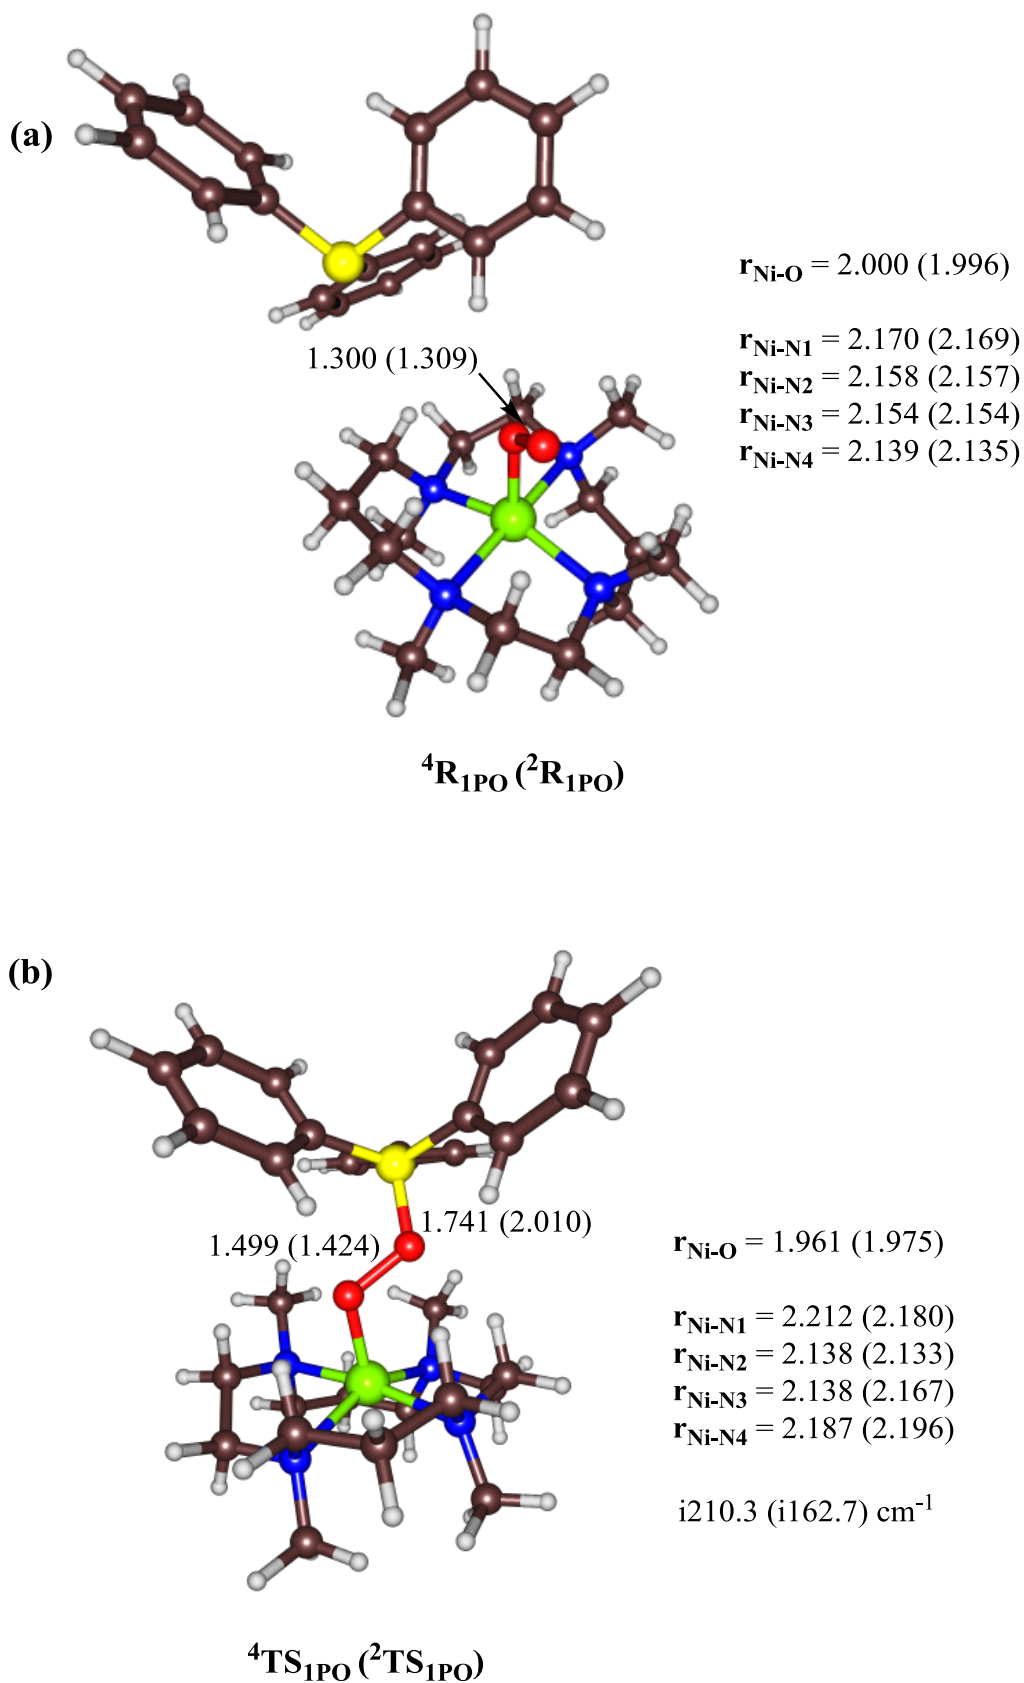

**Figure S13.** Optimized geometries of  ${}^4\text{R}_{1\text{PO}}$  and  ${}^4\text{TS}_{1\text{PO}}$  as obtained at UB3LYP/BS2 in Jaguar. Bond lengths and imaginary frequencies are in angstroms and wave numbers respectively.

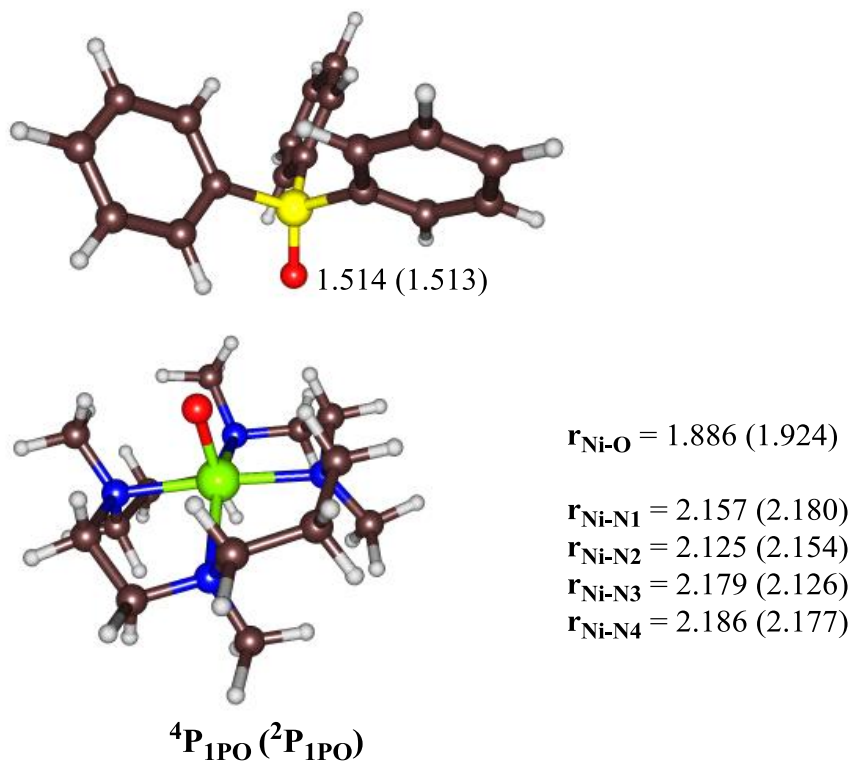

**Figure S14.** Optimized geometries of  ${}^4,2\text{P}_{\text{IPO}}$  as obtained at UB3LYP/BS2 in Jaguar. Bond lengths are in angstroms.

**Table S9.** Absolute energies of UB3LYP/BS2 optimized geometries for the oxidation reaction of triphenylphosphine ( $\text{PPh}_3$ ) with  ${}^{2,4}[\text{Ni}^{\text{II}}\text{OO}(\text{TMC})]^+$  and single point solvent results.

|                              | E            | E+ZPE   | G            | E.Solvent (kcal/mol) |
|------------------------------|--------------|---------|--------------|----------------------|
| ${}^4\text{R}_{\text{IPO}}$  | -2127.961604 | 472.350 | -2127.287557 | -2128.036857         |
| ${}^2\text{R}_{\text{IPO}}$  | -2127.957088 | 472.445 | -2127.282262 | -2128.033382         |
| ${}^4\text{TS}_{\text{IPO}}$ | -2127.925914 | 471.583 | -2127.246954 | -2127.997616         |
| ${}^2\text{TS}_{\text{IPO}}$ | -2127.931036 | 471.697 | -2127.253553 | -2127.996325         |
| ${}^4\text{P}_{\text{IPO}}$  | -2128.036056 | 473.271 | -2127.358468 | -2128.103427         |
| ${}^2\text{P}_{\text{IPO}}$  | -2128.032025 | 473.236 | -2127.353697 | -2128.100953         |

**Table S10.** Relative energies for the oxidation reaction of triphenylphosphine ( $\text{PPh}_3$ ) with  ${}^{2,4}[\text{Ni}^{\text{II}}\text{OO}(\text{TMC})]^+$  as calculated with UB3LYP/BS2. Single point solvent calculations done in solvent with basis set BS2.

|                              | $\Delta\text{E}$ | $\Delta\text{E}+\text{ZPE}$ | $\Delta\text{G}$ | $\Delta\text{G}+\text{ZPE}$ | $\Delta\text{E}(\text{solv})$ | $\Delta\text{E}(\text{solv})+\text{ZPE}$ | $\Delta\text{G} + \Delta\text{E}(\text{solv})$ |
|------------------------------|------------------|-----------------------------|------------------|-----------------------------|-------------------------------|------------------------------------------|------------------------------------------------|
| ${}^4\text{R}_{\text{IPO}}$  | 0.00             | 0.00                        | 0.00             | 0.00                        | 0.00                          | 0.00                                     | 0.00                                           |
| ${}^2\text{R}_{\text{IPO}}$  | 2.83             | 2.93                        | 3.32             | 3.42                        | 2.18                          | 2.93                                     | 2.67                                           |
| ${}^4\text{TS}_{\text{IPO}}$ | 22.40            | 21.63                       | 25.48            | 24.71                       | 24.62                         | 21.63                                    | 27.71                                          |
| ${}^2\text{TS}_{\text{IPO}}$ | 19.18            | 18.53                       | 21.34            | 20.68                       | 25.43                         | 18.53                                    | 27.59                                          |
| ${}^4\text{P}_{\text{IPO}}$  | -46.72           | -45.80                      | -44.50           | -43.58                      | -41.77                        | -45.80                                   | -39.55                                         |
| ${}^2\text{P}_{\text{IPO}}$  | -44.19           | -43.30                      | -41.50           | -40.62                      | -40.22                        | -43.30                                   | -37.53                                         |

**Table S11.** Group spin densities and charges of UB3LYP/BS2 optimized geometries for the reaction of triphenylphosphine (PPh<sub>3</sub>) with <sup>2,4</sup>[Ni<sup>II</sup>OO(TMC)]<sup>+</sup>.

(a) B2 Group Spin Densities and Group Charges

|                                | Spin Densities |       |       |      |                  | Group Charges |       |       |      |                  |
|--------------------------------|----------------|-------|-------|------|------------------|---------------|-------|-------|------|------------------|
|                                | Ni             | O1    | O2    | TMC  | PPh <sub>3</sub> | Ni            | O1    | O2    | TMC  | PPh <sub>3</sub> |
| <sup>4</sup> R <sub>IPO</sub>  | 1.50           | 0.60  | 0.69  | 0.21 | 0.00             | 0.34          | -0.04 | -0.16 | 0.89 | -0.03            |
| <sup>2</sup> R <sub>IPO</sub>  | 1.57           | -0.22 | -0.54 | 0.20 | 0.00             | 0.35          | -0.07 | -0.17 | 0.92 | -0.04            |
| <sup>4</sup> TS <sub>IPO</sub> | 1.63           | 0.20  | 0.09  | 0.21 | 0.87             | 0.37          | -0.19 | -0.30 | 0.80 | 0.31             |
| <sup>2</sup> TS <sub>IPO</sub> | 1.49           | 0.17  | -0.21 | 0.16 | -0.62            | 0.46          | -0.24 | -0.24 | 0.68 | 0.34             |
| <sup>4</sup> P <sub>IPO</sub>  | 1.60           | 1.14  | 0.00  | 0.26 | 0.01             | 0.38          | -0.28 | -0.67 | 0.84 | 0.73             |
| <sup>2</sup> P <sub>IPO</sub>  | 1.64           | -0.83 | 0.00  | 0.18 | 0.00             | 0.35          | -0.26 | -0.67 | 0.85 | 0.73             |

(b) B2-Solvent. Group Spin Densities and Group Charges

|                                | Spin Densities |       |       |      |                  | Group Charges |       |       |      |                  |
|--------------------------------|----------------|-------|-------|------|------------------|---------------|-------|-------|------|------------------|
|                                | Ni             | O1    | O2    | TMC  | PPh <sub>3</sub> | Ni            | O1    | O2    | TMC  | PPh <sub>3</sub> |
| <sup>4</sup> R <sub>IPO</sub>  | 1.55           | 0.59  | 0.63  | 0.23 | 0.00             | 0.37          | -0.04 | -0.26 | 0.98 | -0.05            |
| <sup>2</sup> R <sub>IPO</sub>  | 1.60           | -0.29 | -0.54 | 0.22 | 0.00             | 0.38          | -0.06 | -0.27 | 1.01 | -0.06            |
| <sup>4</sup> TS <sub>IPO</sub> | 1.64           | 0.16  | 0.08  | 0.22 | 0.90             | 0.38          | -0.19 | -0.29 | 0.87 | 0.22             |
| <sup>2</sup> TS <sub>IPO</sub> | 1.57           | 0.14  | -0.26 | 0.19 | -0.64            | 0.47          | -0.23 | -0.23 | 0.78 | 0.20             |
| <sup>4</sup> P <sub>IPO</sub>  | 1.61           | 1.12  | 0.00  | 0.27 | 0.01             | 0.41          | -0.32 | -0.65 | 0.87 | 0.70             |
| <sup>2</sup> P <sub>IPO</sub>  | 1.65           | -0.84 | 0.00  | 0.19 | 0.00             | 0.39          | -0.30 | -0.68 | 0.88 | 0.71             |

**Table S12.** Energies and relative energies of optimized geometries of <sup>2,4</sup>[Ni<sup>II</sup>OO(TMC)]<sup>+</sup> using alternative density functional methods.

|                      | E (au)       | ΔE (kcal/mol) |
|----------------------|--------------|---------------|
| BP86/LACVP:          |              |               |
| M2                   | -1091.113888 | 0.00          |
| M4                   | -1091.120218 | -3.97         |
| BHandHLYP/LACV3P++** |              |               |
| M2                   | -1081.113259 | 0.00          |
| M4                   | -1081.115627 | -1.49         |
| BLYP/LACVP:          |              |               |
| M2                   | -1090.533733 | 0.00          |
| M4                   | -1090.540212 | -4.07         |
| BP86-VWN5/LACVP:     |              |               |
| M2                   | -1091.178779 | 0.00          |
| M4                   | -1091.185479 | -4.20         |

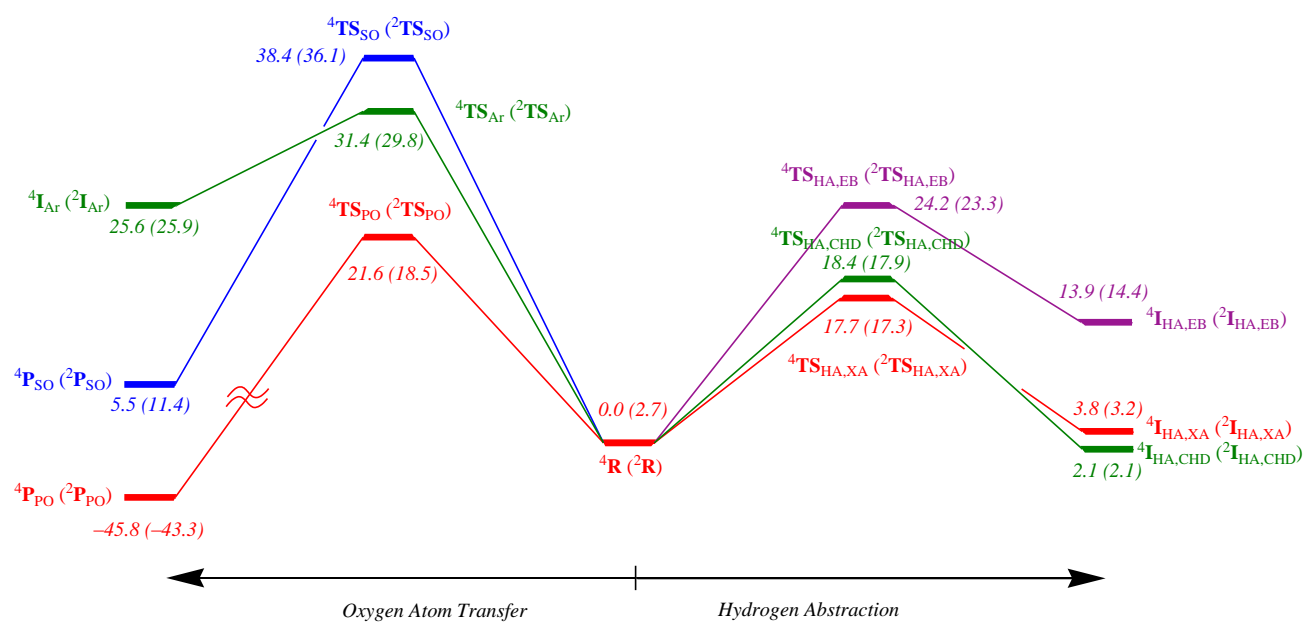

**Figure S15.** Potential energy profile of substrate oxidation (H-abstraction, heteroatom oxidation and aromatic hydroxylation) by  $^{4,2}\mathbf{R}_1$ . Relative energies are in kcal mol<sup>-1</sup> and obtained at UB3LYP/BS2//UB3LYP/BS1 and corrected for ZPE at UB3LYP/BS1. Quartet spin data is in parenthesis

**Cartesian Coordinates:**

**<sup>4</sup>R<sub>1</sub>:**

|    |              |              |              |
|----|--------------|--------------|--------------|
| O  | -0.008663212 | -0.001207327 | 0.003463877  |
| N  | 0.000703795  | 0.000568085  | 2.844903752  |
| C  | 2.527147452  | -0.003309265 | 2.643804203  |
| H  | 3.378708602  | 0.656719304  | 2.424921705  |
| H  | 2.737159207  | -0.474648373 | 3.607952391  |
| C  | 1.256270670  | 0.825258086  | 2.735000630  |
| H  | 1.334686408  | 1.513848516  | 3.591020405  |
| H  | 1.128914708  | 1.429404196  | 1.832773831  |
| C  | -0.120382038 | -0.802314000 | 4.110749578  |
| H  | -0.171493649 | -0.124537237 | 4.978455075  |
| H  | 0.794242018  | -1.396711018 | 4.219612694  |
| C  | -1.346460499 | -1.743604886 | 4.146020672  |
| H  | -2.274212753 | -1.163911563 | 4.111931819  |
| H  | -1.344697293 | -2.212701894 | 5.139245800  |
| C  | -1.408482278 | -2.904183206 | 3.129405803  |
| H  | -0.507018426 | -3.523556736 | 3.225635760  |
| H  | -2.267289919 | -3.543242269 | 3.389541998  |
| C  | -1.132065063 | 0.973531273  | 2.695488735  |
| H  | -0.994868862 | 1.818242164  | 3.384934952  |
| H  | -2.085364428 | 0.508349158  | 2.924518036  |
| H  | -1.151819971 | 1.336266585  | 1.668414539  |
| O  | -1.106745217 | -0.128439991 | -0.793394702 |
| N  | -1.509715253 | -2.503707297 | 1.675276285  |
| C  | -1.434385392 | -3.699850555 | 0.752090212  |
| H  | -2.445413663 | -4.049521380 | 0.508276201  |
| H  | -0.932201307 | -4.517630818 | 1.275900185  |
| C  | -0.678930072 | -3.322088158 | -0.524350301 |
| H  | -0.722431040 | -4.143886659 | -1.254573248 |
| H  | -1.120145235 | -2.429248112 | -0.975344996 |
| C  | -2.784655996 | -1.774837119 | 1.376011492  |
| H  | -3.646275274 | -2.437817297 | 1.537534222  |
| H  | -2.760939692 | -1.431757480 | 0.341781308  |
| H  | -2.892820331 | -0.902165026 | 2.010763615  |
| C  | 2.848718429  | -1.705168997 | -0.868731271 |
| H  | 3.562251450  | -2.508299428 | -0.649567714 |
| H  | 3.248707866  | -1.217264360 | -1.767990765 |
| C  | 2.896178499  | -0.635365301 | 0.244293925  |
| H  | 3.934077735  | -0.274242942 | 0.328205855  |
| H  | 2.259697629  | 0.208949213  | -0.030245400 |
| C  | 1.481010141  | -2.291380133 | -1.279948525 |
| H  | 1.638751749  | -2.992512474 | -2.114796626 |
| H  | 0.827570967  | -1.493983653 | -1.632600009 |
| N  | 0.748645466  | -3.006557907 | -0.167612943 |
| N  | 2.445686479  | -1.104829268 | 1.614845279  |
| C  | 3.308897129  | -2.225021499 | 2.113277965  |
| H  | 4.333830647  | -1.870335627 | 2.292676043  |
| H  | 2.902838722  | -2.608931709 | 3.052499346  |
| H  | 3.349462541  | -3.037665114 | 1.398440592  |
| C  | 1.447597937  | -4.287750663 | 0.186717079  |
| H  | 2.524049106  | -4.177982717 | 0.081850714  |
| H  | 1.232290189  | -4.588837686 | 1.213392027  |
| H  | 1.131701974  | -5.091993000 | -0.491405651 |
| Ni | 0.332898134  | -1.473394366 | 1.320717441  |

**<sup>2</sup>R<sub>1</sub>:**

|   |              |              |             |
|---|--------------|--------------|-------------|
| O | -0.001169811 | -0.000405459 | 0.000959016 |
| N | 0.000303663  | 0.000181056  | 2.837936169 |
| C | 2.527016036  | -0.001455141 | 2.640498651 |
| H | 3.378786836  | 0.658151531  | 2.421548868 |
| H | 2.734785087  | -0.470134753 | 3.606473473 |
| C | 1.255411976  | 0.826029244  | 2.724328218 |
| H | 1.330936316  | 1.520474646  | 3.575653586 |
| H | 1.127544718  | 1.422491925  | 1.817090735 |
| C | -0.123964571 | -0.796738183 | 4.106665917 |
| H | -0.178292628 | -0.115904299 | 4.971588582 |
| H | 0.790492321  | -1.390608165 | 4.221134796 |
| C | -1.350305604 | -1.737662900 | 4.139668151 |
| H | -2.277810216 | -1.157852252 | 4.100751303 |
| H | -1.352594212 | -2.205237064 | 5.133581503 |
| C | -1.408661188 | -2.899795659 | 3.124753199 |
| H | -0.509150253 | -3.521290217 | 3.227316516 |

|    |              |              |              |
|----|--------------|--------------|--------------|
| H  | -2.270187398 | -3.536604396 | 3.380669384  |
| C  | -1.132562443 | 0.972534843  | 2.678070019  |
| H  | -0.987148921 | 1.830668576  | 3.348726739  |
| H  | -2.084663205 | 0.514743010  | 2.926978137  |
| H  | -1.157814035 | 1.312623094  | 1.643366054  |
| O  | -1.077163738 | -0.161608495 | -0.836146473 |
| N  | -1.500763180 | -2.503247979 | 1.668535376  |
| C  | -1.427072815 | -3.703558622 | 0.749937809  |
| H  | -2.438834314 | -4.050498116 | 0.505628243  |
| H  | -0.928594233 | -4.520578935 | 1.278485124  |
| C  | -0.667659572 | -3.330728421 | -0.525221222 |
| H  | -0.708143919 | -4.154903795 | -1.252707164 |
| H  | -1.105122559 | -2.437558934 | -0.979774900 |
| C  | -2.768424813 | -1.765633089 | 1.358284744  |
| H  | -3.635673069 | -2.422214224 | 1.514552267  |
| H  | -2.733356994 | -1.425067715 | 0.323302637  |
| H  | -2.874294223 | -0.891081106 | 1.990644936  |
| C  | 2.857851438  | -1.711179869 | -0.866911914 |
| H  | 3.573282370  | -2.511598577 | -0.643808229 |
| H  | 3.257974537  | -1.224743136 | -1.766898704 |
| C  | 2.898439646  | -0.637472199 | 0.242149796  |
| H  | 3.934057994  | -0.270693321 | 0.327438272  |
| H  | 2.256215294  | 0.201357547  | -0.035973213 |
| C  | 1.492293415  | -2.301123135 | -1.278432947 |
| H  | 1.651942427  | -3.005741811 | -2.109807058 |
| H  | 0.837520577  | -1.506132721 | -1.633728120 |
| N  | 0.759209623  | -3.013566788 | -0.164467289 |
| N  | 2.448377927  | -1.105581920 | 1.614006845  |
| C  | 3.313520660  | -2.223268841 | 2.115161842  |
| H  | 4.337677914  | -1.865990499 | 2.293262481  |
| H  | 2.908718383  | -2.605449853 | 3.055690019  |
| H  | 3.355473972  | -3.037554280 | 1.402255470  |
| C  | 1.459352744  | -4.292644920 | 0.196237218  |
| H  | 2.535794652  | -4.182066681 | 0.091878768  |
| H  | 1.243112426  | -4.590197548 | 1.223870676  |
| H  | 1.144013490  | -5.099866510 | -0.478452776 |
| Ni | 0.335681960  | -1.472554862 | 1.313538199  |

**<sup>4</sup>R<sub>2</sub>:**

|    |              |              |              |
|----|--------------|--------------|--------------|
| Ni | 0.012208649  | 0.241850181  | -0.015959609 |
| N  | -0.068499634 | -0.075255662 | 2.160060801  |
| N  | 2.183816553  | -0.022648108 | 0.262692680  |
| N  | 0.159321206  | -0.082599434 | -2.193677317 |
| N  | -2.130320704 | -0.136693888 | -0.341101348 |
| C  | 1.217209233  | -0.798843108 | 2.446179390  |
| H  | 1.402074443  | -0.837271881 | 3.531086543  |
| H  | 1.099196212  | -1.831549049 | 2.101918391  |
| C  | 2.391603688  | -0.132093508 | 1.751544994  |
| H  | 3.318201708  | -0.686338020 | 1.962634495  |
| H  | 2.533752799  | 0.879608544  | 2.136539609  |
| C  | 2.581299402  | -1.318232072 | -0.400261739 |
| H  | 3.646393838  | -1.506662557 | -0.187572335 |
| H  | 2.011036563  | -2.120995192 | 0.082434924  |
| C  | 2.366556009  | -1.386636529 | -1.918459489 |
| H  | 2.793381492  | -2.344062602 | -2.246769618 |
| H  | 2.963150499  | -0.624077857 | -2.428907697 |
| C  | 0.916188884  | -1.367701336 | -2.420075764 |
| H  | 0.352789919  | -2.169934339 | -1.928488192 |
| H  | 0.915082953  | -1.588162565 | -3.500162844 |
| C  | -1.260178972 | -0.240112915 | -2.675968921 |
| H  | -1.635262946 | 0.756430497  | -2.917239121 |
| H  | -1.278014481 | -0.821824854 | -3.609581735 |
| C  | -2.149575797 | -0.898720542 | -1.636041135 |
| H  | -1.810060174 | -1.918150675 | -1.425313230 |
| H  | -3.178295586 | -0.972427037 | -2.022052230 |
| C  | -2.833560442 | -0.962933780 | 0.705603927  |
| H  | -2.493302156 | -1.998770410 | 0.590277697  |
| H  | -3.912315235 | -0.951564280 | 0.484895828  |
| C  | -2.589387028 | -0.520199927 | 2.148678562  |
| H  | -2.774334886 | 0.551572636  | 2.274931141  |
| H  | -3.336140402 | -1.023309828 | 2.776607082  |

|   |              |              |              |
|---|--------------|--------------|--------------|
| C | -1.209438515 | -0.914440080 | 2.675999745  |
| H | -1.006261805 | -1.954489160 | 2.394849445  |
| H | -1.198997858 | -0.870026402 | 3.776226202  |
| C | -0.086110121 | 1.255315519  | 2.857693003  |
| H | 0.007027240  | 1.113393908  | 3.944144081  |
| H | 0.724633644  | 1.886180638  | 2.499683337  |
| H | -1.011211471 | 1.779477122  | 2.628751175  |
| C | 3.029489517  | 1.120368117  | -0.218367935 |
| H | 4.066800810  | 1.000857552  | 0.125345553  |
| H | 2.611887611  | 2.052557820  | 0.161097501  |
| H | 3.031671903  | 1.172727038  | -1.302539224 |
| C | 0.763938436  | 1.052896516  | -2.967271239 |
| H | 1.828155969  | 1.134620578  | -2.769879841 |
| H | 0.292352569  | 1.983933839  | -2.653858630 |
| H | 0.622265669  | 0.899556156  | -4.046529313 |
| C | -2.850631616 | 1.172963876  | -0.494852158 |
| H | -2.362493603 | 1.792828594  | -1.243799344 |
| H | -2.811731590 | 1.727394471  | 0.440031788  |
| H | -3.896661427 | 0.996810213  | -0.784657569 |
| O | 0.181274491  | 2.217696023  | -0.204257735 |
| O | -0.673114641 | 3.015793171  | 0.478506847  |

<sup>2</sup>R<sub>2</sub>:

|    |              |              |              |
|----|--------------|--------------|--------------|
| Ni | 0.010873786  | 0.246978793  | -0.015120881 |
| N  | -0.067661113 | -0.075588960 | 2.156647821  |
| N  | 2.182341336  | -0.025029441 | 0.259065994  |
| N  | 0.162169153  | -0.085102868 | -2.191256488 |
| N  | -2.127182103 | -0.137025043 | -0.341211441 |
| C  | 1.219309529  | -0.796961112 | 2.445008490  |
| H  | 1.403353746  | -0.831719949 | 3.529990440  |
| H  | 1.103005154  | -1.830979267 | 2.103809987  |
| C  | 2.391603616  | -0.129303222 | 1.748193060  |
| H  | 3.319859901  | -0.680336821 | 1.959828661  |
| H  | 2.530999488  | 0.884040628  | 2.129625101  |
| C  | 2.582468306  | -1.321418377 | -0.400884678 |
| H  | 3.647816188  | -1.507480619 | -0.188030103 |
| H  | 2.014050597  | -2.124299919 | 0.084193828  |
| C  | 2.367210664  | -1.394013887 | -1.918869686 |
| H  | 2.790595882  | -2.353940925 | -2.244307365 |
| H  | 2.966595564  | -0.635256004 | -2.431528404 |
| C  | 0.917021257  | -1.370928250 | -2.421087435 |
| H  | 0.351758776  | -2.173711042 | -1.932159232 |
| H  | 0.915964587  | -1.588597435 | -3.501605945 |
| C  | -1.257295486 | -0.237752491 | -2.675511108 |
| H  | -1.629441067 | 0.760472791  | -2.913958490 |
| H  | -1.275217292 | -0.816671808 | -3.610726184 |
| C  | -2.148439460 | -0.897074134 | -1.637833515 |
| H  | -1.811473665 | -1.917874628 | -1.429127533 |
| H  | -3.177456401 | -0.967242252 | -2.023170993 |
| C  | -2.831731974 | -0.963974641 | 0.704534153  |
| H  | -2.492283359 | -2.000082443 | 0.588652349  |
| H  | -3.910020768 | -0.951227626 | 0.482450155  |
| C  | -2.588404253 | -0.521873579 | 2.147763214  |
| H  | -2.774017901 | 0.549637756  | 2.274484429  |
| H  | -3.334595814 | -1.026146733 | 2.775370140  |
| C  | -1.208008301 | -0.915461178 | 2.674025700  |
| H  | -1.004483239 | -1.955716106 | 2.393641611  |
| H  | -1.196072666 | -0.869774659 | 3.774017229  |
| C  | -0.087028794 | 1.256785440  | 2.852286517  |
| H  | -0.001657169 | 1.114748741  | 3.939170848  |
| H  | 0.727472026  | 1.884805103  | 2.498236390  |
| H  | -1.007837760 | 1.783837664  | 2.613877486  |
| C  | 3.021294267  | 1.122519206  | -0.225022154 |
| H  | 4.052884661  | 1.023081115  | 0.140802500  |
| H  | 2.580216359  | 2.053863241  | 0.129434713  |
| H  | 3.045015087  | 1.155622079  | -1.309649090 |
| C  | 0.768516985  | 1.055518539  | -2.957098901 |
| H  | 1.837234178  | 1.118657755  | -2.778291395 |
| H  | 0.315651202  | 1.986601965  | -2.617036576 |
| H  | 0.605602853  | 0.921308137  | -4.035675745 |
| C  | -2.845592750 | 1.174697003  | -0.492780165 |
| H  | -2.360175126 | 1.791652187  | -1.245740392 |
| H  | -2.796620892 | 1.731889730  | 0.439749318  |



|   |              |             |              |
|---|--------------|-------------|--------------|
| H | -3.893461579 | 0.998991427 | -0.775385284 |
| O | 0.183117622  | 2.213930560 | -0.205560143 |
| O | -0.686745393 | 3.005245018 | 0.491131805  |

<sup>4</sup>R<sub>EB</sub>:

|   |              |              |              |
|---|--------------|--------------|--------------|
| O | -0.401695111 | -0.262950824 | 0.080651286  |
| N | -0.258215282 | -0.122432480 | 2.889056532  |
| C | 2.237485179  | 0.196101038  | 2.571145480  |
| H | 2.983349305  | 0.951031627  | 2.283439989  |
| H | 2.546303604  | -0.192814543 | 3.545520055  |
| C | 0.871065155  | 0.851751305  | 2.682206557  |
| H | 0.890907311  | 1.589239153  | 3.500158817  |
| H | 0.626566410  | 1.385447070  | 1.760033204  |
| C | -0.222229253 | -0.869588374 | 4.193218232  |
| H | -0.321245235 | -0.161255386 | 5.031974475  |
| H | 0.763000840  | -1.342301298 | 4.284755221  |
| C | -1.320873011 | -1.949444276 | 4.325508774  |
| H | -2.313202546 | -1.488751218 | 4.300643455  |
| H | -1.226770547 | -2.362791601 | 5.338907890  |
| C | -1.274584824 | -3.160464185 | 3.369088249  |
| H | -0.304742804 | -3.666061236 | 3.466597319  |
| H | -2.045666830 | -3.879852856 | 3.688016704  |
| C | -1.514026021 | 0.690868903  | 2.751996817  |
| H | -1.450846180 | 1.584020969  | 3.389077064  |
| H | -2.390032488 | 0.128802788  | 3.057912517  |
| H | -1.636780085 | 0.990616248  | 1.712430984  |
| O | -1.354976159 | -0.629257047 | -0.821523175 |
| N | -1.459185380 | -2.855132798 | 1.900170030  |
| C | -1.265018566 | -4.085291885 | 1.042448600  |
| H | -2.231550493 | -4.572647726 | 0.861662443  |
| H | -0.644487537 | -4.800626968 | 1.589111260  |
| C | -0.608808500 | -3.692570124 | -0.282937278 |
| H | -0.564377395 | -4.557845115 | -0.961098671 |
| H | -1.176829170 | -2.894459355 | -0.767958946 |
| C | -2.814611170 | -2.291891541 | 1.598408423  |
| H | -3.591807698 | -3.035259377 | 1.825583621  |
| H | -2.859974404 | -2.015304803 | 0.545123212  |
| H | -3.006501496 | -1.395734204 | 2.176880424  |
| C | 2.648244644  | -1.636248308 | -0.866993817 |
| H | 3.475871275  | -2.319297443 | -0.641809363 |
| H | 2.939402579  | -1.149394800 | -1.807797452 |
| C | 2.590201367  | -0.508861442 | 0.187695194  |
| H | 3.569816626  | -0.003859434 | 0.202834455  |
| H | 1.830827629  | 0.223332877  | -0.095946597 |
| C | 1.361985514  | -2.429301515 | -1.184025168 |
| H | 1.587922526  | -3.152811829 | -1.983558939 |
| H | 0.590091397  | -1.755715234 | -1.554770752 |
| N | 0.774356821  | -3.167866731 | -0.003816831 |
| N | 2.266903652  | -0.959176008 | 1.599851542  |
| C | 3.298841769  | -1.920756602 | 2.108360892  |
| H | 4.270005997  | -1.417972443 | 2.220898028  |
| H | 2.990064148  | -2.306191410 | 3.083244198  |
| H | 3.424338938  | -2.756964827 | 1.431682638  |
| C | 1.653694381  | -4.319844107 | 0.389387121  |
| H | 2.700742249  | -4.072452436 | 0.233313203  |
| H | 1.516855879  | -4.586401516 | 1.438868117  |
| H | 1.427492547  | -5.197746620 | -0.230871933 |
| H | -5.924430344 | -0.394415529 | 0.187481434  |
| C | -5.378404532 | 0.524219071  | 0.383204301  |
| C | -5.673555882 | 1.284629771  | 1.523219460  |
| C | -4.396320420 | 0.955468268  | -0.515799737 |
| C | -4.980220724 | 2.479378118  | 1.753067866  |
| H | -6.445101074 | 0.958465144  | 2.213959546  |
| C | -3.692806864 | 2.155543344  | -0.299338930 |
| H | -4.171283205 | 0.362010985  | -1.397211432 |
| C | -4.000388301 | 2.908728932  | 0.847990460  |
| H | -5.211775902 | 3.083231018  | 2.625517537  |
| H | -3.476534010 | 3.844787532  | 1.025050711  |
| C | -2.663048487 | 2.638177200  | -1.304702161 |
| H | -2.089219860 | 1.778436909  | -1.671392191 |
| H | -1.949881257 | 3.307507889  | -0.804853993 |

|    |              |              |              |
|----|--------------|--------------|--------------|
| C  | -3.295619151 | 3.382010947  | -2.502391063 |
| H  | -2.523688832 | 3.711787598  | -3.207243388 |
| H  | -3.993182784 | 2.732218862  | -3.043025016 |
| H  | -3.852651173 | 4.264742009  | -2.168727972 |
| Ni | 0.211581268  | -1.620922583 | 1.423463076  |

<sup>4</sup>R<sub>XA</sub>:

|    |              |              |              |
|----|--------------|--------------|--------------|
| Ni | -0.224702807 | -1.256795224 | 1.182897538  |
| O  | -0.440321782 | 0.494149895  | 0.226406630  |
| N  | 0.114938981  | -0.055537702 | 2.940719501  |
| C  | 2.476479522  | -0.571109756 | 2.176783270  |
| H  | 3.411212463  | -0.082346131 | 1.866258155  |
| H  | 2.735583358  | -1.249369208 | 2.994583063  |
| C  | 1.494727969  | 0.480916674  | 2.665071868  |
| H  | 1.902119906  | 0.963629019  | 3.567621965  |
| H  | 1.357745601  | 1.256050896  | 1.906344533  |
| C  | 0.029409925  | -1.038953982 | 4.074607085  |
| H  | 0.317322266  | -0.546855160 | 5.018204653  |
| H  | 0.763056580  | -1.831747409 | 3.887534266  |
| C  | -1.370035377 | -1.671785464 | 4.253510377  |
| H  | -2.106969570 | -0.903151527 | 4.507004283  |
| H  | -1.308017932 | -2.307318639 | 5.147333942  |
| C  | -1.913810278 | -2.576692265 | 3.126463697  |
| H  | -1.203502357 | -3.392388281 | 2.938068425  |
| H  | -2.848926946 | -3.040072845 | 3.479694982  |
| C  | -0.738612543 | 1.152728054  | 3.190678963  |
| H  | -0.262881671 | 1.800109481  | 3.940800516  |
| H  | -1.718436817 | 0.874952058  | 3.565306581  |
| H  | -0.856671021 | 1.697592783  | 2.254705411  |
| O  | -1.607894549 | 0.718752496  | -0.439962271 |
| N  | -2.164539079 | -1.902589630 | 1.798142709  |
| C  | -2.570998996 | -2.893134456 | 0.726939738  |
| H  | -3.664978125 | -2.954601064 | 0.670434998  |
| H  | -2.209457529 | -3.884832669 | 1.012404257  |
| C  | -1.992871356 | -2.462279378 | -0.621226736 |
| H  | -2.376934636 | -3.092570165 | -1.434188729 |
| H  | -2.266455071 | -1.426091425 | -0.835188982 |
| C  | -3.234945403 | -0.858453286 | 1.883883116  |
| H  | -4.196091024 | -1.321819610 | 2.147936995  |
| H  | -3.316272462 | -0.355306197 | 0.920237409  |
| H  | -2.991454110 | -0.110388701 | 2.630273986  |
| C  | 1.704945986  | -1.616843163 | -1.517454614 |
| H  | 2.225294707  | -2.580525217 | -1.572765955 |
| H  | 2.039790421  | -1.070625086 | -2.409807402 |
| C  | 2.221667329  | -0.805755660 | -0.309027096 |
| H  | 3.313752191  | -0.694795476 | -0.410208792 |
| H  | 1.773041350  | 0.190468133  | -0.314877251 |
| C  | 0.183730244  | -1.810684273 | -1.690781881 |
| H  | 0.004739630  | -2.366685223 | -2.622768186 |
| H  | -0.305815984 | -0.842213716 | -1.785428851 |
| N  | -0.488147016 | -2.534895371 | -0.545263771 |
| N  | 1.931906713  | -1.414344544 | 1.050509384  |
| C  | 2.561829683  | -2.768195463 | 1.182186896  |
| H  | 3.658069976  | -2.685523080 | 1.169017991  |
| H  | 2.257242941  | -3.221959315 | 2.128666770  |
| H  | 2.258624780  | -3.422348248 | 0.374193964  |
| C  | -0.083500613 | -3.981379570 | -0.531516940 |
| H  | 0.947532624  | -4.093770339 | -0.858060539 |
| H  | -0.176017853 | -4.412429393 | 0.467143062  |
| H  | -0.712549417 | -4.554530245 | -1.225041188 |
| H  | -0.888462221 | 0.380878606  | -5.823488852 |
| C  | -1.100046280 | -0.658401331 | -5.588328651 |
| C  | -0.290865566 | -1.670731413 | -6.116053578 |
| C  | -2.191289478 | -0.958028789 | -4.757880996 |
| C  | -0.571616702 | -3.013552814 | -5.824613739 |
| H  | 0.543106687  | -1.416433248 | -6.761350358 |
| C  | -2.451017443 | -2.309394857 | -4.490873946 |
| C  | -1.661213323 | -3.337610417 | -5.011389816 |
| H  | 0.040845397  | -3.804431140 | -6.244724471 |
| C  | -4.420158525 | -0.418803166 | -3.727209945 |
| H  | -1.927007976 | -4.365857176 | -4.793681560 |
| C  | -4.591020533 | -1.789025013 | -3.491615548 |
| C  | -5.533242067 | 0.415531384  | -3.542895309 |

|   |              |              |              |
|---|--------------|--------------|--------------|
| C | -5.808924041 | -2.329531435 | -3.075821980 |
| H | -5.429370082 | 1.480374991  | -3.730662133 |
| C | -6.762863033 | -0.101843608 | -3.122823635 |
| C | -6.899206975 | -1.476849173 | -2.885484945 |
| H | -5.888188014 | -3.400607436 | -2.929242317 |
| H | -7.611203782 | 0.560570893  | -2.988977216 |
| H | -7.853446618 | -1.885084953 | -2.569817052 |
| C | -3.061082147 | 0.118370477  | -4.135336157 |
| H | -3.182223781 | 0.953741959  | -4.835901691 |
| H | -2.553596495 | 0.539462018  | -3.250802372 |
| O | -3.523877761 | -2.700100500 | -3.665388532 |

<sup>4</sup>R<sub>2XA</sub>:

|    |              |              |              |
|----|--------------|--------------|--------------|
| Ni | 0.011413484  | -0.137740482 | 0.194454960  |
| N  | 0.086051566  | -0.263938636 | 2.395931814  |
| N  | 2.215235860  | -0.203075753 | 0.355082239  |
| N  | 0.059617505  | -0.651382362 | -1.939611978 |
| N  | -2.098929604 | -0.730028582 | 0.055162073  |
| C  | 1.449325793  | -0.836913791 | 2.662319055  |
| H  | 1.699347153  | -0.749682946 | 3.731374395  |
| H  | 1.410994675  | -1.905450156 | 2.426592311  |
| C  | 2.512707450  | -0.141570410 | 1.831054229  |
| H  | 3.499133735  | -0.584808121 | 2.034672198  |
| H  | 2.576859168  | 0.913211220  | 2.105860800  |
| C  | 2.676264727  | -1.525855387 | -0.204233076 |
| H  | 3.763913698  | -1.612983052 | -0.046116764 |
| H  | 2.201504455  | -2.315995223 | 0.389931662  |
| C  | 2.375541490  | -1.761122760 | -1.691192760 |
| H  | 2.854799188  | -2.713722037 | -1.955189309 |
| H  | 2.878041128  | -1.012263661 | -2.311294819 |
| C  | 0.899646137  | -1.894695532 | -2.092588880 |
| H  | 0.431596215  | -2.683849034 | -1.491716285 |
| H  | 0.851253256  | -2.220252347 | -3.144681220 |
| C  | -1.369574472 | -0.954020925 | -2.319053557 |
| H  | -1.839077891 | -0.013635601 | -2.616862776 |
| H  | -1.389643308 | -1.614531255 | -3.198980616 |
| C  | -2.134283855 | -1.594792895 | -1.174299578 |
| H  | -1.699953344 | -2.564754095 | -0.909195813 |
| H  | -3.175698841 | -1.778062062 | -1.481223113 |
| C  | -2.659474018 | -1.522668439 | 1.206915769  |
| H  | -2.230197443 | -2.530480661 | 1.154695076  |
| H  | -3.745334419 | -1.626307448 | 1.055779727  |
| C  | -2.377854807 | -0.936339338 | 2.590555994  |
| H  | -2.661050334 | 0.120057774  | 2.641183172  |
| H  | -3.033103974 | -1.451214100 | 3.305274472  |
| C  | -0.937577026 | -1.153042092 | 3.055383842  |
| H  | -0.651944889 | -2.191421922 | 2.849601431  |
| H  | -0.866417647 | -1.009103134 | 4.144998406  |
| C  | -0.022620188 | 1.118413340  | 2.973049337  |
| H  | 0.136046817  | 1.087486305  | 4.060961958  |
| H  | 0.706785470  | 1.782689129  | 2.514748969  |
| H  | -1.003423447 | 1.533878008  | 2.752586349  |
| C  | 2.941010675  | 0.944645463  | -0.284731621 |
| H  | 3.996910519  | 0.947369501  | 0.021389055  |
| H  | 2.458711117  | 1.875553973  | 0.012141016  |
| H  | 2.899274618  | 0.876256822  | -1.367109351 |
| C  | 0.530940415  | 0.443212278  | -2.851517906 |
| H  | 1.585586375  | 0.650163610  | -2.699785542 |
| H  | -0.028543090 | 1.351773783  | -2.635904235 |
| H  | 0.377937887  | 0.156713342  | -3.901357161 |
| C  | -2.939959738 | 0.498370896  | -0.153050125 |
| H  | -2.571386357 | 1.078017689  | -0.995341357 |
| H  | -2.881775610 | 1.139622641  | 0.723477152  |
| H  | -3.984824539 | 0.213527798  | -0.340238002 |
| O  | 0.036404162  | 1.824483004  | -0.152639985 |
| O  | -0.864956477 | 2.618820433  | 0.476904389  |
| H  | -6.755762028 | 4.663362529  | -0.521460309 |
| C  | -5.960845802 | 4.199481669  | -1.095410698 |
| C  | -4.696016069 | 4.797023340  | -1.144501519 |
| C  | -6.202740724 | 3.010798209  | -1.797055497 |
| C  | -3.652943773 | 4.218640132  | -1.881589465 |

|   |              |             |              |
|---|--------------|-------------|--------------|
| H | -4.511781950 | 5.721929852 | -0.605859978 |
| C | -5.181994439 | 2.424633888 | -2.553009321 |
| H | -7.186090786 | 2.553159327 | -1.773509676 |
| C | -3.928471696 | 3.035587785 | -2.580344886 |
| C | -2.250734873 | 4.795076212 | -1.938387267 |
| H | -5.347404957 | 1.525865068 | -3.136278131 |
| O | -2.916113231 | 2.410512415 | -3.352697526 |
| C | -1.580747803 | 4.456421753 | -3.256547801 |
| H | -2.277658356 | 5.880441570 | -1.791448369 |
| C | -1.930116320 | 3.265518995 | -3.907853775 |
| C | -0.606943343 | 5.266208802 | -3.858120878 |
| C | -1.344553010 | 2.871781445 | -5.111057719 |
| H | -0.328105120 | 6.200304212 | -3.379273433 |
| C | 0.003377553  | 4.887174066 | -5.059443575 |
| C | -0.364012159 | 3.688132359 | -5.684792141 |
| H | -1.677217364 | 1.957497211 | -5.589442278 |
| H | 0.752686418  | 5.528606047 | -5.510769852 |
| H | 0.094375131  | 3.399808384 | -6.624880809 |
| H | -1.654347454 | 4.379292625 | -1.109185977 |

<sup>4</sup>R<sub>CHD</sub>:

|    |              |              |              |
|----|--------------|--------------|--------------|
| Ni | 0.145921992  | -0.424299784 | 0.094680816  |
| O  | 0.565735931  | -1.195922888 | 1.898546087  |
| N  | 2.257784821  | -0.015110933 | -0.017003379 |
| C  | 1.313916741  | 2.209932632  | 0.746321045  |
| H  | 1.382283342  | 2.944596621  | 1.561415523  |
| H  | 1.493728867  | 2.756899632  | -0.183573090 |
| C  | 2.379363410  | 1.143872637  | 0.937133330  |
| H  | 3.374769196  | 1.606907832  | 0.847099114  |
| H  | 2.304930253  | 0.705325981  | 1.935761593  |
| C  | 2.482680539  | 0.325237114  | -1.463988589 |
| H  | 3.516010034  | 0.681202675  | -1.607817925 |
| H  | 1.816427163  | 1.156967291  | -1.721168505 |
| C  | 2.226066062  | -0.852234140 | -2.432713942 |
| H  | 2.926318545  | -1.669770713 | -2.234424983 |
| H  | 2.493481814  | -0.490000247 | -3.434662832 |
| C  | 0.788254860  | -1.402148722 | -2.552335507 |
| H  | 0.108468183  | -0.587737011 | -2.835032239 |
| H  | 0.768943183  | -2.137019595 | -3.372940817 |
| C  | 3.243531909  | -1.035967048 | 0.470634020  |
| H  | 4.229113467  | -0.569694198 | 0.609437948  |
| H  | 3.357897864  | -1.848093894 | -0.240159715 |
| H  | 2.889411754  | -1.439325589 | 1.418683933  |
| O  | 0.163784520  | -2.469073380 | 2.175685043  |
| N  | 0.212795630  | -2.035047607 | -1.306366863 |
| C  | -1.238710866 | -2.419895893 | -1.489276242 |
| H  | -1.311210810 | -3.466291521 | -1.811837315 |
| H  | -1.665646827 | -1.809025226 | -2.289222005 |
| C  | -1.997446462 | -2.210214523 | -0.177213216 |
| H  | -3.026125281 | -2.590973268 | -0.263271709 |
| H  | -1.496999251 | -2.733997302 | 0.641580520  |
| C  | 0.964666695  | -3.262433040 | -0.891146420 |
| H  | 0.878939012  | -4.039503586 | -1.663850661 |
| H  | 0.555566377  | -3.626981916 | 0.051539429  |
| H  | 2.014458250  | -3.041295036 | -0.733222536 |
| C  | -2.166232731 | 0.978323637  | 2.055169190  |
| H  | -2.844844850 | 1.671098403  | 1.543004748  |
| H  | -2.480467688 | 0.993033960  | 3.106469211  |
| C  | -0.727422268 | 1.536266701  | 2.043771004  |
| H  | -0.746129307 | 2.541122761  | 2.495637111  |
| H  | -0.083059515 | 0.902678220  | 2.656703051  |
| C  | -2.407438536 | -0.469676279 | 1.581956548  |
| H  | -3.477402923 | -0.701097187 | 1.702392636  |
| H  | -1.848832776 | -1.161856894 | 2.210356080  |
| N  | -2.002453416 | -0.741989630 | 0.150656228  |
| N  | -0.083535257 | 1.646034282  | 0.672655787  |
| C  | -0.868098659 | 2.561797056  | -0.218444338 |
| H  | -0.827249777 | 3.593023982  | 0.160337362  |
| H  | -0.445933695 | 2.543107322  | -1.226487194 |
| H  | -1.906744618 | 2.260495723  | -0.273525054 |
| C  | -2.927061645 | -0.041108815 | -0.802524670 |
| H  | -3.258205936 | 0.906303151  | -0.384900057 |
| H  | -2.440954458 | 0.156320069  | -1.759706450 |

|   |              |              |              |
|---|--------------|--------------|--------------|
| H | -3.822086009 | -0.652620256 | -0.979967788 |
| C | -0.494172024 | 0.138262101  | 5.798076393  |
| C | -1.198517445 | 1.260111782  | 6.012053581  |
| C | -2.630269375 | -1.137383267 | 5.438223816  |
| C | -3.337074792 | -0.016697260 | 5.652437329  |
| C | -1.126131535 | -1.214178948 | 5.563983354  |
| H | -0.861604708 | -1.892773738 | 6.393652045  |
| H | -0.688091168 | -1.689530674 | 4.671862560  |
| H | -3.146564514 | -2.062104540 | 5.186121493  |
| H | -4.422542812 | -0.035694273 | 5.572446837  |
| H | -0.680842144 | 2.198579356  | 6.202795321  |
| H | 0.593845255  | 0.170102976  | 5.815449808  |
| C | -2.709460730 | 1.301290100  | 6.047098251  |
| H | -3.049866351 | 1.585563747  | 7.057809278  |
| H | -3.083965529 | 2.111320422  | 5.398119636  |

<sup>2</sup>R<sub>EB</sub>:

|   |              |              |              |
|---|--------------|--------------|--------------|
| O | -0.356929954 | -0.274083895 | 0.044124583  |
| N | -0.231734838 | -0.108507719 | 2.854993443  |
| C | 2.264821751  | 0.203172572  | 2.539806393  |
| H | 3.012806713  | 0.952576408  | 2.243689742  |
| H | 2.569596975  | -0.172309127 | 3.520723173  |
| C | 0.898879201  | 0.861819995  | 2.634979273  |
| H | 0.915960398  | 1.612953911  | 3.440264528  |
| H | 0.656619173  | 1.378297281  | 1.702450692  |
| C | -0.199733491 | -0.837404520 | 4.169319901  |
| H | -0.301283743 | -0.117947269 | 4.998034855  |
| H | 0.785238344  | -1.308931984 | 4.270626317  |
| C | -1.299077753 | -1.915217350 | 4.311610879  |
| H | -2.291245630 | -1.454722599 | 4.279847229  |
| H | -1.206948368 | -2.318040895 | 5.329384554  |
| C | -1.251342391 | -3.135687690 | 3.367477490  |
| H | -0.281839905 | -3.641027009 | 3.471766094  |
| H | -2.023045060 | -3.851770274 | 3.691717985  |
| C | -1.486714268 | 0.704428836  | 2.700932960  |
| H | -1.415628913 | 1.616942730  | 3.308668683  |
| H | -2.362071306 | 0.155863050  | 3.032550244  |
| H | -1.614082937 | 0.970409594  | 1.652830487  |
| O | -1.326163783 | -0.659844831 | -0.848072046 |
| N | -1.433481015 | -2.845337234 | 1.894788351  |
| C | -1.243750607 | -4.086348534 | 1.050753328  |
| H | -2.212727611 | -4.569468746 | 0.872760584  |
| H | -0.629111767 | -4.799390591 | 1.607046842  |
| C | -0.582144811 | -3.709452450 | -0.276183283 |
| H | -0.538619834 | -4.581012247 | -0.946100998 |
| H | -1.143804686 | -2.911558453 | -0.769507195 |
| C | -2.786404734 | -2.279862873 | 1.584237622  |
| H | -3.566706935 | -3.015578785 | 1.825099027  |
| H | -2.829699708 | -2.022212815 | 0.526113775  |
| H | -2.973200334 | -1.372185826 | 2.145719958  |
| C | 2.684571609  | -1.673576268 | -0.872589194 |
| H | 3.508658472  | -2.357051503 | -0.635853099 |
| H | 2.981144616  | -1.199333638 | -1.818095969 |
| C | 2.624901716  | -0.533185583 | 0.167420591  |
| H | 3.604830056  | -0.029088101 | 0.180785192  |
| H | 1.866237927  | 0.195114567  | -0.128233553 |
| C | 1.395629126  | -2.463713933 | -1.184144543 |
| H | 1.618740282  | -3.197010177 | -1.975370356 |
| H | 0.626951851  | -1.789925387 | -1.560982740 |
| N | 0.802678858  | -3.187614837 | 0.002993866  |
| N | 2.295588160  | -0.965461673 | 1.584320245  |
| C | 3.322495272  | -1.923626799 | 2.109425750  |
| H | 4.294652446  | -1.422320342 | 2.218946910  |
| H | 3.009136267  | -2.295121025 | 3.088326289  |
| H | 3.447930666  | -2.769023315 | 1.444179143  |
| C | 1.676163014  | -4.338273338 | 0.412819392  |
| H | 2.724885062  | -4.096499474 | 0.259226052  |
| H | 1.533082985  | -4.593210961 | 1.464440776  |
| H | 1.449350343  | -5.221832576 | -0.198975230 |
| H | -5.880387284 | -0.419684829 | 0.195139022  |
| C | -5.360037296 | 0.511629622  | 0.400891684  |

|    |              |              |              |
|----|--------------|--------------|--------------|
| C  | -5.715212658 | 1.279536502  | 1.518647751  |
| C  | -4.350649197 | 0.951032190  | -0.463269824 |
| C  | -5.054690140 | 2.490099364  | 1.761059010  |
| H  | -6.507083850 | 0.946304624  | 2.182400664  |
| C  | -3.679864342 | 2.167835959  | -0.233912989 |
| H  | -4.077241858 | 0.351808290  | -1.326861015 |
| C  | -4.047965901 | 2.928291361  | 0.890425198  |
| H  | -5.331771591 | 3.099001814  | 2.616477746  |
| H  | -3.549853694 | 3.876506703  | 1.076673319  |
| C  | -2.618293120 | 2.655977522  | -1.203134748 |
| H  | -1.996323493 | 1.806510892  | -1.510877787 |
| H  | -1.957563086 | 3.369570452  | -0.692581239 |
| C  | -3.215911970 | 3.333342588  | -2.456770898 |
| H  | -2.421625161 | 3.668486493  | -3.133649548 |
| H  | -3.860067402 | 2.638613158  | -3.007704099 |
| H  | -3.821701400 | 4.204518682  | -2.183263754 |
| Ni | 0.237024270  | -1.619701885 | 1.403174165  |

<sup>2</sup>R<sub>XA</sub>:

|    |              |              |              |
|----|--------------|--------------|--------------|
| Ni | -0.239132728 | -1.256456593 | 1.136670001  |
| O  | -0.519277440 | 0.485486954  | 0.183526384  |
| N  | 0.090464912  | -0.059803554 | 2.895641919  |
| C  | 2.455704511  | -0.483215173 | 2.090028452  |
| H  | 3.365631211  | 0.040286917  | 1.763234579  |
| H  | 2.754682787  | -1.152222055 | 2.901876459  |
| C  | 1.443165911  | 0.530633852  | 2.595212977  |
| H  | 1.846565980  | 1.029988827  | 3.490286517  |
| H  | 1.260871188  | 1.297798908  | 1.837897775  |
| C  | 0.064674878  | -1.049441112 | 4.026936081  |
| H  | 0.351150303  | -0.550115990 | 4.966998792  |
| H  | 0.825172636  | -1.812351437 | 3.822780390  |
| C  | -1.305200757 | -1.737590004 | 4.228922272  |
| H  | -2.066139542 | -1.000306489 | 4.503553020  |
| H  | -1.200199097 | -2.377263455 | 5.115752642  |
| C  | -1.836098419 | -2.653995274 | 3.105154941  |
| H  | -1.098821950 | -3.440331609 | 2.895314995  |
| H  | -2.745240415 | -3.156439873 | 3.472102308  |
| C  | -0.805054982 | 1.114570866  | 3.162114268  |
| H  | -0.334678781 | 1.786675132  | 3.893448166  |
| H  | -1.760902961 | 0.799502273  | 3.568066468  |
| H  | -0.971197989 | 1.645195481  | 2.225128766  |
| O  | -1.730596434 | 0.672672843  | -0.436082678 |
| N  | -2.139486280 | -1.979337069 | 1.787846823  |
| C  | -2.532482039 | -2.976515247 | 0.717204990  |
| H  | -3.624691902 | -3.071359837 | 0.678379094  |
| H  | -2.136007411 | -3.958293168 | 0.990537951  |
| C  | -1.990122505 | -2.518627197 | -0.636363745 |
| H  | -2.365998214 | -3.157415471 | -1.446212386 |
| H  | -2.300048037 | -1.490048478 | -0.838617566 |
| C  | -3.244870604 | -0.974583959 | 1.902869054  |
| H  | -4.184230831 | -1.475507491 | 2.176124452  |
| H  | -3.357889835 | -0.463733726 | 0.946411348  |
| H  | -3.016400962 | -0.227323184 | 2.654624907  |
| C  | 1.662777490  | -1.550285807 | -1.590518593 |
| H  | 2.214778945  | -2.495653444 | -1.655917305 |
| H  | 1.962342965  | -0.992927338 | -2.488436683 |
| C  | 2.168798500  | -0.722144953 | -0.390440754 |
| H  | 3.254346776  | -0.570620388 | -0.506808558 |
| H  | 1.681713995  | 0.255989518  | -0.387377703 |
| C  | 0.146796989  | -1.793438768 | -1.737523339 |
| H  | -0.030119846 | -2.352431639 | -2.666938613 |
| H  | -0.374473863 | -0.840807227 | -1.817867964 |
| N  | -0.482527408 | -2.542754171 | -0.583146550 |
| N  | 1.922014242  | -1.343856991 | 0.971805764  |
| C  | 2.599211904  | -2.676030491 | 1.089920722  |
| H  | 3.691548991  | -2.556497234 | 1.056210913  |
| H  | 2.328201738  | -3.140512714 | 2.041470602  |
| H  | 2.303007360  | -3.339269079 | 0.286755038  |
| C  | -0.031075983 | -3.975404787 | -0.582377143 |
| H  | 0.997424949  | -4.052864306 | -0.926605371 |
| H  | -0.093591048 | -4.414197813 | 0.415274409  |
| H  | -0.652446939 | -4.564718776 | -1.269128182 |
| H  | -0.670600123 | 0.253510333  | -5.584585610 |

|   |              |              |              |
|---|--------------|--------------|--------------|
| C | -0.952455845 | -0.774404302 | -5.374194694 |
| C | -0.163053607 | -1.825156540 | -5.855194688 |
| C | -2.113824768 | -1.018724304 | -4.624116355 |
| C | -0.535280660 | -3.153322000 | -5.598743767 |
| H | 0.725020367  | -1.611552722 | -6.440276368 |
| C | -2.465117469 | -2.356088415 | -4.391697503 |
| C | -1.696403583 | -3.422199544 | -4.868374926 |
| H | 0.060519464  | -3.973636055 | -5.984873076 |
| C | -4.360393578 | -0.363216045 | -3.697612432 |
| H | -2.032965341 | -4.435689386 | -4.681215693 |
| C | -4.621195903 | -1.723945278 | -3.493103195 |
| C | -5.427625769 | 0.533419479  | -3.534472309 |
| C | -5.883369725 | -2.196692622 | -3.129444826 |
| H | -5.253439539 | 1.593121442  | -3.697361655 |
| C | -6.699679526 | 0.084798618  | -3.166021037 |
| C | -6.926648598 | -1.283276789 | -2.960081174 |
| H | -6.030671360 | -3.263184035 | -3.003888312 |
| H | -7.510511682 | 0.795237419  | -3.047247806 |
| H | -7.913723209 | -1.638301216 | -2.683701015 |
| C | -2.960739453 | 0.102936118  | -4.051571584 |
| H | -3.012646423 | 0.933344787  | -4.766657107 |
| H | -2.474556191 | 0.513558136  | -3.150518554 |
| O | -3.607295113 | -2.697555700 | -3.645372828 |

<sup>2</sup>R<sub>2XA</sub>:

|    |              |              |              |
|----|--------------|--------------|--------------|
| Ni | 0.000000000  | 0.000000000  | 0.000000000  |
| N  | 0.000000000  | 0.000000000  | 2.203576989  |
| N  | 2.196784223  | 0.000000000  | 0.238954988  |
| N  | 0.145187059  | -0.640261337 | -2.096780656 |
| N  | -2.082031282 | -0.663527707 | -0.179071841 |
| C  | 1.367561236  | -0.516668030 | 2.552497845  |
| H  | 1.574965463  | -0.357759909 | 3.622246355  |
| H  | 1.366532919  | -1.598225896 | 2.381476120  |
| C  | 2.440794410  | 0.158557705  | 1.717563374  |
| H  | 3.431122928  | -0.242531083 | 1.980265696  |
| H  | 2.466264749  | 1.229281428  | 1.929437403  |
| C  | 2.717553939  | -1.337672376 | -0.224435938 |
| H  | 3.800713396  | -1.380307453 | -0.023887391 |
| H  | 2.245855242  | -2.106575992 | 0.399598645  |
| C  | 2.478366579  | -1.669554748 | -1.704180645 |
| H  | 2.990639594  | -2.622936888 | -1.892385552 |
| H  | 2.985425228  | -0.945932721 | -2.349905267 |
| C  | 1.022253861  | -1.866215639 | -2.149962985 |
| H  | 0.552638084  | -2.633834682 | -1.522665962 |
| H  | 1.021247433  | -2.250865578 | -3.182904078 |
| C  | -1.261272411 | -1.002255805 | -2.508685054 |
| H  | -1.742977315 | -0.093182192 | -2.876049112 |
| H  | -1.231820097 | -1.711137439 | -3.349730314 |
| C  | -2.051155041 | -1.598083526 | -1.357018841 |
| H  | -1.603254960 | -2.539611509 | -1.021108227 |
| H  | -3.075940493 | -1.825707523 | -1.688446813 |
| C  | -2.662217406 | -1.404455554 | 0.997622733  |
| H  | -2.202229393 | -2.399792040 | 1.021389824  |
| H  | -3.737879535 | -1.550436711 | 0.813323572  |
| C  | -2.450500085 | -0.728627119 | 2.352565902  |
| H  | -2.763332374 | 0.320236343  | 2.328279257  |
| H  | -3.118468632 | -1.218804803 | 3.072763618  |
| C  | -1.023803204 | -0.875260066 | 2.881594406  |
| H  | -0.703475803 | -1.915994721 | 2.752980614  |
| H  | -0.996758476 | -0.660683793 | 3.961338610  |
| C  | -0.165685304 | 1.412417883  | 2.688922845  |
| H  | -0.048015888 | 1.451383054  | 3.781597165  |
| H  | 0.563503064  | 2.066725933  | 2.216359643  |
| H  | -1.146151352 | 1.787108478  | 2.404434674  |
| C  | 2.904474949  | 1.134193575  | -0.444690016 |
| H  | 3.943148822  | 1.203984974  | -0.091912477 |
| H  | 2.367986084  | 2.059267612  | -0.234871263 |
| H  | 2.917986789  | 0.991636412  | -1.520429982 |
| C  | 0.619141432  | 0.418456595  | -3.050071562 |
| H  | 1.670539462  | 0.639403474  | -2.895693794 |
| H  | 0.050434032  | 1.330641318  | -2.877938514 |

|   |              |             |              |
|---|--------------|-------------|--------------|
| H | 0.481298212  | 0.085196837 | -4.087820267 |
| C | -2.947204645 | 0.527246132 | -0.487569152 |
| H | -2.569563005 | 1.061052026 | -1.355611201 |
| H | -2.927178713 | 1.225114326 | 0.346170042  |
| H | -3.978614408 | 0.202425316 | -0.682964494 |
| O | -0.019570344 | 1.929434974 | -0.474267538 |
| O | -0.971265275 | 2.726960309 | 0.100640943  |
| H | -6.858408302 | 4.530115148 | -1.246995126 |
| C | -6.032593901 | 4.055044702 | -1.765643097 |
| C | -4.782745486 | 4.683727597 | -1.810219097 |
| C | -6.219527422 | 2.820119759 | -2.401526624 |
| C | -3.700344806 | 4.092104286 | -2.477057573 |
| H | -4.641036263 | 5.644158575 | -1.323211061 |
| C | -5.158713707 | 2.218957314 | -3.086863004 |
| H | -7.190876847 | 2.337288738 | -2.382193908 |
| C | -3.921256970 | 2.862049550 | -3.111020775 |
| C | -2.313286434 | 4.705060569 | -2.521834814 |
| H | -5.280461869 | 1.282565821 | -3.619483652 |
| O | -2.868579339 | 2.218878164 | -3.810887045 |
| C | -1.582410061 | 4.298895676 | -3.787492173 |
| H | -2.376966959 | 5.796843596 | -2.453139572 |
| C | -1.879944931 | 3.062813367 | -4.377424768 |
| C | -0.600752082 | 5.092224093 | -4.398717260 |
| C | -1.237019784 | 2.610148443 | -5.529762259 |
| H | -0.361117976 | 6.059946862 | -3.967760438 |
| C | 0.066654457  | 4.654760615 | -5.548682531 |
| C | -0.250322341 | 3.411815576 | -6.113216367 |
| H | -1.531097531 | 1.660977271 | -5.963413160 |
| H | 0.820990856  | 5.284379451 | -6.008276405 |
| H | 0.252153238  | 3.077252161 | -7.014688391 |
| H | -1.739809261 | 4.367106465 | -1.642678632 |

<sup>2</sup>R<sub>CHD</sub>:

|    |              |              |              |
|----|--------------|--------------|--------------|
| Ni | 0.151220725  | -0.423060204 | 0.095800023  |
| O  | 0.576312065  | -1.182820069 | 1.900256781  |
| N  | 2.262394076  | -0.019553751 | -0.030208771 |
| C  | 1.331523523  | 2.210872168  | 0.731876723  |
| H  | 1.405638111  | 2.947721082  | 1.544407162  |
| H  | 1.510627100  | 2.754020260  | -0.200434932 |
| C  | 2.391458828  | 1.139866573  | 0.923080168  |
| H  | 3.389332288  | 1.596934433  | 0.831450264  |
| H  | 2.314698758  | 0.701679579  | 1.921685651  |
| C  | 2.486495129  | 0.316050746  | -1.478273238 |
| H  | 3.521276177  | 0.666041388  | -1.625355280 |
| H  | 1.824230255  | 1.150842850  | -1.736407065 |
| C  | 2.221146250  | -0.863239431 | -2.442545780 |
| H  | 2.919483246  | -1.682597401 | -2.245120721 |
| H  | 2.484602624  | -0.505140244 | -3.447013477 |
| C  | 0.780849038  | -1.408729510 | -2.552876973 |
| H  | 0.102137185  | -0.593415990 | -2.836311868 |
| H  | 0.754746551  | -2.147259207 | -3.369782559 |
| C  | 3.241715176  | -1.045970954 | 0.459879043  |
| H  | 4.226836812  | -0.582374250 | 0.609331343  |
| H  | 3.360696839  | -1.853922435 | -0.254960482 |
| H  | 2.876342769  | -1.452212332 | 1.402451473  |
| O  | 0.166932428  | -2.464590707 | 2.174245788  |
| N  | 0.208693427  | -2.034373272 | -1.301222134 |
| C  | -1.244714172 | -2.418189386 | -1.476770539 |
| H  | -1.319292575 | -3.465900359 | -1.794160073 |
| H  | -1.673658019 | -1.810407749 | -2.278070802 |
| C  | -1.996075154 | -2.201257924 | -0.161906434 |
| H  | -3.026072276 | -2.579755845 | -0.240079202 |
| H  | -1.490743913 | -2.719743073 | 0.657623619  |
| C  | 0.959289094  | -3.261109881 | -0.880594495 |
| H  | 0.864206997  | -4.044017466 | -1.646048625 |
| H  | 0.555826249  | -3.614881471 | 0.068658217  |
| H  | 2.011002846  | -3.042536543 | -0.733097454 |
| C  | -2.147613312 | 0.996644233  | 2.057162676  |
| H  | -2.824748661 | 1.690270852  | 1.544046154  |
| H  | -2.458674542 | 1.017284039  | 3.109154092  |
| C  | -0.706403478 | 1.547072198  | 2.039683059  |
| H  | -0.716838602 | 2.552375570  | 2.490425717  |
| H  | -0.063022727 | 0.908506205  | 2.648528538  |



|   |              |              |              |
|---|--------------|--------------|--------------|
| C | -2.394585542 | -0.452294279 | 1.590787863  |
| H | -3.464527124 | -0.680930249 | 1.715085562  |
| H | -1.834178126 | -1.143595996 | 2.218279849  |
| N | -1.995956079 | -0.730723474 | 0.158396403  |
| N | -0.068756055 | 1.652762081  | 0.664894736  |
| C | -0.852938713 | 2.570794521  | -0.224374148 |
| H | -0.804853489 | 3.602308660  | 0.152515124  |
| H | -0.435447930 | 2.548479151  | -1.234363982 |
| H | -1.893400937 | 2.274873877  | -0.273799016 |
| C | -2.923075142 | -0.031107289 | -0.793424993 |
| H | -3.249208259 | 0.919082585  | -0.378221182 |
| H | -2.441514121 | 0.160387994  | -1.754190376 |
| H | -3.820618313 | -0.640927840 | -0.963343239 |
| C | -0.509428804 | 0.160104916  | 5.816057950  |
| C | -1.243703520 | 1.263101256  | 6.028461180  |
| C | -2.608725344 | -1.165399461 | 5.424292261  |
| C | -3.345494915 | -0.063734612 | 5.636096992  |
| C | -1.104826819 | -1.206357440 | 5.567998646  |
| H | -0.833540367 | -1.882270548 | 6.397701254  |
| H | -0.644786893 | -1.667130463 | 4.679365715  |
| H | -3.098912614 | -2.100924969 | 5.160238396  |
| H | -4.429089958 | -0.108717987 | 5.542383155  |
| H | -0.751664646 | 2.213121006  | 6.229628444  |
| H | 0.577247550  | 0.218819087  | 5.845363160  |
| C | -2.755559714 | 1.266516323  | 6.047339300  |
| H | -3.113475959 | 1.533979588  | 7.056588574  |
| H | -3.143890914 | 2.072596755  | 5.401458454  |

<sup>4</sup>TS<sub>Ar</sub>:

|   |              |              |              |
|---|--------------|--------------|--------------|
| O | -0.241771634 | 0.040590142  | 0.388513628  |
| N | 0.342110291  | -0.149360929 | 3.181682255  |
| C | 2.772540003  | -0.060604559 | 2.468418564  |
| H | 3.549214018  | 0.638421180  | 2.124759448  |
| H | 3.179538393  | -0.573014489 | 3.345155307  |
| C | 1.526527474  | 0.719407844  | 2.853205593  |
| H | 1.760170133  | 1.380160517  | 3.703276180  |
| H | 1.197015797  | 1.344443367  | 2.018846878  |
| C | 0.496592749  | -1.013845988 | 4.398762369  |
| H | 0.612030417  | -0.384055530 | 5.296329979  |
| H | 1.423728130  | -1.588450847 | 4.286989621  |
| C | -0.681909928 | -1.988473516 | 4.627403836  |
| H | -1.604849244 | -1.431904227 | 4.819299008  |
| H | -0.469671444 | -2.514123915 | 5.568641526  |
| C | -0.935842125 | -3.090118826 | 3.575877938  |
| H | -0.028002369 | -3.696470465 | 3.457906383  |
| H | -1.720831201 | -3.759283376 | 3.963464896  |
| C | -0.822834080 | 0.787936479  | 3.290148042  |
| H | -0.560145304 | 1.647435547  | 3.922914065  |
| H | -1.684709967 | 0.299072916  | 3.733435774  |
| H | -1.067309206 | 1.112956691  | 2.278769618  |
| O | -1.473961519 | -0.292294481 | -0.408551289 |
| N | -1.324009708 | -2.618533466 | 2.193827711  |
| C | -1.415451566 | -3.769918907 | 1.217461377  |
| H | -2.449182188 | -4.135106489 | 1.166963767  |
| H | -0.803874070 | -4.595043153 | 1.593428269  |
| C | -0.938997243 | -3.325587797 | -0.167072965 |
| H | -1.101981126 | -4.129766240 | -0.901173536 |
| H | -1.480667729 | -2.434372262 | -0.494817250 |
| C | -2.631687116 | -1.885954412 | 2.174572754  |
| H | -3.458339906 | -2.580821099 | 2.379909884  |
| H | -2.755069240 | -1.415322288 | 1.197464322  |
| H | -2.644405106 | -1.102661792 | 2.924913238  |
| C | 2.402931914  | -1.568967668 | -1.123539861 |
| H | 3.160580677  | -2.361895230 | -1.100892598 |
| H | 2.601215082  | -1.024720640 | -2.057155121 |
| C | 2.654263616  | -0.553686382 | 0.011875564  |
| H | 3.674760118  | -0.151171899 | -0.098686804 |
| H | 1.930887693  | 0.259625757  | -0.078762876 |
| C | 0.987246634  | -2.164848598 | -1.276859138 |
| H | 0.974565416  | -2.808304073 | -2.171907117 |
| H | 0.257790002  | -1.365291332 | -1.409644595 |

|    |              |              |              |
|----|--------------|--------------|--------------|
| N  | 0.520452980  | -2.972316183 | -0.087613930 |
| N  | 2.513322905  | -1.108252992 | 1.416406608  |
| C  | 3.488550754  | -2.217894823 | 1.664670175  |
| H  | 4.519788832  | -1.835539722 | 1.652844068  |
| H  | 3.294043312  | -2.665265509 | 2.643021475  |
| H  | 3.404282932  | -2.990835157 | 0.910713353  |
| C  | 1.312121863  | -4.238266559 | 0.049769747  |
| H  | 2.346434610  | -4.078544377 | -0.243200130 |
| H  | 1.300836008  | -4.606969871 | 1.077404875  |
| H  | 0.900746359  | -5.016478831 | -0.608121128 |
| H  | -2.737008513 | 2.115501636  | 0.845400991  |
| C  | -3.114905487 | 1.683023270  | -0.075912336 |
| C  | -2.161588533 | 1.242712442  | -1.072559438 |
| C  | -4.475499750 | 1.515901535  | -0.266008331 |
| C  | -2.710008497 | 0.797764947  | -2.340163981 |
| H  | -1.189317571 | 1.728291351  | -1.082298745 |
| C  | -4.989182954 | 0.979763642  | -1.472083213 |
| H  | -5.170539885 | 1.816598092  | 0.513531848  |
| C  | -4.069095781 | 0.638416052  | -2.504179738 |
| H  | -2.023100930 | 0.543328551  | -3.140060936 |
| H  | -4.458152858 | 0.262787392  | -3.446719135 |
| C  | -6.477209524 | 0.837812854  | -1.694165127 |
| H  | -6.986469366 | 0.739371090  | -0.727079995 |
| H  | -6.680762837 | -0.085001855 | -2.254533471 |
| C  | -7.082670636 | 2.035636121  | -2.466770354 |
| H  | -8.160075212 | 1.895784982  | -2.603886687 |
| H  | -6.924636641 | 2.973601128  | -1.922952954 |
| H  | -6.623666522 | 2.137914065  | -3.456561825 |
| Ni | 0.348023432  | -1.486714610 | 1.510857738  |

<sup>2</sup>TS<sub>A</sub>:

|   |              |              |              |
|---|--------------|--------------|--------------|
| O | 0.000000000  | 0.000000000  | 0.000000000  |
| N | 0.000000000  | 0.000000000  | 2.819539530  |
| C | 2.527852036  | 0.000000000  | 2.628592576  |
| H | 3.379164646  | 0.661976657  | 2.412121752  |
| H | 2.728273049  | -0.458844632 | 3.601160092  |
| C | 1.252650607  | 0.823768371  | 2.694480894  |
| H | 1.325177204  | 1.536664988  | 3.531391027  |
| H | 1.122887055  | 1.397127206  | 1.772716753  |
| C | -0.133911164 | -0.783696628 | 4.092056667  |
| H | -0.185891542 | -0.098373340 | 4.954166771  |
| H | 0.774444250  | -1.385805016 | 4.213625151  |
| C | -1.369796388 | -1.712933876 | 4.125324414  |
| H | -2.290654661 | -1.123087065 | 4.079840489  |
| H | -1.381108862 | -2.175924518 | 5.121531533  |
| C | -1.439085772 | -2.880537476 | 3.117077793  |
| H | -0.554982705 | -3.519635399 | 3.240397157  |
| H | -2.317818616 | -3.496571363 | 3.367396793  |
| C | -1.132412403 | 0.962838166  | 2.617474548  |
| H | -0.968345385 | 1.869793332  | 3.216209840  |
| H | -2.079420996 | 0.530397884  | 2.925418733  |
| H | -1.166881154 | 1.200478806  | 1.553861194  |
| O | -0.992594997 | -0.377185993 | -1.056198729 |
| N | -1.497860020 | -2.501898542 | 1.656282226  |
| C | -1.421158097 | -3.718523647 | 0.762368883  |
| H | -2.432872531 | -4.066467393 | 0.516466190  |
| H | -0.931438057 | -4.526071710 | 1.314021631  |
| C | -0.647302149 | -3.384535455 | -0.514303863 |
| H | -0.675736675 | -4.236938187 | -1.210371840 |
| H | -1.076486592 | -2.510379595 | -1.010248930 |
| C | -2.737404301 | -1.737830666 | 1.301640699  |
| H | -3.619055470 | -2.390361580 | 1.376103821  |
| H | -2.631599359 | -1.345093674 | 0.288933150  |
| H | -2.872713239 | -0.894317538 | 1.969647390  |
| C | 2.868337585  | -1.743748911 | -0.858187618 |
| H | 3.583269776  | -2.543040129 | -0.627442520 |
| H | 3.269636330  | -1.267869860 | -1.763764599 |
| C | 2.906878114  | -0.655825341 | 0.236673271  |
| H | 3.938651542  | -0.275048526 | 0.314609118  |
| H | 2.239167761  | 0.158505505  | -0.053055914 |
| C | 1.499675409  | -2.331447019 | -1.263294294 |
| H | 1.655885410  | -3.033722810 | -2.098727068 |
| H | 0.831407631  | -1.536296377 | -1.595953883 |

|    |              |              |              |
|----|--------------|--------------|--------------|
| N  | 0.773352720  | -3.050056920 | -0.149640479 |
| N  | 2.463391063  | -1.112378857 | 1.613214729  |
| C  | 3.332536921  | -2.218105577 | 2.128354255  |
| H  | 4.354084639  | -1.853229680 | 2.311053473  |
| H  | 2.924252890  | -2.596946144 | 3.069254979  |
| H  | 3.385430005  | -3.037505595 | 1.421832447  |
| C  | 1.481006587  | -4.317065426 | 0.227871320  |
| H  | 2.558100847  | -4.192807190 | 0.151486183  |
| H  | 1.242050788  | -4.618486892 | 1.249617552  |
| H  | 1.194906714  | -5.129168237 | -0.454972897 |
| H  | -1.741178746 | 2.486439199  | -0.722182066 |
| C  | -2.084936571 | 1.897458722  | -1.565997957 |
| C  | -1.146231643 | 0.993811184  | -2.201508255 |
| C  | -3.400252692 | 1.964020497  | -1.983600172 |
| C  | -1.603713317 | 0.330606749  | -3.408953724 |
| H  | -0.092803390 | 1.252175710  | -2.145383835 |
| C  | -3.860182502 | 1.215735026  | -3.098099199 |
| H  | -4.099693792 | 2.614208476  | -1.465102530 |
| C  | -2.924078838 | 0.409115194  | -3.800949249 |
| H  | -0.896318770 | -0.267908706 | -3.972700218 |
| H  | -3.258695166 | -0.131621297 | -4.682642331 |
| C  | -5.288981503 | 1.330829440  | -3.576991087 |
| H  | -5.949102024 | 1.536039166  | -2.724911667 |
| H  | -5.612510587 | 0.373220406  | -4.006039642 |
| C  | -5.473959296 | 2.444309144  | -4.637899870 |
| H  | -6.518999295 | 2.494874258  | -4.961719560 |
| H  | -5.193323121 | 3.423078604  | -4.233267058 |
| H  | -4.851965844 | 2.253726973  | -5.519490555 |
| Ni | 0.331051412  | -1.460707469 | 1.282991424  |

<sup>4</sup>I<sub>A</sub>:

|   |              |              |              |
|---|--------------|--------------|--------------|
| O | -0.217706686 | -0.083042704 | 0.050078334  |
| N | -0.095046077 | -0.030043795 | 2.879300930  |
| C | 2.405695160  | 0.224483400  | 2.556377988  |
| H | 3.171422464  | 0.962618341  | 2.276765333  |
| H | 2.701406989  | -0.179166984 | 3.529019441  |
| C | 1.056669917  | 0.914649362  | 2.667496758  |
| H | 1.095439328  | 1.656365336  | 3.481207549  |
| H | 0.821668995  | 1.443127798  | 1.739550469  |
| C | -0.077267698 | -0.791298651 | 4.172199601  |
| H | -0.156346496 | -0.094082103 | 5.022466502  |
| H | 0.894922204  | -1.291551755 | 4.255252831  |
| C | -1.203356145 | -1.844426042 | 4.289666878  |
| H | -2.183340998 | -1.356835830 | 4.284716116  |
| H | -1.112346662 | -2.283525235 | 5.292656810  |
| C | -1.199310363 | -3.034397477 | 3.305843186  |
| H | -0.244037888 | -3.569774518 | 3.386989435  |
| H | -1.988516038 | -3.737801116 | 3.616230573  |
| C | -1.331252285 | 0.806223497  | 2.725085644  |
| H | -1.228287052 | 1.740354742  | 3.294817643  |
| H | -2.209352456 | 0.287550180  | 3.097760716  |
| H | -1.451945864 | 1.013063143  | 1.661684316  |
| O | -1.266572337 | -0.604544935 | -0.939608291 |
| N | -1.383655514 | -2.697970340 | 1.844423311  |
| C | -1.231017965 | -3.923052076 | 0.970435408  |
| H | -2.214828162 | -4.370347770 | 0.779758995  |
| H | -0.642221893 | -4.667842664 | 1.513095539  |
| C | -0.553153736 | -3.546573004 | -0.347718676 |
| H | -0.524386928 | -4.416257914 | -1.021946293 |
| H | -1.091206162 | -2.734422109 | -0.841520324 |
| C | -2.718826438 | -2.081374737 | 1.554285836  |
| H | -3.518871410 | -2.816423541 | 1.721427270  |
| H | -2.727793604 | -1.731176629 | 0.521380469  |
| H | -2.894480244 | -1.223576427 | 2.194446664  |
| C | 2.767306350  | -1.584184551 | -0.894030780 |
| H | 3.565333626  | -2.304112646 | -0.675845236 |
| H | 3.080965634  | -1.099311119 | -1.828754728 |
| C | 2.745832551  | -0.465794042 | 0.169412781  |
| H | 3.737900906  | 0.014341620  | 0.192024427  |
| H | 1.992276723  | 0.273121863  | -0.111668730 |
| C | 1.445396540  | -2.310891013 | -1.219975543 |

|    |              |              |              |
|----|--------------|--------------|--------------|
| H  | 1.629225270  | -3.018121006 | -2.045406851 |
| H  | 0.692220239  | -1.590184732 | -1.538097993 |
| N  | 0.841238830  | -3.061670167 | -0.056455203 |
| N  | 2.406378511  | -0.920983348 | 1.575711367  |
| C  | 3.401140122  | -1.920718162 | 2.080552861  |
| H  | 4.387917000  | -1.452439911 | 2.206463564  |
| H  | 3.072900698  | -2.307759496 | 3.048707834  |
| H  | 3.504747465  | -2.752668382 | 1.395149377  |
| C  | 1.687201832  | -4.240184767 | 0.324848444  |
| H  | 2.741594485  | -4.017259207 | 0.186845188  |
| H  | 1.530359326  | -4.523932710 | 1.367205277  |
| H  | 1.447274405  | -5.101317147 | -0.314079272 |
| H  | -2.029346231 | 2.118313370  | -0.491960410 |
| C  | -2.431885793 | 1.552437044  | -1.324902196 |
| C  | -1.543422353 | 0.519376842  | -1.933402726 |
| C  | -3.709391053 | 1.767802520  | -1.773631048 |
| C  | -2.139779109 | -0.157744176 | -3.124267267 |
| H  | -0.539879477 | 0.917120712  | -2.139715708 |
| C  | -4.254742946 | 1.053630096  | -2.882449592 |
| H  | -4.332226422 | 2.513673364  | -1.284850626 |
| C  | -3.422302875 | 0.096007191  | -3.536249983 |
| H  | -1.520410844 | -0.880851549 | -3.645358901 |
| H  | -3.821232456 | -0.433005904 | -4.398439435 |
| C  | -5.644900547 | 1.348868449  | -3.393246718 |
| H  | -6.281715655 | 1.680987505  | -2.563190555 |
| H  | -6.096153732 | 0.429787965  | -3.789976918 |
| C  | -5.659639490 | 2.432068125  | -4.502314436 |
| H  | -6.683675991 | 2.614763116  | -4.847657554 |
| H  | -5.249077996 | 3.378228681  | -4.132212527 |
| H  | -5.058849878 | 2.119691549  | -5.364290714 |
| Ni | 0.300592936  | -1.481893073 | 1.348150523  |

<sup>2</sup>I<sub>Ar</sub>:

|   |              |              |              |
|---|--------------|--------------|--------------|
| O | -0.208876144 | -0.390553363 | -0.942102747 |
| N | 1.292395287  | 2.033068091  | -0.816088814 |
| C | 2.924472496  | 0.814698044  | -2.324752976 |
| H | 3.064031025  | 0.492490420  | -3.366816218 |
| H | 3.809932924  | 1.398091859  | -2.056315661 |
| C | 1.678954347  | 1.680318985  | -2.226741830 |
| H | 1.824542936  | 2.595502686  | -2.822478375 |
| H | 0.813278301  | 1.147361155  | -2.629101405 |
| C | 2.271612482  | 2.894605379  | -0.074315873 |
| H | 2.359487961  | 3.876959584  | -0.566688525 |
| H | 3.255552222  | 2.414957342  | -0.135759004 |
| C | 1.907449064  | 3.117655756  | 1.411942735  |
| H | 0.968153792  | 3.672847067  | 1.495796512  |
| H | 2.671522291  | 3.793701277  | 1.819271667  |
| C | 1.882483082  | 1.892594128  | 2.351087600  |
| H | 2.859065973  | 1.391395055  | 2.322217184  |
| H | 1.738369418  | 2.254281693  | 3.381828746  |
| C | -0.062140779 | 2.669389583  | -0.921346397 |
| H | -0.068019884 | 3.408744495  | -1.734502916 |
| H | -0.329281378 | 3.185638199  | -0.004663234 |
| H | -0.784092066 | 1.877325976  | -1.118298207 |
| O | -1.350905326 | -0.789264162 | -0.004123757 |
| N | 0.845249803  | 0.837846865  | 2.043991274  |
| C | 0.994367769  | -0.367288904 | 2.947144254  |
| H | 0.323749796  | -0.270928897 | 3.810356203  |
| H | 2.015542271  | -0.387017971 | 3.338359817  |
| C | 0.683247544  | -1.648970764 | 2.172042609  |
| H | 0.693447563  | -2.515658939 | 2.850887725  |
| H | -0.298715913 | -1.582355970 | 1.696898498  |
| C | -0.555600440 | 1.353817550  | 2.182522708  |
| H | -0.767055750 | 1.591190025  | 3.234916090  |
| H | -1.246375198 | 0.597781200  | 1.809165889  |
| H | -0.698290710 | 2.249213642  | 1.588116269  |
| C | 2.177511190  | -2.861097543 | -1.212957294 |
| H | 3.183523357  | -3.220829761 | -0.964719224 |
| H | 1.757302885  | -3.641272318 | -1.862548445 |
| C | 2.260589498  | -1.591182064 | -2.085198662 |
| H | 2.848095850  | -1.825172748 | -2.988245452 |
| H | 1.249814612  | -1.297711234 | -2.378020514 |
| C | 1.280484239  | -2.825423382 | 0.041916067  |

|    |              |              |              |
|----|--------------|--------------|--------------|
| H  | 1.267551640  | -3.830463147 | 0.494053629  |
| H  | 0.264058967  | -2.551564749 | -0.241656772 |
| N  | 1.709332423  | -1.822014414 | 1.085520877  |
| N  | 2.884675582  | -0.384940069 | -1.410640222 |
| C  | 4.297223469  | -0.663584123 | -0.997206044 |
| H  | 4.934316829  | -0.818649650 | -1.879886844 |
| H  | 4.686985098  | 0.186323280  | -0.430918439 |
| H  | 4.356500771  | -1.547785831 | -0.374371197 |
| C  | 3.013383268  | -2.217623216 | 1.711792293  |
| H  | 3.655811150  | -2.707737768 | 0.984222628  |
| H  | 3.544864173  | -1.350491769 | 2.109036445  |
| H  | 2.841241710  | -2.930187102 | 2.530328906  |
| H  | -2.525252902 | 0.605786515  | -2.242543289 |
| C  | -3.129357345 | 0.120208942  | -1.484029779 |
| C  | -2.575315361 | -1.120301209 | -0.867422532 |
| C  | -4.329385973 | 0.654017992  | -1.091113068 |
| C  | -3.516709614 | -1.792188229 | 0.075888740  |
| H  | -2.171545511 | -1.806647390 | -1.623783490 |
| C  | -5.153788143 | 0.021253695  | -0.111211096 |
| H  | -4.680192900 | 1.578617804  | -1.544516916 |
| C  | -4.709810301 | -1.218400734 | 0.438261147  |
| H  | -3.205679619 | -2.743185773 | 0.497052546  |
| H  | -5.352873095 | -1.728500217 | 1.151423891  |
| C  | -6.487184807 | 0.614158904  | 0.279001190  |
| H  | -6.412973428 | 1.710253883  | 0.295987837  |
| H  | -6.747726512 | 0.299004586  | 1.297789968  |
| C  | -7.633320788 | 0.206251194  | -0.681535096 |
| H  | -8.580262100 | 0.658915123  | -0.364354555 |
| H  | -7.423609245 | 0.534805708  | -1.706089677 |
| H  | -7.762988993 | -0.882363158 | -0.696689563 |
| Ni | 1.392522232  | 0.103975993  | 0.107208251  |

<sup>4</sup>TS<sub>HA,EB</sub>:

|   |              |              |              |
|---|--------------|--------------|--------------|
| O | -0.153252391 | 0.145497861  | 0.253103237  |
| N | -0.088584726 | -0.137753956 | 3.076241025  |
| C | 2.437058642  | -0.062846495 | 2.858178562  |
| H | 3.270416206  | 0.636992209  | 2.697987518  |
| H | 2.662179922  | -0.610244588 | 3.778088323  |
| C | 1.146427150  | 0.721510743  | 3.024019902  |
| H | 1.215631740  | 1.341726897  | 3.932090013  |
| H | 0.994206173  | 1.389361739  | 2.171882237  |
| C | -0.179176921 | -1.061114733 | 4.256887868  |
| H | -0.227197856 | -0.474702805 | 5.189493892  |
| H | 0.743397633  | -1.652295402 | 4.294733710  |
| C | -1.394754081 | -2.015687804 | 4.209493968  |
| H | -2.328881858 | -1.445560966 | 4.229665423  |
| H | -1.385160210 | -2.575413956 | 5.154817344  |
| C | -1.446889364 | -3.078256898 | 3.090630722  |
| H | -0.543942467 | -3.700813898 | 3.138022399  |
| H | -2.305170804 | -3.741012418 | 3.286808930  |
| C | -1.241811231 | 0.818880573  | 3.021186156  |
| H | -1.096105384 | 1.627076619  | 3.752139137  |
| H | -2.180518174 | 0.326571419  | 3.254537984  |
| H | -1.294544676 | 1.223347463  | 2.011846254  |
| O | -0.995798947 | -0.109448114 | -0.921975305 |
| N | -1.538120675 | -2.555954515 | 1.676515637  |
| C | -1.443776840 | -3.672883868 | 0.661119787  |
| H | -2.450328643 | -4.018898152 | 0.392475015  |
| H | -0.927683456 | -4.520195599 | 1.120872029  |
| C | -0.695007216 | -3.186350194 | -0.581915278 |
| H | -0.712588397 | -3.960916389 | -1.364068296 |
| H | -1.150999805 | -2.274586928 | -0.976118933 |
| C | -2.803574296 | -1.800346374 | 1.417799393  |
| H | -3.672118935 | -2.467365145 | 1.513488290  |
| H | -2.763654442 | -1.382143031 | 0.412159486  |
| H | -2.916901422 | -0.975363609 | 2.111883254  |
| C | 2.785862418  | -1.449092921 | -0.784898714 |
| H | 3.524159016  | -2.245570019 | -0.630567191 |
| H | 3.170053434  | -0.877549620 | -1.641013114 |
| C | 2.797288996  | -0.470308955 | 0.409168551  |
| H | 3.817790301  | -0.066927591 | 0.517269465  |

|    |              |              |              |
|----|--------------|--------------|--------------|
| H  | 2.106120354  | 0.350664960  | 0.203978271  |
| C  | 1.434117382  | -2.035050895 | -1.245612483 |
| H  | 1.612223105  | -2.665904498 | -2.131900947 |
| H  | 0.756975563  | -1.229358702 | -1.530170334 |
| N  | 0.720339913  | -2.856580805 | -0.196173076 |
| N  | 2.381319159  | -1.070562459 | 1.739232745  |
| C  | 3.283080968  | -2.200022562 | 2.133304028  |
| H  | 4.299900425  | -1.831204075 | 2.331805848  |
| H  | 2.901203388  | -2.673543461 | 3.041274823  |
| H  | 3.339385268  | -2.948977292 | 1.353603212  |
| C  | 1.454429012  | -4.137845716 | 0.070344093  |
| H  | 2.526836505  | -3.993196347 | -0.033860239 |
| H  | 1.255156296  | -4.512272213 | 1.076545076  |
| H  | 1.155197883  | -4.905225933 | -0.657061729 |
| H  | -6.803314465 | 0.068418890  | 0.537727437  |
| C  | -5.949178208 | 0.732675340  | 0.625642407  |
| C  | -5.837912495 | 1.583892355  | 1.735460683  |
| C  | -4.978083924 | 0.746871729  | -0.377677164 |
| C  | -4.743771444 | 2.457416693  | 1.829848519  |
| H  | -6.601584584 | 1.579314613  | 2.506371475  |
| C  | -3.863290180 | 1.619219470  | -0.300211905 |
| H  | -5.090584980 | 0.093296792  | -1.235918092 |
| C  | -3.771294334 | 2.472687298  | 0.829760226  |
| H  | -4.663575532 | 3.137210428  | 2.672419486  |
| H  | -2.937778410 | 3.166806811  | 0.895308647  |
| C  | -2.807659626 | 1.648751250  | -1.318948056 |
| H  | -1.852337740 | 0.730289382  | -0.964695601 |
| H  | -2.169290389 | 2.536375941  | -1.247820161 |
| C  | -3.088124446 | 1.225750348  | -2.750830950 |
| H  | -2.160237028 | 1.198472949  | -3.329351662 |
| H  | -3.547144871 | 0.232919621  | -2.813647493 |
| H  | -3.769183168 | 1.935726574  | -3.241787994 |
| Ni | 0.236713867  | -1.425431803 | 1.391015661  |

<sup>4</sup>TS<sub>HA,XA</sub>:

|    |              |              |              |
|----|--------------|--------------|--------------|
| Ni | -0.293278124 | -1.431369739 | 0.893452765  |
| O  | -0.371264941 | -0.225461201 | -0.675990894 |
| N  | -0.086021935 | 0.235680255  | 2.241457261  |
| C  | 2.333001146  | -0.365802105 | 1.771948783  |
| H  | 3.256758855  | 0.048187890  | 1.342846136  |
| H  | 2.586243003  | -0.713255719 | 2.777670928  |
| C  | 1.280344391  | 0.728613672  | 1.846938070  |
| H  | 1.621297272  | 1.506051351  | 2.549361979  |
| H  | 1.141437331  | 1.190611631  | 0.866341355  |
| C  | -0.173684089 | -0.385352611 | 3.606407935  |
| H  | 0.045740906  | 0.370913257  | 4.378237808  |
| H  | 0.604299861  | -1.154060944 | 3.678973745  |
| C  | -1.547325483 | -1.024414642 | 3.917451573  |
| H  | -2.331875804 | -0.261337444 | 3.918791820  |
| H  | -1.494652900 | -1.377842457 | 4.956314572  |
| C  | -1.996033487 | -2.240738542 | 3.078026456  |
| H  | -1.232707426 | -3.028032217 | 3.136730579  |
| H  | -2.914347269 | -2.648823134 | 3.530509572  |
| C  | -0.992735396 | 1.425321085  | 2.115029221  |
| H  | -0.549112250 | 2.288431080  | 2.632210725  |
| H  | -1.960639337 | 1.229788368  | 2.567700071  |
| H  | -1.139637117 | 1.647337407  | 1.057962465  |
| O  | -1.605903548 | 0.537362619  | -0.754090371 |
| N  | -2.241330509 | -1.978441339 | 1.609897013  |
| C  | -2.566970032 | -3.247763620 | 0.853688131  |
| H  | -3.652896526 | -3.340985136 | 0.730564468  |
| H  | -2.239140755 | -4.107317330 | 1.444228677  |
| C  | -1.879020770 | -3.229239363 | -0.512916119 |
| H  | -2.204995004 | -4.084551442 | -1.123534430 |
| H  | -2.134915212 | -2.314128582 | -1.050689790 |
| C  | -3.361147271 | -1.010152386 | 1.388555034  |
| H  | -4.297393395 | -1.416128494 | 1.799000410  |
| H  | -3.468797635 | -0.825949841 | 0.320950602  |
| H  | -3.148950952 | -0.055827333 | 1.856281667  |
| C  | 1.866273637  | -2.643040923 | -1.371103798 |
| H  | 2.390119701  | -3.551726139 | -1.050181272 |
| H  | 2.269642071  | -2.425210098 | -2.369341211 |
| C  | 2.270531102  | -1.447190489 | -0.484258651 |

|   |              |              |              |
|---|--------------|--------------|--------------|
| H | 3.364820286  | -1.325195981 | -0.543042117 |
| H | 1.794162247  | -0.537974845 | -0.860660746 |
| C | 0.362717526  | -2.909756744 | -1.578299760 |
| H | 0.239924907  | -3.728506366 | -2.303925719 |
| H | -0.101349626 | -2.010590058 | -1.982582554 |
| N | -0.390488013 | -3.250412426 | -0.313993553 |
| N | 1.885562272  | -1.567446352 | 0.977141443  |
| C | 2.513169758  | -2.772304399 | 1.606914069  |
| H | 3.608810420  | -2.677143835 | 1.618941155  |
| H | 2.161378259  | -2.872064615 | 2.637000332  |
| H | 2.254104053  | -3.675814751 | 1.067840250  |
| C | 0.009853942  | -4.601465596 | 0.198099166  |
| H | 1.064278396  | -4.784413895 | 0.004902632  |
| H | -0.160744476 | -4.689309685 | 1.272775547  |
| H | -0.559940825 | -5.388488057 | -0.315603939 |
| H | -0.382787761 | 1.063969190  | -4.232735006 |
| C | -0.641118091 | 0.034081947  | -4.457789674 |
| C | 0.197289160  | -0.742312089 | -5.256687048 |
| C | -1.839010207 | -0.495160724 | -3.929649285 |
| C | -0.142658004 | -2.075092918 | -5.551342964 |
| H | 1.107100410  | -0.313546205 | -5.662508025 |
| C | -2.147240393 | -1.836890710 | -4.242879133 |
| C | -1.322496746 | -2.625893212 | -5.045247301 |
| H | 0.501130179  | -2.674354533 | -6.186093430 |
| C | -4.076578556 | -0.301361990 | -2.845450787 |
| H | -1.624922375 | -3.641248343 | -5.273036676 |
| C | -4.318550473 | -1.651079778 | -3.177636118 |
| C | -5.146411803 | 0.427398561  | -2.282277337 |
| C | -5.553299705 | -2.264546421 | -2.964796239 |
| H | -4.990665790 | 1.471971676  | -2.029686559 |
| C | -6.386867118 | -0.170186876 | -2.061277293 |
| C | -6.590730033 | -1.519565359 | -2.399679346 |
| H | -5.685742732 | -3.298579793 | -3.260446907 |
| H | -7.198970812 | 0.410349365  | -1.637420523 |
| H | -7.558356760 | -1.981726442 | -2.237786741 |
| C | -2.737475603 | 0.273237462  | -3.054641263 |
| H | -2.726125367 | 1.353990961  | -3.225802807 |
| H | -2.128479500 | 0.325524570  | -1.857975475 |
| O | -3.314365374 | -2.444561857 | -3.755940369 |

<sup>4</sup>TS<sub>2HA,XA</sub>:

|    |              |              |              |
|----|--------------|--------------|--------------|
| Ni | 0.000000000  | 0.000000000  | 0.000000000  |
| N  | 0.000000000  | 0.000000000  | 2.228560696  |
| N  | 2.213569130  | 0.000000000  | 0.256776777  |
| N  | 0.183540629  | -0.710340307 | -2.067937251 |
| N  | -2.057037043 | -0.736896970 | -0.163616647 |
| C  | 1.375210296  | -0.494262333 | 2.571629087  |
| H  | 1.585529658  | -0.327989092 | 3.640299930  |
| H  | 1.391533847  | -1.576482722 | 2.404853331  |
| C  | 2.435698930  | 0.195344329  | 1.732185361  |
| H  | 3.435329670  | -0.170141295 | 2.013327619  |
| H  | 2.424111888  | 1.270272563  | 1.921495206  |
| C  | 2.756408301  | -1.338324494 | -0.169946054 |
| H  | 3.840570922  | -1.361183577 | 0.031291830  |
| H  | 2.296362840  | -2.099149541 | 0.472091950  |
| C  | 2.522829746  | -1.713097074 | -1.640220792 |
| H  | 3.040949379  | -2.668369576 | -1.802030988 |
| H  | 3.026559313  | -1.004120910 | -2.304691710 |
| C  | 1.068712982  | -1.931079721 | -2.082608428 |
| H  | 0.602945196  | -2.681709296 | -1.432388923 |
| H  | 1.072052643  | -2.347536557 | -3.103627571 |
| C  | -1.213715391 | -1.090895131 | -2.483579002 |
| H  | -1.697358082 | -0.188291251 | -2.862417105 |
| H  | -1.175007295 | -1.807076944 | -3.318600846 |
| C  | -2.013831516 | -1.678959804 | -1.333747465 |
| H  | -1.565263218 | -2.616482545 | -0.988476201 |
| H  | -3.034510158 | -1.913976591 | -1.674185945 |
| C  | -2.608027254 | -1.480966213 | 1.024101908  |
| H  | -2.106070798 | -2.455268917 | 1.064382705  |
| H  | -3.676512015 | -1.675619389 | 0.839555698  |
| C  | -2.431122899 | -0.776394341 | 2.370010085  |

|   |              |              |              |
|---|--------------|--------------|--------------|
| H | -2.767663249 | 0.264327072  | 2.321372965  |
| H | -3.097544393 | -1.269963332 | 3.089514991  |
| C | -1.008535739 | -0.877584229 | 2.920787441  |
| H | -0.666044093 | -1.914931480 | 2.824519301  |
| H | -1.000823362 | -0.634898920 | 3.995255375  |
| C | -0.175152135 | 1.416163237  | 2.696434965  |
| H | 0.016406840  | 1.481038613  | 3.778147572  |
| H | 0.489380161  | 2.081958207  | 2.151999565  |
| H | -1.185406157 | 1.753216075  | 2.476764601  |
| C | 2.903921900  | 1.133222525  | -0.444146332 |
| H | 3.926075673  | 1.257720546  | -0.058894946 |
| H | 2.314270452  | 2.036914310  | -0.286922573 |
| H | 2.964711054  | 0.948790679  | -1.512589664 |
| C | 0.660299266  | 0.334391882  | -3.033621704 |
| H | 1.717713805  | 0.535340715  | -2.894719554 |
| H | 0.114066678  | 1.258025995  | -2.847593073 |
| H | 0.502691685  | -0.000314274 | -4.068517311 |
| C | -2.943182734 | 0.435521244  | -0.470421374 |
| H | -2.622245855 | 0.917466813  | -1.390760739 |
| H | -2.860681778 | 1.181171099  | 0.316727721  |
| H | -3.985860980 | 0.104759876  | -0.581404536 |
| O | 0.010237410  | 1.926574838  | -0.415346684 |
| O | -1.005953989 | 2.758473244  | 0.194617094  |
| H | -6.465649825 | 4.564622377  | 0.207309975  |
| C | -5.818612768 | 4.154938363  | -0.560593757 |
| C | -4.460393870 | 4.472398876  | -0.567235287 |
| C | -6.352895356 | 3.314499092  | -1.552833357 |
| C | -3.599065550 | 3.961143798  | -1.561129866 |
| H | -4.048712122 | 5.126812480  | 0.195305307  |
| C | -5.526105674 | 2.799432580  | -2.554719305 |
| H | -7.410730386 | 3.075130362  | -1.552918745 |
| C | -4.170870603 | 3.127003671  | -2.544860605 |
| C | -2.151574414 | 4.226611684  | -1.588903975 |
| H | -5.911384724 | 2.168761887  | -3.347289644 |
| O | -3.380470463 | 2.583469108  | -3.574921064 |
| C | -1.477809918 | 3.954688916  | -2.866962128 |
| H | -1.846369461 | 5.155652754  | -1.099018547 |
| C | -2.110768445 | 3.131159617  | -3.823483568 |
| C | -0.200519338 | 4.460858439  | -3.191524214 |
| C | -1.524344272 | 2.825009239  | -5.051552531 |
| H | 0.304992087  | 5.099393257  | -2.473931067 |
| C | 0.403014914  | 4.159572443  | -4.412023691 |
| C | -0.258731179 | 3.340975038  | -5.344655199 |
| H | -2.071830334 | 2.213406200  | -5.759330246 |
| H | 1.378671048  | 4.570393695  | -4.648482340 |
| H | 0.201975949  | 3.122879608  | -6.302097648 |
| H | -1.567876852 | 3.396026591  | -0.702110522 |

<sup>4</sup>T<sub>SH<sub>A</sub>,CHD</sub>:

|    |             |              |              |
|----|-------------|--------------|--------------|
| Ni | 0.084360026 | -0.172796588 | -0.116505814 |
| O  | 0.163331416 | -0.437744617 | 1.847951186  |
| N  | 2.211268332 | 0.107084898  | -0.080723027 |
| C  | 1.360638624 | 2.484952730  | 0.108023492  |
| H  | 1.383820145 | 3.362593123  | 0.769923574  |
| H  | 1.701772323 | 2.825634712  | -0.873715812 |
| C  | 2.300781934 | 1.419675983  | 0.648835043  |
| H  | 3.333918808 | 1.801326363  | 0.622523432  |
| H  | 2.050199790 | 1.182257043  | 1.685948791  |
| C  | 2.637057765 | 0.145790746  | -1.519550180 |
| H  | 3.708729961 | 0.395569531  | -1.588859130 |
| H  | 2.086048127 | 0.956211899  | -2.010603154 |
| C  | 2.388760145 | -1.173394225 | -2.287312834 |
| H  | 3.002570072 | -1.977947602 | -1.870282609 |
| H  | 2.780360165 | -1.017212405 | -3.301759546 |
| C  | 0.932639975 | -1.657232625 | -2.464031564 |
| H  | 0.339494260 | -0.867509092 | -2.944228128 |
| H  | 0.939013754 | -2.517893541 | -3.152332326 |
| C  | 3.026759852 | -0.858498223 | 0.727141096  |
| H  | 4.004987897 | -0.416997394 | 0.965081558  |
| H  | 3.204291356 | -1.778488774 | 0.178650971  |
| H  | 2.482047358 | -1.085004507 | 1.643456956  |
| O  | 0.103103854 | -1.845699488 | 2.217040117  |
| N  | 0.206404040 | -2.040190286 | -1.195548013 |



|   |              |              |              |
|---|--------------|--------------|--------------|
| C | -1.241535552 | -2.390816770 | -1.451456711 |
| H | -1.352488574 | -3.478239333 | -1.547037515 |
| H | -1.548090334 | -1.956328523 | -2.406691898 |
| C | -2.112159742 | -1.866534169 | -0.306697768 |
| H | -3.146681145 | -2.227282547 | -0.412839657 |
| H | -1.717747764 | -2.209788629 | 0.653349412  |
| C | 0.845469531  | -3.207021613 | -0.506893812 |
| H | 0.759977994  | -4.107807456 | -1.131792125 |
| H | 0.356499841  | -3.356042123 | 0.455102886  |
| H | 1.894627832  | -3.016612449 | -0.310932777 |
| C | -2.345334471 | 1.747687229  | 1.120071364  |
| H | -2.895046248 | 2.326836519  | 0.368245776  |
| H | -2.801363097 | 2.029816323  | 2.078956328  |
| C | -0.879660611 | 2.224698983  | 1.199097507  |
| H | -0.878375301 | 3.305325923  | 1.418297468  |
| H | -0.373171770 | 1.700099686  | 2.012515116  |
| C | -2.613831670 | 0.237082798  | 0.959238503  |
| H | -3.701330993 | 0.064853566  | 1.002489544  |
| H | -2.143695476 | -0.294238881 | 1.784614295  |
| N | -2.072324608 | -0.363836849 | -0.314271351 |
| N | -0.057627999 | 1.994321768  | -0.053243149 |
| C | -0.642085283 | 2.717994731  | -1.227026105 |
| H | -0.587625921 | 3.805955811  | -1.076723582 |
| H | -0.082001346 | 2.462364889  | -2.130142365 |
| H | -1.679866525 | 2.445574604  | -1.378220574 |
| C | -2.836073878 | 0.135121217  | -1.504368284 |
| H | -3.137574843 | 1.169349053  | -1.357653276 |
| H | -2.238269672 | 0.079840141  | -2.415739212 |
| H | -3.750487880 | -0.458100948 | -1.645124631 |
| C | -1.896773518 | -0.921344208 | 4.713505189  |
| C | -3.148383267 | -0.401427769 | 4.694610963  |
| C | -2.730647340 | -3.024673035 | 3.671838807  |
| C | -3.989907690 | -2.529403704 | 3.641736504  |
| C | -1.582296216 | -2.234935138 | 4.137962961  |
| H | -0.812764877 | -2.803934744 | 4.672581135  |
| H | -0.786250731 | -1.984307880 | 3.099026690  |
| H | -2.544199009 | -4.046085797 | 3.348671588  |
| H | -4.813240875 | -3.147710290 | 3.292362391  |
| H | -3.341566567 | 0.573478986  | 5.136058905  |
| H | -1.082549445 | -0.359846490 | 5.163431440  |
| C | -4.332825081 | -1.147518460 | 4.135596628  |
| H | -5.124473435 | -1.214383617 | 4.903384930  |
| H | -4.807469832 | -0.560482787 | 3.326659315  |

<sup>2</sup>T<sub>S<sub>HA,EB</sub></sub>:

|   |              |              |              |
|---|--------------|--------------|--------------|
| O | -1.809919745 | -0.578766967 | 1.002139547  |
| N | -1.409590643 | -1.399155582 | 3.658733369  |
| C | 0.393305093  | 0.377716034  | 3.756276000  |
| H | 0.534360930  | 1.464681282  | 3.846580312  |
| H | 0.979630258  | -0.081117593 | 4.557747852  |
| C | -1.078604486 | 0.042987515  | 3.930027503  |
| H | -1.396759636 | 0.322718156  | 4.947107823  |
| H | -1.684204828 | 0.610351486  | 3.218218371  |
| C | -0.802044435 | -2.389704710 | 4.608476419  |
| H | -1.191886136 | -2.224114937 | 5.626423111  |
| H | 0.278114118  | -2.204455935 | 4.643258675  |
| C | -1.053259283 | -3.864949324 | 4.218201409  |
| H | -2.123591840 | -4.091135622 | 4.252563227  |
| H | -0.610681701 | -4.475102569 | 5.017372557  |
| C | -0.444211548 | -4.388810025 | 2.899442520  |
| H | 0.642609993  | -4.233001442 | 2.912719957  |
| H | -0.612116660 | -5.476887959 | 2.853156821  |
| C | -2.908609672 | -1.468851503 | 3.644204773  |
| H | -3.318352640 | -0.942068479 | 4.517550705  |
| H | -3.257345883 | -2.496258932 | 3.684996338  |
| H | -3.247359297 | -1.003851837 | 2.718158290  |
| O | -2.515544445 | -1.215503412 | -0.127886217 |
| N | -0.957903674 | -3.752852684 | 1.629104915  |
| C | -0.206520893 | -4.243852726 | 0.411922264  |
| H | -0.737551032 | -5.092424412 | -0.038239375 |
| H | 0.772351267  | -4.613203076 | 0.730383567  |

|    |              |              |              |
|----|--------------|--------------|--------------|
| C  | -0.058588302 | -3.107698962 | -0.602325790 |
| H  | 0.389678581  | -3.483997639 | -1.534637904 |
| H  | -1.031884802 | -2.663999731 | -0.828971111 |
| C  | -2.416942145 | -4.008801430 | 1.405790883  |
| H  | -2.589916807 | -5.079811664 | 1.225495907  |
| H  | -2.753221891 | -3.418554853 | 0.552187797  |
| H  | -3.000116399 | -3.701450626 | 2.267084611  |
| C  | 1.346398726  | 0.480945159  | -0.038050746 |
| H  | 2.435886112  | 0.360795147  | 0.006516842  |
| H  | 1.182655031  | 1.341785703  | -0.699599510 |
| C  | 0.794882411  | 0.909429000  | 1.337926418  |
| H  | 1.306848770  | 1.836406951  | 1.644568464  |
| H  | -0.274236242 | 1.109663273  | 1.243960693  |
| C  | 0.689554544  | -0.720566020 | -0.748459969 |
| H  | 1.152164946  | -0.835427264 | -1.742391262 |
| H  | -0.374654244 | -0.531489913 | -0.882054753 |
| N  | 0.801285247  | -2.029512193 | -0.001886653 |
| N  | 0.960352352  | -0.111698634 | 2.447401425  |
| C  | 2.405245711  | -0.421580566 | 2.691435575  |
| H  | 2.925896230  | 0.460350393  | 3.092048817  |
| H  | 2.488722715  | -1.235080876 | 3.417018203  |
| H  | 2.901517384  | -0.723266617 | 1.777122261  |
| C  | 2.220990770  | -2.510636809 | 0.033181997  |
| H  | 2.907899707  | -1.672701357 | 0.117958816  |
| H  | 2.394187793  | -3.182327700 | 0.876168129  |
| H  | 2.463945281  | -3.042758567 | -0.896962705 |
| H  | -1.632848735 | 4.486366993  | 0.491454565  |
| C  | -1.602058563 | 3.776681928  | -0.329601521 |
| C  | -0.647465912 | 3.927216022  | -1.346088595 |
| C  | -2.527592126 | 2.731592700  | -0.376600042 |
| C  | -0.624961712 | 3.017596177  | -2.415364710 |
| H  | 0.058476030  | 4.750419957  | -1.314596951 |
| C  | -2.527379031 | 1.807789026  | -1.451423626 |
| H  | -3.266930034 | 2.637242388  | 0.410429698  |
| C  | -1.546709566 | 1.971399935  | -2.463714899 |
| H  | 0.096977162  | 3.139947513  | -3.216888752 |
| H  | -1.539275685 | 1.282170728  | -3.304205014 |
| C  | -3.480939734 | 0.695192681  | -1.534212128 |
| H  | -2.914735247 | -0.307525547 | -0.808943894 |
| H  | -3.502926040 | 0.222413064  | -2.521246168 |
| C  | -4.846826962 | 0.796943685  | -0.877781153 |
| H  | -5.398644962 | -0.141016461 | -0.990007055 |
| H  | -4.774334896 | 1.012327819  | 0.194155970  |
| H  | -5.444199825 | 1.595933820  | -1.339625999 |
| Ni | -0.384824007 | -1.695778747 | 1.793241278  |

<sup>2</sup>TS<sub>HA,XA</sub>:

|    |              |              |              |
|----|--------------|--------------|--------------|
| Ni | -0.508177905 | -1.460025695 | 1.077102959  |
| O  | -0.836615461 | -0.274066398 | -0.469007428 |
| N  | 0.271670890  | 0.234876488  | 2.122878983  |
| C  | 2.362004082  | -0.776050085 | 1.113538095  |
| H  | 3.189393893  | -0.548245535 | 0.426115076  |
| H  | 2.817554090  | -1.103132427 | 2.052771404  |
| C  | 1.533565978  | 0.478405389  | 1.340586976  |
| H  | 2.153492592  | 1.237957106  | 1.843119038  |
| H  | 1.195043158  | 0.887242028  | 0.385199935  |
| C  | 0.474519601  | -0.218321056 | 3.539521902  |
| H  | 0.975227445  | 0.573964907  | 4.120283276  |
| H  | 1.151557600  | -1.080303088 | 3.521909433  |
| C  | -0.829883675 | -0.614072742 | 4.270285624  |
| H  | -1.481789658 | 0.257715508  | 4.385028653  |
| H  | -0.538300727 | -0.884676721 | 5.294428185  |
| C  | -1.641195226 | -1.811271309 | 3.727752066  |
| H  | -0.996761224 | -2.699148998 | 3.676945341  |
| H  | -2.442620170 | -2.037223475 | 4.449933707  |
| C  | -0.508485272 | 1.513443854  | 2.038933467  |
| H  | 0.146806898  | 2.368308441  | 2.257408768  |
| H  | -1.318913056 | 1.526735056  | 2.761277240  |
| H  | -0.918987340 | 1.598238652  | 1.032772359  |
| O  | -2.243210367 | 0.121297423  | -0.549815801 |
| N  | -2.244425272 | -1.628158418 | 2.355023004  |
| C  | -2.924473422 | -2.883437630 | 1.856421979  |
| H  | -4.000894195 | -2.832801187 | 2.063376477  |

|   |              |              |              |
|---|--------------|--------------|--------------|
| H | -2.535133052 | -3.741308081 | 2.411518950  |
| C | -2.678098615 | -3.043666131 | 0.353882057  |
| H | -3.278294756 | -3.873582201 | -0.049447650 |
| H | -2.950392495 | -2.123602742 | -0.171264142 |
| C | -3.251810810 | -0.520497295 | 2.322231837  |
| H | -4.112178560 | -0.773768288 | 2.958672335  |
| H | -3.567641163 | -0.366592301 | 1.291029523  |
| H | -2.820291388 | 0.410265184  | 2.672087453  |
| C | 0.704659804  | -3.095000938 | -1.567331244 |
| H | 1.158926085  | -4.065124512 | -1.331134612 |
| H | 0.827593375  | -2.982096754 | -2.652792425 |
| C | 1.523394186  | -1.949453093 | -0.935749458 |
| H | 2.563363193  | -2.027651483 | -1.293721185 |
| H | 1.111635462  | -0.991328805 | -1.260663608 |
| C | -0.817286480 | -3.121069573 | -1.321237859 |
| H | -1.262830821 | -3.931926781 | -1.917768917 |
| H | -1.240596897 | -2.173087208 | -1.646778682 |
| N | -1.212861103 | -3.290656322 | 0.125769591  |
| N | 1.547362740  | -1.929135147 | 0.580363406  |
| C | 2.148617469  | -3.185426615 | 1.130636107  |
| H | 3.210010875  | -3.259395635 | 0.854065327  |
| H | 2.072306442  | -3.181217840 | 2.220846123  |
| H | 1.635776937  | -4.061892683 | 0.753871299  |
| C | -0.870940161 | -4.665992921 | 0.614742719  |
| H | 0.052569075  | -5.014666465 | 0.158991671  |
| H | -0.745546312 | -4.686158953 | 1.698862169  |
| H | -1.662882088 | -5.375789825 | 0.337888861  |
| H | -0.854403599 | 1.967594708  | -3.436500881 |
| C | -0.681051562 | 1.006874288  | -3.910394418 |
| C | 0.498844670  | 0.773569834  | -4.614644152 |
| C | -1.673050744 | 0.008999213  | -3.800467052 |
| C | 0.718927716  | -0.471556416 | -5.230414652 |
| H | 1.243893603  | 1.557155787  | -4.697260716 |
| C | -1.419681622 | -1.228775283 | -4.429319961 |
| C | -0.245177640 | -1.478116776 | -5.141366252 |
| H | 1.630256230  | -0.648698035 | -5.791161454 |
| C | -3.969916260 | -0.808738376 | -3.264320146 |
| H | -0.119178775 | -2.437763938 | -5.628536147 |
| C | -3.647802527 | -2.026644207 | -3.898425380 |
| C | -5.302607164 | -0.636121368 | -2.832699999 |
| C | -4.589077788 | -3.037926976 | -4.097304544 |
| H | -5.578786898 | 0.297798046  | -2.352037711 |
| C | -6.256112414 | -1.636104865 | -3.021814346 |
| C | -5.898081903 | -2.841361045 | -3.652120528 |
| H | -4.287324488 | -3.945610230 | -4.606666840 |
| H | -7.277129805 | -1.480685344 | -2.690598027 |
| H | -6.640726965 | -3.616590345 | -3.807537002 |
| C | -2.917401304 | 0.198265315  | -3.036313576 |
| H | -3.275874204 | 1.231457003  | -3.000789832 |
| H | -2.559643879 | 0.104560497  | -1.774190895 |
| O | -2.351611439 | -2.274301378 | -4.376140052 |

<sup>2</sup>TS<sub>2HA.XA</sub>:

|    |              |              |              |
|----|--------------|--------------|--------------|
| Ni | 0.000000000  | 0.000000000  | 0.000000000  |
| N  | 0.000000000  | 0.000000000  | 2.221455457  |
| N  | 2.207759879  | 0.000000000  | 0.248324654  |
| N  | 0.181500503  | -0.723513942 | -2.073656391 |
| N  | -2.061935110 | -0.736555546 | -0.167591209 |
| C  | 1.374825765  | -0.497525379 | 2.562930759  |
| H  | 1.585135337  | -0.335350874 | 3.632028756  |
| H  | 1.390361165  | -1.579111272 | 2.392005207  |
| C  | 2.433212601  | 0.195466167  | 1.723620036  |
| H  | 3.434202857  | -0.167810503 | 2.002330259  |
| H  | 2.419191621  | 1.270238190  | 1.913753329  |
| C  | 2.757064068  | -1.336029261 | -0.178653198 |
| H  | 3.841455286  | -1.352231308 | 0.021165719  |
| H  | 2.302454598  | -2.098436601 | 0.465414324  |
| C  | 2.523608959  | -1.715219706 | -1.647688000 |
| H  | 3.046565801  | -2.668076641 | -1.807606348 |
| H  | 3.022894668  | -1.005294194 | -2.314347076 |
| C  | 1.070230876  | -1.940847900 | -2.088315532 |

|   |              |              |              |
|---|--------------|--------------|--------------|
| H | 0.608109510  | -2.692679668 | -1.436812332 |
| H | 1.074602408  | -2.358981340 | -3.108694518 |
| C | -1.215857733 | -1.107318156 | -2.484476018 |
| H | -1.700243857 | -0.207350589 | -2.867911120 |
| H | -1.178418280 | -1.828993375 | -3.314767083 |
| C | -2.015138224 | -1.687300429 | -1.330196894 |
| H | -1.564597376 | -2.620902691 | -0.976984770 |
| H | -3.034965710 | -1.927509173 | -1.669515240 |
| C | -2.629471746 | -1.467720060 | 1.020000553  |
| H | -2.148948424 | -2.452739868 | 1.061481195  |
| H | -3.701905330 | -1.639874768 | 0.836225605  |
| C | -2.436224168 | -0.766087008 | 2.364794459  |
| H | -2.762509813 | 0.277946631  | 2.318591635  |
| H | -3.103032713 | -1.253376077 | 3.088201332  |
| C | -1.010907836 | -0.881882321 | 2.906514171  |
| H | -0.673685316 | -1.919551475 | 2.795761758  |
| H | -0.996238834 | -0.652407993 | 3.983723802  |
| C | -0.174333737 | 1.412118875  | 2.702865911  |
| H | 0.019050517  | 1.465862685  | 3.784851107  |
| H | 0.488701953  | 2.084430300  | 2.164576574  |
| H | -1.184954280 | 1.750483243  | 2.487927593  |
| C | 2.887164677  | 1.138632291  | -0.455693723 |
| H | 3.902202061  | 1.284142635  | -0.059730640 |
| H | 2.277493168  | 2.032136915  | -0.316137343 |
| H | 2.964286830  | 0.943529910  | -1.521308555 |
| C | 0.652054100  | 0.322491189  | -3.040730440 |
| H | 1.708830881  | 0.528097984  | -2.904412155 |
| H | 0.101854804  | 1.243011977  | -2.851149665 |
| H | 0.493764036  | -0.013479809 | -4.075265601 |
| C | -2.933681962 | 0.442895223  | -0.489426095 |
| H | -2.584956417 | 0.931241924  | -1.396080267 |
| H | -2.864763819 | 1.182888971  | 0.304212342  |
| H | -3.975244128 | 0.118450031  | -0.626725438 |
| O | -0.029549748 | 1.901631713  | -0.483276493 |
| O | -0.986224805 | 2.736720022  | 0.224141069  |
| H | -6.434096067 | 4.601641155  | 0.262128727  |
| C | -5.775013311 | 4.215267354  | -0.507527485 |
| C | -4.417606607 | 4.535149927  | -0.485764577 |
| C | -6.292463938 | 3.401967800  | -1.530550197 |
| C | -3.541226985 | 4.053987490  | -1.480686874 |
| H | -4.018486429 | 5.167993495  | 0.301139469  |
| C | -5.450180145 | 2.917062798  | -2.534036719 |
| H | -7.349485649 | 3.160320619  | -1.552682870 |
| C | -4.095738681 | 3.246988515  | -2.495494708 |
| C | -2.091318088 | 4.320704947  | -1.476521984 |
| H | -5.822180198 | 2.308053914  | -3.349450806 |
| O | -3.291128136 | 2.735478398  | -3.529764429 |
| C | -1.399123657 | 4.083718185  | -2.753768647 |
| H | -1.798696320 | 5.241588122  | -0.964195817 |
| C | -2.016411756 | 3.285865228  | -3.740595646 |
| C | -0.116883267 | 4.596605929  | -3.043000320 |
| C | -1.408722436 | 3.009342997  | -4.965378037 |
| H | 0.376678235  | 5.215473288  | -2.300390506 |
| C | 0.507530759  | 4.326009392  | -4.260033605 |
| C | -0.138245642 | 3.531007302  | -5.223380589 |
| H | -1.943833253 | 2.415784852  | -5.697342829 |
| H | 1.487451960  | 4.741117153  | -4.469166339 |
| H | 0.339199938  | 3.335741747  | -6.177563308 |
| H | -1.540923001 | 3.466802542  | -0.631013700 |

<sup>2</sup>TS<sub>HA,CHD</sub>:

|    |             |              |              |
|----|-------------|--------------|--------------|
| Ni | 0.056345966 | -0.183037213 | -0.153862383 |
| O  | 0.073159080 | -0.504825127 | 1.794713481  |
| N  | 2.177220158 | 0.061794200  | -0.070068036 |
| C  | 1.359584733 | 2.445150228  | 0.180257902  |
| H  | 1.380878065 | 3.299883972  | 0.871342566  |
| H  | 1.725247725 | 2.813178795  | -0.782611799 |
| C  | 2.272745435 | 1.348326308  | 0.704466803  |
| H  | 3.312080755 | 1.713110717  | 0.711388736  |
| H  | 1.995641411 | 1.079630445  | 1.726997684  |
| C  | 2.634276198 | 0.140654456  | -1.498031225 |
| H  | 3.710894694 | 0.374670647  | -1.536298733 |
| H  | 2.106794096 | 0.976073272  | -1.972995651 |

|   |              |              |              |
|---|--------------|--------------|--------------|
| C | 2.380940661  | -1.147696904 | -2.315182749 |
| H | 2.974272256  | -1.975772421 | -1.914880412 |
| H | 2.794164845  | -0.962981231 | -3.316171236 |
| C | 0.921114450  | -1.602260788 | -2.534387500 |
| H | 0.347883530  | -0.787105199 | -2.996067992 |
| H | 0.926663116  | -2.438033468 | -3.252681251 |
| C | 2.956311357  | -0.945499150 | 0.723880444  |
| H | 3.927236484  | -0.522258198 | 1.017210943  |
| H | 3.150066007  | -1.840271372 | 0.140173325  |
| H | 2.375765261  | -1.209001853 | 1.608007222  |
| O | 0.003673297  | -1.932935492 | 2.093750796  |
| N | 0.168949288  | -2.018239194 | -1.291797478 |
| C | -1.279843455 | -2.340291158 | -1.580101997 |
| H | -1.403275984 | -3.422440309 | -1.712883007 |
| H | -1.566109578 | -1.870804528 | -2.525105645 |
| C | -2.159913854 | -1.841634682 | -0.430632873 |
| H | -3.196565094 | -2.188356627 | -0.561608941 |
| H | -1.779468224 | -2.215428263 | 0.524469996  |
| C | 0.780058718  | -3.217688271 | -0.634894868 |
| H | 0.704897546  | -4.090993457 | -1.298947049 |
| H | 0.261412283  | -3.403193922 | 0.304979520  |
| H | 1.824243501  | -3.045102749 | -0.400656576 |
| C | -2.375509113 | 1.729570293  | 1.097972716  |
| H | -2.904346029 | 2.335541174  | 0.352240876  |
| H | -2.845421360 | 1.991900797  | 2.055685960  |
| C | -0.906072996 | 2.186138699  | 1.216663078  |
| H | -0.895776731 | 3.260549710  | 1.464074617  |
| H | -0.421658038 | 1.633831167  | 2.025064140  |
| C | -2.657224814 | 0.227084363  | 0.891314495  |
| H | -3.747075893 | 0.064759692  | 0.916211019  |
| H | -2.197790415 | -0.332606800 | 1.704495001  |
| N | -2.105654136 | -0.339687383 | -0.393522060 |
| N | -0.061468875 | 1.979048992  | -0.024800925 |
| C | -0.612448830 | 2.741023286  | -1.190443162 |
| H | -0.550732548 | 3.823755635  | -1.008781406 |
| H | -0.034781087 | 2.504849547  | -2.087847860 |
| H | -1.649194925 | 2.483032380  | -1.371698089 |
| C | -2.848330496 | 0.203309842  | -1.577506118 |
| H | -3.138648378 | 1.236876580  | -1.404747358 |
| H | -2.240039450 | 0.166682941  | -2.483011664 |
| H | -3.768275793 | -0.373751783 | -1.746708194 |
| C | -1.771229526 | -0.901524530 | 4.694118282  |
| C | -3.029712550 | -0.400325638 | 4.697114108  |
| C | -2.622882446 | -3.089175929 | 3.854609318  |
| C | -3.887951456 | -2.610903843 | 3.847869092  |
| C | -1.461718334 | -2.251387701 | 4.198439383  |
| H | -0.663283893 | -2.769434393 | 4.741935901  |
| H | -0.772032798 | -2.068101593 | 3.106636283  |
| H | -2.436481451 | -4.129142866 | 3.597836692  |
| H | -4.718198023 | -3.262386688 | 3.585960414  |
| H | -3.217647574 | 0.601813540  | 5.075915361  |
| H | -0.945778120 | -0.298548229 | 5.062384460  |
| C | -4.227133815 | -1.198887391 | 4.250299680  |
| H | -4.983262455 | -1.214800219 | 5.055446192  |
| H | -4.743377726 | -0.680312552 | 3.420533791  |

<sup>4</sup>I<sub>HA,EB</sub>:

|   |              |              |             |
|---|--------------|--------------|-------------|
| O | -0.134665864 | -0.111968133 | 0.095758880 |
| N | -0.084597657 | -0.118148825 | 2.916040120 |
| C | 2.432500780  | 0.062592025  | 2.674834138 |
| H | 3.229593996  | 0.784146451  | 2.445095651 |
| H | 2.683927291  | -0.382906144 | 3.641766481 |
| C | 1.103743645  | 0.793476742  | 2.768834543 |
| H | 1.142196065  | 1.506722828  | 3.607793728 |
| H | 0.915219412  | 1.361218055  | 1.853519055 |
| C | -0.130264596 | -0.915572771 | 4.186481914 |
| H | -0.212505630 | -0.238405214 | 5.052643538 |
| H | 0.822170141  | -1.450168635 | 4.284664801 |
| C | -1.293239461 | -1.933278475 | 4.241017144 |
| H | -2.256161650 | -1.413856145 | 4.210745502 |
| H | -1.253039936 | -2.395796060 | 5.236394976 |

|    |              |              |              |
|----|--------------|--------------|--------------|
| C  | -1.290408135 | -3.102406525 | 3.232499930  |
| H  | -0.354763342 | -3.668029705 | 3.334442794  |
| H  | -2.110492487 | -3.788307406 | 3.499914646  |
| C  | -1.286130287 | 0.766314706  | 2.758210346  |
| H  | -1.179513929 | 1.661429607  | 3.387285195  |
| H  | -2.196306115 | 0.258259751  | 3.058708890  |
| H  | -1.359703325 | 1.044750027  | 1.707637443  |
| O  | -1.103520309 | -0.576092565 | -0.989518704 |
| N  | -1.413045280 | -2.728585563 | 1.774273237  |
| C  | -1.263754446 | -3.936297072 | 0.875977883  |
| H  | -2.251548704 | -4.359961396 | 0.652386701  |
| H  | -0.701508933 | -4.704980399 | 1.414684894  |
| C  | -0.546824980 | -3.540909238 | -0.416849745 |
| H  | -0.523276620 | -4.393012183 | -1.113352151 |
| H  | -1.054669235 | -2.703540862 | -0.899658326 |
| C  | -2.717079064 | -2.065655299 | 1.452036160  |
| H  | -3.547521681 | -2.771665082 | 1.596853697  |
| H  | -2.686950328 | -1.719126199 | 0.418877200  |
| H  | -2.879436720 | -1.199658720 | 2.083993026  |
| C  | 2.832961282  | -1.643581360 | -0.824294420 |
| H  | 3.608572802  | -2.388713835 | -0.609680733 |
| H  | 3.180904670  | -1.136482766 | -1.734872778 |
| C  | 2.811393886  | -0.558809058 | 0.273999220  |
| H  | 3.813759398  | -0.103494142 | 0.335345193  |
| H  | 2.081814108  | 0.206030748  | -0.001308201 |
| C  | 1.503147642  | -2.327863377 | -1.207729506 |
| H  | 1.695254053  | -3.018068469 | -2.045499850 |
| H  | 0.779241035  | -1.579899086 | -1.532851116 |
| N  | 0.851450637  | -3.098259356 | -0.081173080 |
| N  | 2.428110037  | -1.049671961 | 1.657449014  |
| C  | 3.387031011  | -2.088787527 | 2.152104869  |
| H  | 4.380871058  | -1.648976604 | 2.318370298  |
| H  | 3.025721468  | -2.500683572 | 3.098738709  |
| H  | 3.489496200  | -2.898613996 | 1.440445717  |
| C  | 1.660067490  | -4.307845167 | 0.283652639  |
| H  | 2.722466558  | -4.106348664 | 0.175181048  |
| H  | 1.473417785  | -4.618246936 | 1.313599516  |
| H  | 1.414806871  | -5.143987917 | -0.385757029 |
| H  | -6.507366493 | 0.429298234  | 0.183071981  |
| C  | -5.625392576 | 1.060327770  | 0.130412710  |
| C  | -5.333258065 | 1.941751538  | 1.185916758  |
| C  | -4.806933149 | 1.003205256  | -0.993819971 |
| C  | -4.203864480 | 2.776248147  | 1.098171557  |
| H  | -5.986149768 | 1.994073422  | 2.050757929  |
| C  | -3.647662492 | 1.833001798  | -1.103691719 |
| H  | -5.060658672 | 0.330528998  | -1.805814987 |
| C  | -3.376002179 | 2.725185735  | -0.017576913 |
| H  | -3.985874612 | 3.477352349  | 1.898195724  |
| H  | -2.513162694 | 3.382512150  | -0.085689854 |
| C  | -2.776717365 | 1.800253970  | -2.230814398 |
| H  | -1.601747448 | 0.258181937  | -1.173336694 |
| H  | -1.959449829 | 2.520272973  | -2.245147872 |
| C  | -2.990280636 | 0.989673970  | -3.475336884 |
| H  | -2.051433509 | 0.853362470  | -4.020447565 |
| H  | -3.405557453 | -0.004189177 | -3.271016317 |
| H  | -3.690093674 | 1.489609123  | -4.165734486 |
| Ni | 0.314506585  | -1.548906363 | 1.362173843  |

<sup>4</sup>I<sub>HA,XA</sub>:

|    |             |              |              |
|----|-------------|--------------|--------------|
| Ni | 0.154886614 | -0.257868420 | -0.264381164 |
| O  | 0.393389547 | -0.532445299 | 1.675208097  |
| N  | 2.200872011 | 0.388934846  | -0.311884598 |
| C  | 0.960430164 | 2.583688007  | -0.069158686 |
| H  | 0.866067056 | 3.457032892  | 0.592412177  |
| H  | 1.188814286 | 2.970381779  | -1.066562938 |
| C  | 2.094267147 | 1.698218880  | 0.420822629  |
| H  | 3.044014729 | 2.252433698  | 0.352471715  |
| H  | 1.936498831 | 1.423058029  | 1.467097472  |
| C  | 2.564457136 | 0.490933746  | -1.763705784 |
| H  | 3.574931026 | 0.918646267  | -1.871549643 |
| H  | 1.866600740 | 1.192072779  | -2.236756399 |
| C  | 2.517883769 | -0.858842671 | -2.517429512 |
| H  | 3.272508399 | -1.543671071 | -2.117938709 |

|   |              |              |              |
|---|--------------|--------------|--------------|
| H | 2.843279132  | -0.649171169 | -3.545541816 |
| C | 1.159814127  | -1.584171921 | -2.641996586 |
| H | 0.428336179  | -0.913341298 | -3.112427978 |
| H | 1.291180662  | -2.442290026 | -3.320720895 |
| C | 3.185322668  | -0.428358723 | 0.471785059  |
| H | 4.073122417  | 0.175432705  | 0.707003098  |
| H | 3.516411107  | -1.295117765 | -0.092097544 |
| H | 2.688076153  | -0.752232208 | 1.386541695  |
| O | 0.268264809  | -2.006824702 | 2.060769045  |
| N | 0.542343749  | -2.064334005 | -1.349040927 |
| C | -0.834238742 | -2.654609464 | -1.564792895 |
| H | -0.759464040 | -3.743647239 | -1.677570232 |
| H | -1.240055431 | -2.264754594 | -2.502523185 |
| C | -1.742246979 | -2.301540579 | -0.384483662 |
| H | -2.706212596 | -2.825424517 | -0.468259149 |
| H | -1.266499745 | -2.585582162 | 0.557872736  |
| C | 1.383805346  | -3.097232348 | -0.662700288 |
| H | 1.431958115  | -4.010128748 | -1.273787250 |
| H | 0.951585420  | -3.311052555 | 0.314456729  |
| H | 2.391844567  | -2.731913894 | -0.502050554 |
| C | -2.501191802 | 1.206548170  | 1.129212597  |
| H | -3.184656897 | 1.687826185  | 0.418987080  |
| H | -2.945053597 | 1.394105041  | 2.116397369  |
| C | -1.138485913 | 1.930579790  | 1.139113689  |
| H | -1.310027708 | 2.993482746  | 1.376782561  |
| H | -0.506892912 | 1.490745268  | 1.914232058  |
| C | -2.512808665 | -0.325699204 | 0.952825402  |
| H | -3.546380550 | -0.687169451 | 1.061771362  |
| H | -1.903766945 | -0.779087822 | 1.731925273  |
| N | -1.950402770 | -0.811237177 | -0.362743260 |
| N | -0.358250638 | 1.856472750  | -0.159689408 |
| C | -1.122728529 | 2.478368465  | -1.287480133 |
| H | -1.243586948 | 3.558802737  | -1.121963204 |
| H | -0.580624559 | 2.327999956  | -2.224753150 |
| H | -2.106752807 | 2.035933737  | -1.384521573 |
| C | -2.853496181 | -0.434941150 | -1.498931972 |
| H | -3.306967273 | 0.537157841  | -1.322107937 |
| H | -2.309815593 | -0.392335052 | -2.444642874 |
| H | -3.668452714 | -1.166051826 | -1.593060006 |
| H | -0.473060110 | -0.351283954 | 6.403162549  |
| C | -1.435189721 | -0.066406469 | 5.989363252  |
| C | -1.979122639 | 1.183238858  | 6.269586062  |
| C | -2.125367084 | -0.999396760 | 5.170856164  |
| C | -3.233770325 | 1.546794878  | 5.745250510  |
| H | -1.438514231 | 1.876466857  | 6.904688884  |
| C | -3.388132090 | -0.594323607 | 4.656254947  |
| C | -3.942357229 | 0.651448812  | 4.934289275  |
| H | -3.661903051 | 2.515491803  | 5.977744271  |
| C | -2.425873785 | -3.197994666 | 4.079913859  |
| H | -4.920123478 | 0.894307446  | 4.534753843  |
| C | -3.683290943 | -2.756503716 | 3.581524865  |
| C | -2.043875315 | -4.530746529 | 3.770023629  |
| C | -4.515453267 | -3.575081252 | 2.824781425  |
| H | -1.095387856 | -4.900424534 | 4.147604535  |
| C | -2.868776786 | -5.355696218 | 3.011523238  |
| C | -4.106452676 | -4.882696862 | 2.535802006  |
| H | -5.471469498 | -3.189246314 | 2.490823325  |
| H | -2.561638924 | -6.373706783 | 2.797179369  |
| H | -4.753581935 | -5.533758701 | 1.958788150  |
| C | -1.630876029 | -2.300252338 | 4.854667221  |
| H | -0.696341370 | -2.641979316 | 5.288234113  |
| H | -0.184072852 | -1.934795670 | 2.934715175  |
| O | -4.133292519 | -1.452586949 | 3.833904754  |

<sup>4</sup>I<sub>HA,CHD</sub>:

|    |              |              |              |
|----|--------------|--------------|--------------|
| Ni | 0.024990861  | -0.066668690 | -0.110141569 |
| O  | -0.027703106 | -0.287469960 | 1.847445937  |
| N  | 2.163328304  | -0.079108550 | 0.079642482  |
| C  | 1.648548217  | 2.401712348  | 0.093342047  |
| H  | 1.761334962  | 3.306077061  | 0.708809318  |
| H  | 2.093050716  | 2.628701992  | -0.879941583 |

|   |              |              |              |
|---|--------------|--------------|--------------|
| C | 2.389754082  | 1.248727837  | 0.749314798  |
| H | 3.466122109  | 1.481278613  | 0.781447120  |
| H | 2.043755878  | 1.109217131  | 1.777093424  |
| C | 2.696459775  | -0.195749140 | -1.317805279 |
| H | 3.794712357  | -0.098177664 | -1.312868896 |
| H | 2.301206529  | 0.645083194  | -1.900481727 |
| C | 2.322220970  | -1.521966955 | -2.019624485 |
| H | 2.777697375  | -2.369874627 | -1.498735736 |
| H | 2.811283344  | -1.499462497 | -3.002905684 |
| C | 0.830559691  | -1.810306594 | -2.296209053 |
| H | 0.404978147  | -0.991297631 | -2.891396134 |
| H | 0.766578644  | -2.721565391 | -2.912392961 |
| C | 2.756551860  | -1.099589137 | 1.006838231  |
| H | 3.757000660  | -0.778617857 | 1.329725794  |
| H | 2.861149278  | -2.063588792 | 0.518546392  |
| H | 2.085842717  | -1.190751182 | 1.861941356  |
| O | -0.805686099 | -1.538174428 | 2.256615772  |
| N | -0.055302510 | -1.970317113 | -1.082450113 |
| C | -1.510114074 | -2.122544392 | -1.467259406 |
| H | -1.767755304 | -3.186861055 | -1.540991604 |
| H | -1.656695893 | -1.689677326 | -2.461019775 |
| C | -2.398151983 | -1.429815900 | -0.431526550 |
| H | -3.459910537 | -1.629548291 | -0.643795251 |
| H | -2.161251025 | -1.784708463 | 0.575071227  |
| C | 0.327623764  | -3.150356729 | -0.241137487 |
| H | 0.149671755  | -4.082656559 | -0.796226168 |
| H | -0.257887033 | -3.134299161 | 0.678411429  |
| H | 1.374929840  | -3.104169494 | 0.035562883  |
| C | -2.178415943 | 2.224878083  | 0.896829443  |
| H | -2.598315241 | 2.851959830  | 0.100962111  |
| H | -2.643545274 | 2.594562165  | 1.820710614  |
| C | -0.666816430 | 2.495775141  | 1.054387953  |
| H | -0.524038011 | 3.571876894  | 1.247188928  |
| H | -0.293141638 | 1.924984611  | 1.907270952  |
| C | -2.651772960 | 0.763309452  | 0.753414598  |
| H | -3.753870847 | 0.753713408  | 0.725058440  |
| H | -2.322919945 | 0.187402845  | 1.616491696  |
| N | -2.123530608 | 0.049269799  | -0.467304821 |
| N | 0.186609567  | 2.110649575  | -0.138423228 |
| C | -0.217290309 | 2.870522433  | -1.364404998 |
| H | 0.000674956  | 3.941535834  | -1.243324822 |
| H | 0.339969760  | 2.496878263  | -2.227423023 |
| H | -1.276079657 | 2.759184194  | -1.563905683 |
| C | -2.717798385 | 0.619171164  | -1.720763468 |
| H | -2.860405952 | 1.692154386  | -1.624289512 |
| H | -2.077875326 | 0.435032880  | -2.585739103 |
| H | -3.703415367 | 0.171780181  | -1.910316172 |
| C | -2.376728346 | 0.715549009  | 4.918739969  |
| C | -3.650522165 | 1.118073426  | 4.606032686  |
| C | -3.105259223 | -1.631499189 | 5.090222027  |
| C | -4.395400611 | -1.282712241 | 4.780231031  |
| C | -2.068653847 | -0.655684474 | 5.162910312  |
| H | -1.070618351 | -0.941058807 | 5.481029002  |
| H | -1.160533552 | -1.256700140 | 3.135707643  |
| H | -2.865737432 | -2.670692731 | 5.297980882  |
| H | -5.174343715 | -2.039558602 | 4.739936819  |
| H | -3.873446337 | 2.171339473  | 4.454627493  |
| H | -1.584128764 | 1.453835401  | 5.004414635  |
| C | -4.798454094 | 0.145295696  | 4.519946649  |
| H | -5.594398960 | 0.444191644  | 5.230305810  |
| H | -5.300933419 | 0.226355227  | 3.535901123  |

|                      |              |              |             |
|----------------------|--------------|--------------|-------------|
| $^2J_{\text{HA,EB}}$ |              |              |             |
| O                    | -0.082606110 | 0.196672416  | 0.336630767 |
| N                    | -0.445621801 | -0.183406473 | 3.109615766 |
| C                    | 2.045293747  | 0.252660787  | 3.268889589 |
| H                    | 2.785789690  | 1.065228298  | 3.239105386 |
| H                    | 2.208887110  | -0.284678596 | 4.207554978 |
| C                    | 0.645472370  | 0.843428881  | 3.243840635 |
| H                    | 0.490758155  | 1.448311318  | 4.151643146 |
| H                    | 0.524247242  | 1.498204392  | 2.376625188 |
| C                    | -0.586721238 | -1.131094540 | 4.264034453 |
| H                    | -0.869902289 | -0.578200659 | 5.174879156 |



|                                |              |              |              |
|--------------------------------|--------------|--------------|--------------|
| H                              | 0.395513999  | -1.580604896 | 4.452782891  |
| C                              | -1.623100956 | -2.254086207 | 4.026157497  |
| H                              | -2.625968815 | -1.829723494 | 3.915990279  |
| H                              | -1.664611943 | -2.837762596 | 4.955925890  |
| C                              | -1.353803161 | -3.274126167 | 2.898442918  |
| H                              | -0.380346818 | -3.754117088 | 3.065856925  |
| H                              | -2.117393472 | -4.065928286 | 2.963478511  |
| C                              | -1.700244459 | 0.599186085  | 2.853671141  |
| H                              | -1.776429064 | 1.432361151  | 3.566423451  |
| H                              | -2.584033227 | -0.019725679 | 2.974726477  |
| H                              | -1.648304957 | 0.970335566  | 1.829682167  |
| O                              | -1.011644548 | -0.172001936 | -0.819998781 |
| N                              | -1.329519222 | -2.723980692 | 1.491416959  |
| C                              | -0.935383338 | -3.781170846 | 0.483973560  |
| H                              | -1.834314719 | -4.249199748 | 0.062764462  |
| H                              | -0.379321438 | -4.568010440 | 1.001419720  |
| C                              | -0.090025633 | -3.153069581 | -0.625902983 |
| H                              | 0.109060548  | -3.890575847 | -1.418546622 |
| H                              | -0.605403685 | -2.292094802 | -1.059441901 |
| C                              | -2.651024274 | -2.154521817 | 1.072309820  |
| H                              | -3.403542273 | -2.953753139 | 1.010092014  |
| H                              | -2.534184967 | -1.663119670 | 0.106185557  |
| H                              | -2.992829443 | -1.408619116 | 1.780994036  |
| C                              | 3.115069322  | -0.964812611 | -0.294413531 |
| H                              | 3.921216872  | -1.666974940 | -0.048596277 |
| H                              | 3.531135276  | -0.321141732 | -1.080424344 |
| C                              | 2.830589387  | -0.032329814 | 0.901535495  |
| H                              | 3.765966000  | 0.485822002  | 1.170317378  |
| H                              | 2.084266147  | 0.706870310  | 0.602820783  |
| C                              | 1.926360870  | -1.699300344 | -0.947331535 |
| H                              | 2.295234691  | -2.251722744 | -1.826243059 |
| H                              | 1.188688065  | -0.973127602 | -1.283096810 |
| N                              | 1.199991304  | -2.657056809 | -0.031804127 |
| N                              | 2.297395615  | -0.720332688 | 2.144333973  |
| C                              | 3.269009813  | -1.736378428 | 2.661543993  |
| H                              | 4.182458534  | -1.244858548 | 3.026597970  |
| H                              | 2.816322371  | -2.289152007 | 3.488917425  |
| H                              | 3.547927757  | -2.441465933 | 1.888168653  |
| C                              | 2.061656486  | -3.838587122 | 0.300300630  |
| H                              | 3.103874269  | -3.541471254 | 0.384111173  |
| H                              | 1.760148891  | -4.301522761 | 1.241938143  |
| H                              | 1.997300991  | -4.590498600 | -0.498472329 |
| H                              | 4.329014957  | 2.547760266  | -2.386778441 |
| C                              | 3.532432332  | 2.005752867  | -2.887666197 |
| C                              | 3.850575031  | 1.007729431  | -3.825682495 |
| C                              | 2.204269524  | 2.322289815  | -2.610688892 |
| C                              | 2.814346577  | 0.331293766  | -4.494997864 |
| H                              | 4.886959552  | 0.775606033  | -4.047120515 |
| C                              | 1.133957314  | 1.651146609  | -3.278573015 |
| H                              | 1.977382049  | 3.107250630  | -1.897700373 |
| C                              | 1.485130798  | 0.644619119  | -4.231626096 |
| H                              | 3.053228276  | -0.427494682 | -5.233563888 |
| H                              | 0.690131162  | 0.131974384  | -4.765928322 |
| C                              | -0.235820514 | 1.961298206  | -3.033798930 |
| H                              | -0.720022555 | 0.480455434  | -1.506708589 |
| H                              | -0.975908922 | 1.479546353  | -3.671343196 |
| C                              | -0.712972824 | 3.033467999  | -2.096987182 |
| H                              | -1.798180098 | 2.990709885  | -1.969685937 |
| H                              | -0.256741079 | 2.946377477  | -1.101154074 |
| H                              | -0.468521755 | 4.039659885  | -2.473127737 |
| Ni                             | 0.319800859  | -1.358936484 | 1.482337953  |
| ${}^2\text{I}_{\text{HA,XA}}:$ |              |              |              |
| Ni                             | 0.096148504  | -0.009255264 | -0.137015116 |
| O                              | 0.069108871  | -0.307587614 | 1.809433317  |
| N                              | 2.222341895  | -0.280542337 | -0.019050045 |
| C                              | 1.999582321  | 2.237992871  | 0.146802248  |
| H                              | 2.227555653  | 3.085283580  | 0.809671543  |
| H                              | 2.446851624  | 2.471299423  | -0.823788938 |
| C                              | 2.616789209  | 0.971249020  | 0.716114830  |
| H                              | 3.713439885  | 1.075856463  | 0.730940871  |

|   |              |              |              |
|---|--------------|--------------|--------------|
| H | 2.276930511  | 0.812274074  | 1.743025147  |
| C | 2.702177433  | -0.376853161 | -1.436647884 |
| H | 3.803868500  | -0.411625502 | -1.462194529 |
| H | 2.397050347  | 0.538332397  | -1.957933147 |
| C | 2.152315205  | -1.604830963 | -2.199610678 |
| H | 2.518518144  | -2.530492699 | -1.744555382 |
| H | 2.612284937  | -1.579691214 | -3.196910796 |
| C | 0.629146961  | -1.700443259 | -2.437968077 |
| H | 0.284306747  | -0.800276931 | -2.964350069 |
| H | 0.440672057  | -2.555347954 | -3.107209939 |
| C | 2.712450567  | -1.414456298 | 0.832505023  |
| H | 3.749667714  | -1.229598683 | 1.145566258  |
| H | 2.695097506  | -2.353770775 | 0.288339360  |
| H | 2.054785534  | -1.478581496 | 1.699833988  |
| O | -0.758772052 | -1.541887665 | 2.174263237  |
| N | -0.231192232 | -1.838482855 | -1.203415450 |
| C | -1.706152356 | -1.804464575 | -1.537963187 |
| H | -2.086119956 | -2.827371892 | -1.654761444 |
| H | -1.835607766 | -1.304797218 | -2.502131838 |
| C | -2.473176241 | -1.072665237 | -0.434260078 |
| H | -3.557561132 | -1.143976861 | -0.609583503 |
| H | -2.241357695 | -1.503850390 | 0.543411336  |
| C | 0.041191401  | -3.106298162 | -0.452007710 |
| H | -0.253998623 | -3.974504037 | -1.058770360 |
| H | -0.514113227 | -3.087019593 | 0.485638486  |
| H | 1.093828512  | -3.193444873 | -0.207884387 |
| C | -1.803083011 | 2.466253717  | 1.044849767  |
| H | -2.165876390 | 3.166481118  | 0.282267956  |
| H | -2.201498781 | 2.851199997  | 1.992729060  |
| C | -0.268235139 | 2.556146561  | 1.171602564  |
| H | 0.002089144  | 3.600092497  | 1.401155365  |
| H | 0.056837605  | 1.914671530  | 1.993407278  |
| C | -2.438927337 | 1.073611229  | 0.859825092  |
| H | -3.535265838 | 1.179453106  | 0.881378694  |
| H | -2.136514560 | 0.425127276  | 1.680059954  |
| N | -2.036173129 | 0.366528777  | -0.413283705 |
| N | 0.509322071  | 2.126919058  | -0.058712964 |
| C | 0.167738903  | 2.980734212  | -1.240744272 |
| H | 0.499477344  | 4.016345582  | -1.077040692 |
| H | 0.667947311  | 2.591423393  | -2.131368554 |
| H | -0.900235586 | 2.989556584  | -1.421763541 |
| C | -2.605485235 | 1.059843199  | -1.614586682 |
| H | -2.620219248 | 2.136464294  | -1.465161185 |
| H | -2.022488243 | 0.846831770  | -2.512702795 |
| H | -3.642324851 | 0.736817343  | -1.782690530 |
| H | -0.284590517 | 1.401875664  | 5.734167371  |
| C | -1.272100580 | 1.664010936  | 5.367932431  |
| C | -1.638320041 | 2.999704083  | 5.225177950  |
| C | -2.181654463 | 0.617076316  | 5.061316117  |
| C | -2.926613119 | 3.341479411  | 4.770049234  |
| H | -0.932694228 | 3.782252094  | 5.483397946  |
| C | -3.472913789 | 1.001662303  | 4.602585259  |
| C | -3.848714771 | 2.334159412  | 4.458188135  |
| H | -3.216165159 | 4.382707950  | 4.680309063  |
| C | -2.888651908 | -1.749273198 | 4.951518720  |
| H | -4.854572822 | 2.562829755  | 4.125846215  |
| C | -4.164548947 | -1.325023564 | 4.486091888  |
| C | -2.704968803 | -3.145326800 | 5.138536731  |
| C | -5.197841739 | -2.216689359 | 4.219917276  |
| H | -1.745424441 | -3.499645246 | 5.502327393  |
| C | -3.732692114 | -4.044765512 | 4.874600434  |
| C | -4.981291571 | -3.585503146 | 4.414285269  |
| H | -6.151360118 | -1.831724782 | 3.878391849  |
| H | -3.573635513 | -5.106092661 | 5.031425714  |
| H | -5.781832712 | -4.289602132 | 4.216647650  |
| C | -1.880570413 | -0.770304265 | 5.204710262  |
| H | -0.918707536 | -1.074854858 | 5.604171870  |
| H | -1.036788628 | -1.307810834 | 3.092479344  |
| O | -4.430778377 | 0.035588590  | 4.273936425  |

<sup>2</sup>I<sub>HA,CHD</sub>:

|    |             |              |              |
|----|-------------|--------------|--------------|
| Ni | 0.029394718 | -0.072401714 | -0.093070720 |
| O  | 0.048658428 | -0.285291336 | 1.865150644  |

|   |              |              |              |
|---|--------------|--------------|--------------|
| N | 2.174274936  | -0.066346252 | 0.022106322  |
| C | 1.639597220  | 2.410702243  | 0.031669703  |
| H | 1.766120615  | 3.321724801  | 0.634790945  |
| H | 2.048435135  | 2.632262628  | -0.958511641 |
| C | 2.412590363  | 1.269558573  | 0.671614101  |
| H | 3.487466650  | 1.511199903  | 0.664056904  |
| H | 2.104043994  | 1.136780369  | 1.712186130  |
| C | 2.657652964  | -0.190781314 | -1.392870463 |
| H | 3.754356226  | -0.082408001 | -1.428896586 |
| H | 2.232942489  | 0.640701128  | -1.968354004 |
| C | 2.271390026  | -1.527229804 | -2.068459341 |
| H | 2.751425279  | -2.366276876 | -1.554955122 |
| H | 2.726736577  | -1.510851376 | -3.068185429 |
| C | 0.773625148  | -1.830499085 | -2.290964185 |
| H | 0.321607386  | -1.021851836 | -2.880604206 |
| H | 0.696413906  | -2.749324571 | -2.894250209 |
| C | 2.810437216  | -1.072783511 | 0.936104180  |
| H | 3.818062239  | -0.738734098 | 1.220626468  |
| H | 2.908199680  | -2.040003342 | 0.452365013  |
| H | 2.171126261  | -1.163523162 | 1.814889133  |
| O | -0.730436970 | -1.520961074 | 2.314449842  |
| N | -0.069580494 | -1.983369568 | -1.046511013 |
| C | -1.534698185 | -2.151611018 | -1.381198399 |
| H | -1.785136266 | -3.218801735 | -1.436709638 |
| H | -1.717814355 | -1.729456223 | -2.373382288 |
| C | -2.393598659 | -1.456351342 | -0.322909593 |
| H | -3.459863982 | -1.665750562 | -0.498786030 |
| H | -2.122138976 | -1.800249788 | 0.678482562  |
| C | 0.350877236  | -3.150222448 | -0.205094551 |
| H | 0.164733334  | -4.090324362 | -0.744326033 |
| H | -0.205577496 | -3.129679874 | 0.732215905  |
| H | 1.405792572  | -3.090546441 | 0.037944479  |
| C | -2.156014962 | 2.210780783  | 0.968525187  |
| H | -2.608208077 | 2.828443025  | 0.182998448  |
| H | -2.591311521 | 2.584718608  | 1.905283576  |
| C | -0.641985592 | 2.494291504  | 1.071563137  |
| H | -0.501089066 | 3.573004230  | 1.251223169  |
| H | -0.234865429 | 1.932586482  | 1.915156183  |
| C | -2.622807447 | 0.744532416  | 0.852975584  |
| H | -3.725011037 | 0.726600678  | 0.862703209  |
| H | -2.260109987 | 0.176971633  | 1.708017993  |
| N | -2.131736887 | 0.024610260  | -0.379997469 |
| N | 0.173097290  | 2.105900398  | -0.146809513 |
| C | -0.278680766 | 2.851588109  | -1.364860928 |
| H | -0.063337739 | 3.925121864  | -1.261579423 |
| H | 0.250051586  | 2.473019059  | -2.243692152 |
| H | -1.343092654 | 2.732062336  | -1.525820916 |
| C | -2.774181528 | 0.578654567  | -1.616313361 |
| H | -2.916472267 | 1.652493102  | -1.526809741 |
| H | -2.166558601 | 0.386332611  | -2.502634529 |
| H | -3.764667754 | 0.126262450  | -1.763561518 |
| C | -2.063194163 | 0.710268927  | 5.029609413  |
| C | -3.333396511 | 1.172183754  | 4.791994898  |
| C | -2.894808452 | -1.594546536 | 5.287915087  |
| C | -4.183231544 | -1.185520905 | 5.054226588  |
| C | -1.808633629 | -0.671306391 | 5.276353033  |
| H | -0.808066456 | -1.002125217 | 5.538021239  |
| H | -1.030895039 | -1.236736408 | 3.213088280  |
| H | -2.693957922 | -2.640712861 | 5.499428787  |
| H | -4.999822342 | -1.901416916 | 5.077203564  |
| H | -3.513793475 | 2.233967797  | 4.641431657  |
| H | -1.231527404 | 1.408960761  | 5.054751973  |
| C | -4.530784606 | 0.256351380  | 4.791532794  |
| H | -5.267426690 | 0.605480954  | 5.541289527  |
| H | -5.086134278 | 0.346904170  | 3.836521429  |

<sup>4</sup>R<sub>SO</sub>:

|    |              |             |              |
|----|--------------|-------------|--------------|
| Ni | 0.013097000  | 0.023163000 | -0.027939000 |
| O  | 0.039077000  | 0.089577000 | 1.979960000  |
| O  | 1.248884000  | 0.068622000 | 2.607587000  |
| N  | -1.202415000 | 1.788817000 | 0.096565000  |

|   |              |              |              |
|---|--------------|--------------|--------------|
| N | 1.746272000  | 1.055842000  | -0.714313000 |
| N | 1.181889000  | -1.802382000 | -0.243750000 |
| N | -1.841211000 | -1.068138000 | -0.289349000 |
| C | -2.938114000 | -0.037388000 | -0.176087000 |
| C | -2.509380000 | 1.213557000  | 0.572470000  |
| C | -1.216683000 | 2.320630000  | -1.309686000 |
| C | 0.166865000  | 2.793107000  | -1.812237000 |
| C | 1.280812000  | 1.738079000  | -1.980415000 |
| C | -0.852304000 | 2.862117000  | 1.087680000  |
| C | 2.741480000  | -0.045297000 | -1.004245000 |
| C | 2.540752000  | -1.195573000 | -0.015092000 |
| C | 2.384401000  | 2.011658000  | 0.247557000  |
| C | -0.739155000 | -3.113370000 | 0.847728000  |
| C | -1.828680000 | -2.019013000 | 0.892596000  |
| C | 1.213185000  | -2.573734000 | -1.531789000 |
| C | 0.744961000  | -2.690600000 | 0.898047000  |
| C | -2.07757000  | -1.804839000 | -1.573737000 |
| H | -3.819121000 | -0.475101000 | 0.315105000  |
| H | -3.244175000 | 0.222092000  | -1.193405000 |
| H | -3.306957000 | 1.969572000  | 0.497767000  |
| H | -2.359508000 | 0.993186000  | 1.632765000  |
| H | -1.924540000 | 3.162383000  | -1.382302000 |
| H | -1.589927000 | 1.527085000  | -1.968064000 |
| H | 0.528969000  | 3.628142000  | -1.204718000 |
| H | 0.003144000  | 3.220232000  | -2.810914000 |
| H | 0.934864000  | 0.945618000  | -2.657246000 |
| H | 2.142629000  | 2.222779000  | -2.466186000 |
| H | -1.713148000 | 3.529724000  | 1.234333000  |
| H | -0.018894000 | 3.466635000  | 0.747647000  |
| H | -0.576332000 | 2.400859000  | 2.034133000  |
| H | 3.764428000  | 0.345892000  | -0.934683000 |
| H | 2.599634000  | -0.385485000 | -2.033598000 |
| H | 3.328189000  | -1.953428000 | -0.141662000 |
| H | 2.572239000  | -0.824037000 | 1.012484000  |
| H | 3.280544000  | 2.460274000  | -0.204294000 |
| H | 2.654923000  | 1.471083000  | 1.154613000  |
| H | 1.699607000  | 2.801657000  | 0.534017000  |
| H | -0.918916000 | -3.788408000 | 0.002686000  |
| H | -0.904135000 | -3.734946000 | 1.738380000  |
| H | -2.811008000 | -2.516108000 | 0.945655000  |
| H | -1.703437000 | -1.410476000 | 1.791256000  |
| H | 1.365896000  | -3.600609000 | 0.903154000  |
| H | 0.946115000  | -2.146367000 | 1.820355000  |
| H | -3.088861000 | -2.236170000 | -1.588404000 |
| H | -1.980940000 | -1.113288000 | -2.414371000 |
| H | -1.362764000 | -2.607463000 | -1.704577000 |
| H | 0.418217000  | -3.314751000 | -1.553816000 |
| H | 1.092632000  | -1.915377000 | -2.393820000 |
| H | 2.166246000  | -3.111332000 | -1.627766000 |
| S | 1.544352000  | 4.144562000  | 3.911841000  |
| C | 2.594379000  | 2.711301000  | 4.560856000  |
| C | 0.204486000  | 4.149066000  | 5.244670000  |
| H | 3.493973000  | 2.680521000  | 3.943850000  |
| H | 2.045199000  | 1.773243000  | 4.469104000  |
| H | 2.874710000  | 2.904184000  | 5.598131000  |
| H | 0.656015000  | 4.349661000  | 6.217971000  |
| H | -0.488770000 | 4.952139000  | 4.990751000  |
| H | -0.320416000 | 3.191746000  | 5.259087000  |

<sup>2</sup>R<sub>SO</sub>:

|    |              |              |              |
|----|--------------|--------------|--------------|
| Ni | 0.015463000  | 0.008504000  | -0.029182000 |
| O  | 0.030632000  | 0.047697000  | 1.976322000  |
| O  | 1.254350000  | 0.050022000  | 2.597738000  |
| N  | -1.203456000 | 1.769250000  | 0.103840000  |
| N  | 1.743769000  | 1.048831000  | -0.709444000 |
| N  | 1.183175000  | -1.812218000 | -0.263969000 |
| N  | -1.839293000 | -1.084267000 | -0.308230000 |
| C  | -2.937166000 | -0.055359000 | -0.187320000 |
| C  | -2.509571000 | 1.187267000  | 0.574921000  |
| C  | -1.218746000 | 2.317003000  | -1.296077000 |
| C  | 0.164525000  | 2.795532000  | -1.793013000 |
| C  | 1.278810000  | 1.742356000  | -1.970076000 |
| C  | -0.853324000 | 2.829654000  | 1.109211000  |

|   |              |              |              |
|---|--------------|--------------|--------------|
| C | 2.741539000  | -0.048665000 | -1.008354000 |
| C | 2.541458000  | -1.205746000 | -0.027702000 |
| C | 2.380783000  | 1.995628000  | 0.262746000  |
| C | -0.735657000 | -3.135987000 | 0.815593000  |
| C | -1.825374000 | -2.042602000 | 0.868527000  |
| C | 1.217303000  | -2.574001000 | -1.557942000 |
| C | 0.747273000  | -2.710630000 | 0.870906000  |
| C | -2.074722000 | -1.812385000 | -1.597812000 |
| H | -3.818636000 | -0.498657000 | 0.297897000  |
| H | -3.241230000 | 0.213918000  | -1.202705000 |
| H | -3.307558000 | 1.943561000  | 0.509955000  |
| H | -2.356822000 | 0.954581000  | 1.632142000  |
| H | -1.927119000 | 3.158942000  | -1.358843000 |
| H | -1.591802000 | 1.530668000  | -1.963336000 |
| H | 0.525624000  | 3.624900000  | -1.177240000 |
| H | 0.001242000  | 3.231903000  | -2.787705000 |
| H | 0.933743000  | 0.955797000  | -2.654513000 |
| H | 2.141147000  | 2.230999000  | -2.450558000 |
| H | -1.717095000 | 3.489780000  | 1.270422000  |
| H | -0.025469000 | 3.444203000  | 0.773881000  |
| H | -0.570726000 | 2.353139000  | 2.046187000  |
| H | 3.763252000  | 0.344457000  | -0.934086000 |
| H | 2.601523000  | -0.380107000 | -2.040900000 |
| H | 3.329606000  | -1.962067000 | -0.157856000 |
| H | 2.567628000  | -0.840933000 | 1.002673000  |
| H | 3.281014000  | 2.442974000  | -0.181676000 |
| H | 2.643105000  | 1.447162000  | 1.167455000  |
| H | 1.698485000  | 2.786829000  | 0.550728000  |
| H | -0.914165000 | -3.805410000 | -0.034205000 |
| H | -0.900309000 | -3.763774000 | 1.701888000  |
| H | -2.807849000 | -2.539414000 | 0.919197000  |
| H | -1.697153000 | -1.439502000 | 1.770436000  |
| H | 1.371047000  | -3.618544000 | 0.867813000  |
| H | 0.945939000  | -2.172042000 | 1.796775000  |
| H | -3.085039000 | -2.245229000 | -1.615272000 |
| H | -1.979404000 | -1.114914000 | -2.433800000 |
| H | -1.358456000 | -2.613061000 | -1.734282000 |
| H | 0.418535000  | -3.310519000 | -1.590246000 |
| H | 1.105289000  | -1.908432000 | -2.415710000 |
| H | 2.168177000  | -3.115560000 | -1.652639000 |
| S | 1.493343000  | 4.196503000  | 3.849067000  |
| C | 2.594027000  | 2.772325000  | 4.432278000  |
| C | 0.299305000  | 4.258496000  | 5.312794000  |
| H | 3.465945000  | 2.764980000  | 3.775981000  |
| H | 2.057088000  | 1.826293000  | 4.350714000  |
| H | 2.917292000  | 2.956276000  | 5.458590000  |
| H | 0.850635000  | 4.487155000  | 6.226716000  |
| H | -0.411870000 | 5.059115000  | 5.104801000  |
| H | -0.226732000 | 3.307116000  | 5.414282000  |

<sup>4</sup>TS<sub>So</sub>:

|    |              |              |              |
|----|--------------|--------------|--------------|
| Ni | 0.006315000  | -0.012792000 | 0.007909000  |
| O  | -0.036557000 | -0.027876000 | 1.977315000  |
| O  | 1.716561000  | 0.027987000  | 2.539052000  |
| N  | -1.135204000 | 1.806622000  | 0.064707000  |
| N  | 1.748287000  | 0.922480000  | -0.819725000 |
| N  | 1.055203000  | -1.911633000 | -0.318864000 |
| N  | -1.937701000 | -1.021821000 | -0.293210000 |
| C  | -2.966965000 | 0.067609000  | -0.137994000 |
| C  | -2.440508000 | 1.288539000  | 0.599940000  |
| C  | -1.175942000 | 2.330223000  | -1.338600000 |
| C  | 0.211129000  | 2.706428000  | -1.907855000 |
| C  | 1.258888000  | 1.586543000  | -2.084979000 |
| C  | -0.667531000 | 2.829909000  | 1.053321000  |
| C  | 2.675821000  | -0.233880000 | -1.120821000 |
| C  | 2.444781000  | -1.372159000 | -0.124931000 |
| C  | 2.468953000  | 1.874284000  | 0.085800000  |
| C  | -0.908373000 | -3.120922000 | 0.803858000  |
| C  | -1.949965000 | -1.983608000 | 0.876368000  |
| C  | 1.017130000  | -2.695153000 | -1.594639000 |
| C  | 0.586609000  | -2.739552000 | 0.851961000  |

|   |              |              |              |
|---|--------------|--------------|--------------|
| C | -2.233342000 | -1.724975000 | -1.580618000 |
| H | -3.853855000 | -0.319487000 | 0.385588000  |
| H | -3.298346000 | 0.349731000  | -1.141726000 |
| H | -3.205285000 | 2.081875000  | 0.577537000  |
| H | -2.232240000 | 1.037820000  | 1.643493000  |
| H | -1.831043000 | 3.215647000  | -1.394403000 |
| H | -1.625938000 | 1.557139000  | -1.971949000 |
| H | 0.643150000  | 3.536813000  | -1.340349000 |
| H | 0.032614000  | 3.113935000  | -2.912241000 |
| H | 0.840497000  | 0.791929000  | -2.716939000 |
| H | 2.120659000  | 2.007615000  | -2.628162000 |
| H | -1.494014000 | 3.501287000  | 1.326764000  |
| H | 0.129365000  | 3.441245000  | 0.639671000  |
| H | -0.301641000 | 2.282951000  | 1.923251000  |
| H | 3.718849000  | 0.104655000  | -1.078014000 |
| H | 2.493087000  | -0.570448000 | -2.145456000 |
| H | 3.191240000  | -2.167660000 | -0.280344000 |
| H | 2.522521000  | -1.008788000 | 0.905270000  |
| H | 3.408186000  | 2.204291000  | -0.382275000 |
| H | 2.661136000  | 1.370626000  | 1.035329000  |
| H | 1.857378000  | 2.746708000  | 0.290750000  |
| H | -1.120887000 | -3.783109000 | -0.044372000 |
| H | -1.088817000 | -3.744637000 | 1.690719000  |
| H | -2.955311000 | -2.431820000 | 0.947410000  |
| H | -1.749070000 | -1.386662000 | 1.769392000  |
| H | 1.185605000  | -3.663972000 | 0.904465000  |
| H | 0.771546000  | -2.128693000 | 1.736374000  |
| H | -3.262043000 | -2.115209000 | -1.582882000 |
| H | -2.125384000 | -1.024941000 | -2.413409000 |
| H | -1.553735000 | -2.553582000 | -1.739636000 |
| H | 0.173117000  | -3.380248000 | -1.601899000 |
| H | 0.934310000  | -2.039293000 | -2.463534000 |
| H | 1.930021000  | -3.299383000 | -1.696489000 |
| S | 2.213280000  | 0.059165000  | 4.396747000  |
| C | 1.332570000  | -1.537723000 | 4.876326000  |
| C | 0.874981000  | 1.292175000  | 4.894463000  |
| H | 1.980046000  | -2.356388000 | 4.564031000  |
| H | 0.393430000  | -1.550474000 | 4.323433000  |
| H | 1.181569000  | -1.556479000 | 5.955440000  |
| H | 0.615830000  | 1.136164000  | 5.942474000  |
| H | 1.291505000  | 2.287477000  | 4.741457000  |
| H | 0.038127000  | 1.103267000  | 4.218362000  |

<sup>2</sup>TS<sub>So</sub>:

|    |              |              |              |
|----|--------------|--------------|--------------|
| Ni | 0.007334000  | -0.005975000 | 0.018740000  |
| O  | 0.030504000  | -0.018846000 | 1.977585000  |
| O  | 1.763615000  | -0.042754000 | 2.678045000  |
| N  | -1.063264000 | 1.839055000  | 0.091300000  |
| N  | 1.798750000  | 0.893863000  | -0.783242000 |
| N  | 1.031322000  | -1.934888000 | -0.284525000 |
| N  | -1.935025000 | -0.959070000 | -0.271184000 |
| C  | -2.940517000 | 0.155078000  | -0.130932000 |
| C  | -2.390777000 | 1.362753000  | 0.611534000  |
| C  | -1.077195000 | 2.383450000  | -1.305550000 |
| C  | 0.324166000  | 2.733132000  | -1.858447000 |
| C  | 1.347719000  | 1.591384000  | -2.042907000 |
| C  | -0.563464000 | 2.831403000  | 1.098499000  |
| C  | 2.688592000  | -0.289270000 | -1.082934000 |
| C  | 2.426134000  | -1.415047000 | -0.078985000 |
| C  | 2.534649000  | 1.803324000  | 0.151916000  |
| C  | -0.967877000 | -3.081451000 | 0.836859000  |
| C  | -1.972227000 | -1.910790000 | 0.906660000  |
| C  | 0.994225000  | -2.733677000 | -1.550404000 |
| C  | 0.537048000  | -2.741715000 | 0.889860000  |
| C  | -2.235720000 | -1.661430000 | -1.557830000 |
| H  | -3.842314000 | -0.209815000 | 0.382086000  |
| H  | -3.250623000 | 0.443658000  | -1.139392000 |
| H  | -3.130708000 | 2.178688000  | 0.578250000  |
| H  | -2.203847000 | 1.108990000  | 1.658068000  |
| H  | -1.708034000 | 3.286673000  | -1.352192000 |
| H  | -1.542378000 | 1.631780000  | -1.953979000 |
| H  | 0.770393000  | 3.545525000  | -1.276178000 |
| H  | 0.163104000  | 3.158640000  | -2.858572000 |

|   |              |              |              |
|---|--------------|--------------|--------------|
| H | 0.918255000  | 0.819380000  | -2.694780000 |
| H | 2.226126000  | 2.002173000  | -2.567357000 |
| H | -1.371923000 | 3.516620000  | 1.390994000  |
| H | 0.246469000  | 3.430370000  | 0.692341000  |
| H | -0.205883000 | 2.253491000  | 1.952407000  |
| H | 3.742560000  | 0.016215000  | -1.046152000 |
| H | 2.490607000  | -0.624724000 | -2.104887000 |
| H | 3.161770000  | -2.223771000 | -0.216444000 |
| H | 2.499353000  | -1.041970000 | 0.947918000  |
| H | 3.504426000  | 2.086662000  | -0.282296000 |
| H | 2.673364000  | 1.290909000  | 1.106317000  |
| H | 1.963960000  | 2.705968000  | 0.339653000  |
| H | -1.196740000 | -3.735378000 | -0.013438000 |
| H | -1.170089000 | -3.700138000 | 1.722660000  |
| H | -2.991147000 | -2.325051000 | 0.986891000  |
| H | -1.745260000 | -1.312578000 | 1.793062000  |
| H | 1.111362000  | -3.681284000 | 0.952751000  |
| H | 0.732544000  | -2.126810000 | 1.769166000  |
| H | -3.272152000 | -2.029801000 | -1.565853000 |
| H | -2.106244000 | -0.967046000 | -2.392177000 |
| H | -1.572417000 | -2.504592000 | -1.708171000 |
| H | 0.124631000  | -3.386135000 | -1.569111000 |
| H | 0.952153000  | -2.086576000 | -2.428891000 |
| H | 1.886729000  | -3.371258000 | -1.625770000 |
| S | 2.082015000  | -0.122809000 | 4.516964000  |
| C | 1.278520000  | -1.790358000 | 4.876998000  |
| C | 0.632676000  | 0.994676000  | 4.981923000  |
| H | 1.979235000  | -2.557789000 | 4.550826000  |
| H | 0.358855000  | -1.824372000 | 4.293196000  |
| H | 1.089197000  | -1.872794000 | 5.948043000  |
| H | 0.291586000  | 0.744533000  | 5.987072000  |
| H | 1.001214000  | 2.019027000  | 4.939610000  |
| H | -0.117374000 | 0.807464000  | 4.207239000  |

<sup>4</sup>P<sub>so</sub>:

|    |              |              |              |
|----|--------------|--------------|--------------|
| Ni | 0.005371000  | -0.000822000 | -0.006468000 |
| O  | 0.014640000  | -0.009774000 | 1.913454000  |
| O  | 4.436569000  | -0.006583000 | 1.962013000  |
| N  | -1.169335000 | 1.807019000  | 0.027809000  |
| N  | 1.804909000  | 0.975756000  | -0.572579000 |
| N  | 1.122316000  | -1.877027000 | -0.145900000 |
| N  | -1.859108000 | -1.036240000 | -0.438620000 |
| C  | -2.915988000 | 0.036909000  | -0.441216000 |
| C  | -2.527156000 | 1.260322000  | 0.369779000  |
| C  | -1.049175000 | 2.403724000  | -1.343387000 |
| C  | 0.393110000  | 2.803840000  | -1.726978000 |
| C  | 1.446025000  | 1.682937000  | -1.854729000 |
| C  | -0.855063000 | 2.797673000  | 1.108290000  |
| C  | 2.780349000  | -0.160383000 | -0.802264000 |
| C  | 2.473984000  | -1.298639000 | 0.170553000  |
| C  | 2.419515000  | 1.905380000  | 0.431496000  |
| C  | -0.919994000 | -3.073280000 | 0.842078000  |
| C  | -1.968909000 | -1.943401000 | 0.770699000  |
| C  | 1.234697000  | -2.707814000 | -1.386120000 |
| C  | 0.562051000  | -2.677375000 | 1.002737000  |
| C  | -2.019807000 | -1.802951000 | -1.713919000 |
| H  | -3.866717000 | -0.366580000 | -0.062112000 |
| H  | -3.088362000 | 0.316305000  | -1.484427000 |
| H  | -3.294540000 | 2.040309000  | 0.242114000  |
| H  | -2.475533000 | 1.007610000  | 1.431263000  |
| H  | -1.697417000 | 3.291719000  | -1.425457000 |
| H  | -1.421219000 | 1.665891000  | -2.063651000 |
| H  | 0.764227000  | 3.586237000  | -1.057431000 |
| H  | 0.329591000  | 3.280043000  | -2.714513000 |
| H  | 1.087440000  | 0.917748000  | -2.556596000 |
| H  | 2.358749000  | 2.118524000  | -2.292637000 |
| H  | -1.710803000 | 3.468452000  | 1.269045000  |
| H  | 0.001115000  | 3.411030000  | 0.844433000  |
| H  | -0.640055000 | 2.238343000  | 2.019698000  |
| H  | 3.805257000  | 0.187917000  | -0.637999000 |
| H  | 2.694158000  | -0.489288000 | -1.841869000 |

|   |              |              |              |
|---|--------------|--------------|--------------|
| H | 3.251228000  | -2.073658000 | 0.104360000  |
| H | 2.471143000  | -0.921633000 | 1.193658000  |
| H | 3.229393000  | 2.479617000  | -0.042157000 |
| H | 2.849565000  | 1.321822000  | 1.246752000  |
| H | 1.680844000  | 2.588413000  | 0.833546000  |
| H | -1.051758000 | -3.767156000 | 0.003739000  |
| H | -1.176052000 | -3.661732000 | 1.733583000  |
| H | -2.972953000 | -2.398581000 | 0.774572000  |
| H | -1.870563000 | -1.302649000 | 1.651839000  |
| H | 1.160786000  | -3.592827000 | 1.137426000  |
| H | 0.676268000  | -2.045543000 | 1.887909000  |
| H | -3.038662000 | -2.209241000 | -1.795478000 |
| H | -1.838630000 | -1.138673000 | -2.562757000 |
| H | -1.317797000 | -2.626427000 | -1.766885000 |
| H | 0.393171000  | -3.391368000 | -1.473465000 |
| H | 1.262982000  | -2.080763000 | -2.280005000 |
| H | 2.151034000  | -3.314602000 | -1.355017000 |
| S | 5.794272000  | -0.028496000 | 2.973640000  |
| C | 5.666535000  | -1.668167000 | 3.924399000  |
| C | 5.341785000  | 1.130096000  | 4.409039000  |
| H | 5.836551000  | -2.457516000 | 3.193699000  |
| H | 4.663420000  | -1.740473000 | 4.348575000  |
| H | 6.438492000  | -1.680274000 | 4.695768000  |
| H | 6.123372000  | 1.061880000  | 5.167921000  |
| H | 5.295587000  | 2.133501000  | 3.987997000  |
| H | 4.367405000  | 0.827941000  | 4.795206000  |

<sup>2</sup>P<sub>so</sub>:

|    |              |              |              |
|----|--------------|--------------|--------------|
| Ni | -0.014175000 | -0.000537000 | -0.017891000 |
| O  | 0.000777000  | -0.001187000 | 1.939842000  |
| O  | 3.182247000  | -0.023906000 | 2.555042000  |
| N  | -1.158465000 | 1.821671000  | 0.031326000  |
| N  | 1.748983000  | 0.931892000  | -0.760386000 |
| N  | 1.051446000  | -1.901164000 | -0.275663000 |
| N  | -1.930077000 | -1.006778000 | -0.336298000 |
| C  | -2.974084000 | 0.076690000  | -0.236099000 |
| C  | -2.487459000 | 1.307801000  | 0.510342000  |
| C  | -1.147094000 | 2.359849000  | -1.369252000 |
| C  | 0.262485000  | 2.735334000  | -1.880350000 |
| C  | 1.303055000  | 1.606067000  | -2.036324000 |
| C  | -0.734783000 | 2.846318000  | 1.042085000  |
| C  | 2.689981000  | -0.221411000 | -1.041714000 |
| C  | 2.437050000  | -1.357259000 | -0.050557000 |
| C  | 2.450064000  | 1.877895000  | 0.169965000  |
| C  | -0.935027000 | -3.093843000 | 0.820487000  |
| C  | -1.972878000 | -1.950510000 | 0.849181000  |
| C  | 1.053474000  | -2.705924000 | -1.539604000 |
| C  | 0.560172000  | -2.718959000 | 0.891909000  |
| C  | -2.183675000 | -1.734485000 | -1.620963000 |
| H  | -3.879542000 | -0.313390000 | 0.251233000  |
| H  | -3.260644000 | 0.346612000  | -1.256462000 |
| H  | -3.250669000 | 2.099334000  | 0.440781000  |
| H  | -2.340369000 | 1.077264000  | 1.569070000  |
| H  | -1.797945000 | 3.247117000  | -1.436811000 |
| H  | -1.576583000 | 1.594406000  | -2.026770000 |
| H  | 0.682383000  | 3.550349000  | -1.282299000 |
| H  | 0.123500000  | 3.161629000  | -2.883115000 |
| H  | 0.896188000  | 0.820565000  | -2.687818000 |
| H  | 2.185816000  | 2.021945000  | -2.547727000 |
| H  | -1.571563000 | 3.521079000  | 1.270517000  |
| H  | 0.086223000  | 3.450698000  | 0.669255000  |
| H  | -0.416642000 | 2.305911000  | 1.934324000  |
| H  | 3.728595000  | 0.122096000  | -0.965379000 |
| H  | 2.534658000  | -0.553100000 | -2.072827000 |
| H  | 3.184816000  | -2.153172000 | -0.192667000 |
| H  | 2.522106000  | -0.995484000 | 0.981869000  |
| H  | 3.330524000  | 2.304971000  | -0.332794000 |
| H  | 2.762274000  | 1.335768000  | 1.068591000  |
| H  | 1.789434000  | 2.685149000  | 0.467640000  |
| H  | -1.133526000 | -3.766723000 | -0.022447000 |
| H  | -1.138230000 | -3.701279000 | 1.713145000  |
| H  | -2.980665000 | -2.394725000 | 0.901288000  |
| H  | -1.808091000 | -1.343600000 | 1.743561000  |



|   |              |              |              |
|---|--------------|--------------|--------------|
| H | 1.155582000  | -3.643365000 | 0.964058000  |
| H | 0.728527000  | -2.104186000 | 1.777167000  |
| H | -3.214425000 | -2.116169000 | -1.651096000 |
| H | -2.039679000 | -1.051442000 | -2.461950000 |
| H | -1.506126000 | -2.570766000 | -1.738192000 |
| H | 0.202453000  | -3.381228000 | -1.571775000 |
| H | 1.015043000  | -2.062117000 | -2.420207000 |
| H | 1.962589000  | -3.320338000 | -1.594460000 |
| S | 3.150965000  | 0.069891000  | 4.251344000  |
| C | 2.947813000  | -1.736827000 | 4.789809000  |
| C | 1.402511000  | 0.670279000  | 4.689845000  |
| H | 3.831955000  | -2.257840000 | 4.425964000  |
| H | 2.043001000  | -2.133961000 | 4.327722000  |
| H | 2.894073000  | -1.770195000 | 5.878911000  |
| H | 1.147413000  | 0.282243000  | 5.677798000  |
| H | 1.439162000  | 1.759560000  | 4.704071000  |
| H | 0.734978000  | 0.315825000  | 3.895071000  |

<sup>4</sup>R<sub>PO</sub>:

|    |              |              |              |
|----|--------------|--------------|--------------|
| Ni | 0.434871062  | 0.388111971  | -0.420534987 |
| O  | 1.060037484  | 1.262516542  | 1.265558194  |
| O  | 1.824348385  | 2.310182096  | 1.180264361  |
| N  | -1.552359746 | 0.789381218  | 0.307515460  |
| N  | 0.392452749  | 1.918700628  | -1.913547505 |
| N  | 2.391377322  | -0.123516990 | -1.208818220 |
| N  | 0.126734363  | -1.623671113 | 0.296359222  |
| C  | -1.216426608 | -1.630565070 | 0.954816715  |
| C  | -1.704843784 | -0.252917507 | 1.362300918  |
| C  | -2.414336890 | 0.583037529  | -0.885983577 |
| C  | -2.159882230 | 1.576858072  | -2.036208077 |
| C  | -0.793622871 | 1.550763351  | -2.745411276 |
| C  | -1.872645030 | 2.075026037  | 0.975437393  |
| C  | 1.674922485  | 1.726418915  | -2.661595175 |
| C  | 2.765236775  | 1.224975632  | -1.715713692 |
| C  | 0.334572423  | 3.333381751  | -1.474231344 |
| C  | 2.664146061  | -1.779365157 | 0.718396193  |
| C  | 1.236059564  | -1.785784919 | 1.294217721  |
| C  | 2.581063586  | -1.105854164 | -2.306863932 |
| C  | 3.188848831  | -0.528683402 | -0.010430181 |
| C  | 0.122475745  | -2.754565719 | -0.662630326 |
| H  | -1.207542302 | -2.277984565 | 1.838783673  |
| H  | -1.920926469 | -2.078674221 | 0.252569456  |
| H  | -2.754796310 | -0.331019725 | 1.675936796  |
| H  | -1.142508853 | 0.103659672  | 2.225465255  |
| H  | -3.474211105 | 0.645908439  | -0.598525035 |
| H  | -2.251035687 | -0.435052532 | -1.250777202 |
| H  | -2.406834044 | 2.594234242  | -1.727039067 |
| H  | -2.898364831 | 1.340544998  | -2.809932161 |
| H  | -0.612152113 | 0.544035798  | -3.136793201 |
| H  | -0.849267819 | 2.218033722  | -3.617086280 |
| H  | -2.857735385 | 2.016624449  | 1.454604081  |
| H  | -1.898393033 | 2.897589431  | 0.269870848  |
| H  | -1.118453132 | 2.288551440  | 1.728806107  |
| H  | 1.984077459  | 2.665082796  | -3.132078506 |
| H  | 1.509633096  | 1.015316757  | -3.471767084 |
| H  | 3.733192680  | 1.195703452  | -2.232580665 |
| H  | 2.856967965  | 1.896182545  | -0.861508299 |
| H  | 0.313031307  | 4.002382144  | -2.343278647 |
| H  | 1.204185691  | 3.556386636  | -0.860355361 |
| H  | -0.544321468 | 3.522076816  | -0.869530221 |
| H  | 2.830484040  | -2.674655942 | 0.113038703  |
| H  | 3.319464952  | -1.912413094 | 1.585491033  |
| H  | 1.092754148  | -2.737299205 | 1.823011828  |
| H  | 1.135669714  | -0.994559891 | 2.035140039  |
| H  | 4.228677825  | -0.716329848 | -0.312771788 |
| H  | 3.201314015  | 0.316939487  | 0.672523345  |
| H  | -0.125666903 | -3.692737423 | -0.151218866 |
| H  | -0.621231159 | -2.581526491 | -1.441878987 |
| H  | 1.086277247  | -2.877988664 | -1.137954090 |
| H  | 2.653311681  | -2.114794998 | -1.916065061 |
| H  | 1.756502277  | -1.080985318 | -3.018696181 |

|   |              |              |              |
|---|--------------|--------------|--------------|
| H | 3.512572971  | -0.900808424 | -2.846738086 |
| P | 1.842265772  | -1.021565256 | 5.154958640  |
| C | 2.652342240  | -1.916172291 | 6.556934495  |
| C | 4.053853311  | -1.954491043 | 6.554062963  |
| C | 1.964575796  | -2.546277002 | 7.601992021  |
| C | 4.751713464  | -2.589800824 | 7.578154886  |
| H | 4.603732202  | -1.482503364 | 5.744863234  |
| C | 2.663377050  | -3.192260083 | 8.620666855  |
| H | 0.880143241  | -2.539123219 | 7.622979779  |
| C | 4.056957724  | -3.212775025 | 8.613322887  |
| H | 5.836663211  | -2.605719027 | 7.563093212  |
| H | 2.117005380  | -3.677152906 | 9.423247550  |
| H | 4.598592232  | -3.715386506 | 9.407779183  |
| C | 0.117595633  | -1.706904904 | 5.182316296  |
| C | -0.057184566 | -3.057007269 | 4.833831869  |
| C | -1.022619402 | -0.935387016 | 5.438031427  |
| C | -1.327842564 | -3.621340386 | 4.763802439  |
| H | 0.811556179  | -3.680437407 | 4.640070267  |
| C | -2.298291639 | -1.498282753 | 5.355908148  |
| H | -0.917000127 | 0.106101027  | 5.720771717  |
| C | -2.456676055 | -2.841051739 | 5.021742636  |
| H | -1.437890072 | -4.673577748 | 4.519926753  |
| H | -3.168021393 | -0.887108071 | 5.576844845  |
| H | -3.447269582 | -3.281929011 | 4.977786421  |
| C | 1.622329462  | 0.694892936  | 5.812249098  |
| C | 1.581459430  | 1.738934692  | 4.877470684  |
| C | 1.522473253  | 1.004136461  | 7.175232827  |
| C | 1.421126812  | 3.059643388  | 5.295296788  |
| H | 1.683561553  | 1.527206919  | 3.817906633  |
| C | 1.370043661  | 2.324868857  | 7.591218022  |
| H | 1.574303456  | 0.215096008  | 7.917114882  |
| C | 1.314700292  | 3.354986669  | 6.652730942  |
| H | 1.398181130  | 3.855918923  | 4.558146809  |
| H | 1.299241748  | 2.550147594  | 8.650570222  |
| H | 1.201863517  | 4.383379202  | 6.980478282  |

<sup>2</sup>R<sub>PO</sub>:

|    |              |              |              |
|----|--------------|--------------|--------------|
| Ni | 0.429987686  | 0.408996472  | -0.430798311 |
| O  | 1.122416903  | 1.261362375  | 1.235502279  |
| O  | 1.950783136  | 2.268208427  | 1.119993338  |
| N  | -1.521531149 | 0.922112893  | 0.321819887  |
| N  | 0.442749353  | 1.921190635  | -1.937429028 |
| N  | 2.343398443  | -0.213763070 | -1.241755828 |
| N  | 0.028301403  | -1.574564335 | 0.315209089  |
| C  | -1.302845411 | -1.504272864 | 0.993854239  |
| C  | -1.709857134 | -0.098210314 | 1.392413357  |
| C  | -2.414285247 | 0.749417260  | -0.854047268 |
| C  | -2.126021095 | 1.715235724  | -2.019843406 |
| C  | -0.773970172 | 1.609605154  | -2.748074315 |
| C  | -1.758133519 | 2.230674984  | 0.981111766  |
| C  | 1.702120581  | 1.656290430  | -2.703092726 |
| C  | 2.778311768  | 1.109407475  | -1.767259656 |
| C  | 0.467178916  | 3.339819184  | -1.506676396 |
| C  | 2.559962329  | -1.855714300 | 0.704219532  |
| C  | 1.142968738  | -1.778902646 | 1.300136338  |
| C  | 2.470988960  | -1.216469451 | -2.329857243 |
| C  | 3.136085420  | -0.643141742 | -0.048109693 |
| C  | -0.047787282 | -2.716335915 | -0.627907652 |
| H  | -1.313319125 | -2.142553645 | 1.884371045  |
| H  | -2.040843298 | -1.922088959 | 0.307457254  |
| H  | -2.756682839 | -0.115689948 | 1.724800705  |
| H  | -1.112516227 | 0.239368477  | 2.239542806  |
| H  | -3.463878971 | 0.872710827  | -0.549771984 |
| H  | -2.312871853 | -0.280135509 | -1.209180000 |
| H  | -2.314596130 | 2.747468291  | -1.719453219 |
| H  | -2.887184559 | 1.509233580  | -2.780063790 |
| H  | -0.652025264 | 0.591172380  | -3.132432016 |
| H  | -0.806501221 | 2.270720853  | -3.625324016 |
| H  | -2.730989410 | 2.227213417  | 1.487555806  |
| H  | -1.763534662 | 3.044636228  | 0.265316906  |
| H  | -0.972178854 | 2.413342522  | 1.709641672  |
| H  | 2.051032925  | 2.573903724  | -3.186819546 |
| H  | 1.487640318  | 0.947414016  | -3.503645322 |

|   |              |              |              |
|---|--------------|--------------|--------------|
| H | 3.736227765  | 1.025250494  | -2.296283749 |
| H | 2.914202410  | 1.782053088  | -0.919807890 |
| H | 0.472603877  | 4.002923133  | -2.380266500 |
| H | 1.354281927  | 3.517750369  | -0.903116439 |
| H | -0.393470016 | 3.579939693  | -0.894390551 |
| H | 2.670894483  | -2.766432313 | 0.109259199  |
| H | 3.220490406  | -2.010644685 | 1.563779711  |
| H | 0.956262041  | -2.711750620 | 1.847422500  |
| H | 1.095643745  | -0.969537520 | 2.026689186  |
| H | 4.160538828  | -0.886092156 | -0.362750065 |
| H | 3.198884124  | 0.209860220  | 0.622587902  |
| H | -0.336160498 | -3.633187173 | -0.099649579 |
| H | -0.793098408 | -2.515834583 | -1.399060712 |
| H | 0.901685019  | -2.895401225 | -1.114161597 |
| H | 2.488901667  | -2.223772769 | -1.928876533 |
| H | 1.645435416  | -1.152421481 | -3.038099659 |
| H | 3.409327556  | -1.068931332 | -2.876456611 |
| P | 1.880435275  | -1.040501043 | 5.170097916  |
| C | 2.698994238  | -1.866387324 | 6.609637754  |
| C | 4.098359151  | -1.797085215 | 6.662149179  |
| C | 2.020477369  | -2.542066361 | 7.632037388  |
| C | 4.801117793  | -2.370834142 | 7.718731144  |
| H | 4.642569982  | -1.288779960 | 5.871304010  |
| C | 2.725409908  | -3.126933976 | 8.683037951  |
| H | 0.938773407  | -2.617761290 | 7.610817697  |
| C | 4.115353543  | -3.039652966 | 8.731219298  |
| H | 5.883819733  | -2.302940792 | 7.746862378  |
| H | 2.186209814  | -3.648187124 | 9.467560678  |
| H | 4.661675566  | -3.494298826 | 9.550980474  |
| C | 0.197811501  | -1.824878311 | 5.157780700  |
| C | 0.110535173  | -3.183314960 | 4.808806308  |
| C | -0.991959034 | -1.120489800 | 5.380727219  |
| C | -1.123058840 | -3.820217622 | 4.706120050  |
| H | 1.018706615  | -3.755452683 | 4.638698170  |
| C | -2.230447721 | -1.756442812 | 5.266100165  |
| H | -0.954479090 | -0.074386753 | 5.663605157  |
| C | -2.301767787 | -3.106335773 | 4.931062397  |
| H | -1.165388392 | -4.877174756 | 4.461664375  |
| H | -3.139781266 | -1.196852842 | 5.463242120  |
| H | -3.263576579 | -3.603986215 | 4.861904125  |
| C | 1.540635872  | 0.666923042  | 5.800211260  |
| C | 1.492403517  | 1.702318736  | 4.856194647  |
| C | 1.355607715  | 0.977507240  | 7.154069723  |
| C | 1.243412294  | 3.015109249  | 5.255834586  |
| H | 1.661317627  | 1.491239251  | 3.804979109  |
| C | 1.112756005  | 2.290248688  | 7.551657632  |
| H | 1.411901621  | 0.196053559  | 7.903781141  |
| C | 1.052120064  | 3.311237780  | 6.603532651  |
| H | 1.219698524  | 3.806098145  | 4.513033084  |
| H | 0.976579103  | 2.517010912  | 8.604230568  |
| H | 0.870118507  | 4.334021995  | 6.917337685  |

<sup>4</sup>TS<sub>PO</sub>:

|    |              |              |              |
|----|--------------|--------------|--------------|
| Ni | 0.274340699  | -0.173588776 | 0.066232119  |
| O  | -0.019180669 | -0.010059584 | 1.998661238  |
| O  | 0.870177170  | -0.858486305 | 2.856257020  |
| N  | 0.365512512  | 1.960236862  | -0.024921356 |
| N  | 2.332288016  | -0.490659738 | -0.418135391 |
| N  | 0.066242391  | -2.341351842 | -0.134856791 |
| N  | -1.817204954 | 0.080684266  | -0.605922243 |
| C  | -2.053577015 | 1.554231541  | -0.616057474 |
| C  | -1.054324705 | 2.338999195  | 0.214205001  |
| C  | 0.866407380  | 2.278773942  | -1.386801024 |
| C  | 2.285446763  | 1.755697987  | -1.678952855 |
| C  | 2.508774508  | 0.233944571  | -1.713005032 |
| C  | 1.144787675  | 2.675065366  | 1.013147796  |
| C  | 2.448914338  | -1.973391007 | -0.598066273 |
| C  | 1.445034574  | -2.692360331 | 0.300878078  |
| C  | 3.347121827  | -0.079374218 | 0.581493471  |
| C  | -2.368865286 | -2.121563443 | 0.601944830  |
| C  | -2.566180086 | -0.597088274 | 0.501382093  |

|   |              |              |              |
|---|--------------|--------------|--------------|
| C | -0.213626591 | -3.043812257 | -1.412863241 |
| C | -0.964964328 | -2.684844476 | 0.889783403  |
| C | -2.266363507 | -0.422265115 | -1.925555615 |
| H | -3.067972365 | 1.782064841  | -0.266434619 |
| H | -2.011577794 | 1.886292886  | -1.654267451 |
| H | -1.202513497 | 3.411447974  | 0.025068231  |
| H | -1.229244084 | 2.169121718  | 1.277047509  |
| H | 0.853786904  | 3.366887933  | -1.545302627 |
| H | 0.172517604  | 1.849246690  | -2.115087830 |
| H | 3.014976969  | 2.231263510  | -1.021200611 |
| H | 2.541609477  | 2.115771676  | -2.681177638 |
| H | 1.814894090  | -0.214689660 | -2.432478501 |
| H | 3.520657759  | 0.045275704  | -2.097966201 |
| H | 0.943829144  | 3.752710246  | 0.962439359  |
| H | 2.210766449  | 2.527840589  | 0.889313647  |
| H | 0.854679181  | 2.287826088  | 1.985171431  |
| H | 3.467156612  | -2.301111385 | -0.368198624 |
| H | 2.275426668  | -2.219665482 | -1.646308354 |
| H | 1.605251877  | -3.777706542 | 0.256111991  |
| H | 1.565630888  | -2.371370666 | 1.335308065  |
| H | 4.357486977  | -0.249753868 | 0.190954906  |
| H | 3.210994726  | -0.657475785 | 1.490429490  |
| H | 3.247444881  | 0.964556412  | 0.850755715  |
| H | -2.817113125 | -2.617284901 | -0.263466442 |
| H | -2.993159825 | -2.441322652 | 1.443503071  |
| H | -3.640525548 | -0.403848150 | 0.366403565  |
| H | -2.247966097 | -0.132220880 | 1.433555944  |
| H | -1.043950131 | -3.778322911 | 0.974261903  |
| H | -0.603941493 | -2.296657469 | 1.838466212  |
| H | -3.308609234 | -0.136096355 | -2.115486840 |
| H | -1.645818349 | 0.000013837  | -2.717345921 |
| H | -2.200381946 | -1.500075216 | -1.985590570 |
| H | -1.281005394 | -3.126877975 | -1.585652659 |
| H | 0.223903817  | -2.525616725 | -2.265882140 |
| H | 0.187901049  | -4.063276981 | -1.384840578 |
| P | 1.596837918  | -0.143390697 | 4.267910403  |
| C | 3.151457042  | 0.682920833  | 4.163475809  |
| C | 3.243280140  | 2.079161652  | 3.876114345  |
| C | 4.362881787  | -0.071928514 | 4.080540531  |
| C | 4.461837138  | 2.671992595  | 3.588623051  |
| H | 2.353244330  | 2.696379403  | 3.899673516  |
| C | 5.569235898  | 0.540395555  | 3.792889090  |
| H | 4.344883753  | -1.141635319 | 4.255755724  |
| C | 5.642349808  | 1.919186801  | 3.543512890  |
| H | 4.497312405  | 3.742084137  | 3.405861900  |
| H | 6.472602233  | -0.061500870 | 3.765489481  |
| H | 6.592819400  | 2.392160790  | 3.325157265  |
| C | 1.767983015  | -1.663052618 | 5.243624042  |
| C | 0.952213918  | -2.783867516 | 5.012733254  |
| C | 2.646756322  | -1.683513035 | 6.341775303  |
| C | 1.029962571  | -3.896855041 | 5.845872913  |
| H | 0.261873429  | -2.781306803 | 4.180062671  |
| C | 2.727595018  | -2.803766676 | 7.160265178  |
| H | 3.261587181  | -0.818834028 | 6.562183506  |
| C | 1.919817643  | -3.915661687 | 6.917165903  |
| H | 0.392256475  | -4.753950313 | 5.654728206  |
| H | 3.413575467  | -2.802209927 | 8.000688107  |
| H | 1.979583668  | -4.784914581 | 7.563114363  |
| C | 0.319849935  | 0.936522413  | 4.952254679  |
| C | -1.037894006 | 0.644725217  | 4.731318305  |
| C | 0.653723439  | 1.957261686  | 5.860201324  |
| C | -2.028229341 | 1.373293301  | 5.384592337  |
| H | -1.309908862 | -0.142284273 | 4.041901454  |
| C | -0.342436771 | 2.690595016  | 6.493953347  |
| H | 1.692036698  | 2.165720597  | 6.088663534  |
| C | -1.688270169 | 2.403073598  | 6.259211590  |
| H | -3.072478927 | 1.132930909  | 5.211556228  |
| H | -0.066644628 | 3.476226253  | 7.189301960  |
| H | -2.463080325 | 2.968193899  | 6.766222257  |

<sup>2</sup>TS<sub>PO</sub>:

|    |             |             |              |
|----|-------------|-------------|--------------|
| Ni | 0.224843814 | 0.009454516 | -0.133929499 |
| O  | 0.289351599 | 0.104810577 | 1.837738439  |

|   |              |              |              |
|---|--------------|--------------|--------------|
| O | 1.599964104  | -0.093719525 | 2.356763737  |
| N | -0.145723508 | 2.109967649  | -0.159831037 |
| N | 2.198190590  | 0.165890671  | -1.015616322 |
| N | 0.497958580  | -2.163357927 | -0.303431724 |
| N | -1.933055742 | -0.222666125 | -0.338347876 |
| C | -2.481539317 | 1.162967016  | -0.274516610 |
| C | -1.536804229 | 2.168800838  | 0.361681071  |
| C | -0.001538565 | 2.534898643  | -1.574260325 |
| C | 1.404945947  | 2.324548793  | -2.168679648 |
| C | 1.948170690  | 0.889473836  | -2.295750674 |
| C | 0.659658484  | 2.955461629  | 0.751982406  |
| C | 2.584247012  | -1.260269972 | -1.242431788 |
| C | 1.976459443  | -2.153329340 | -0.160047404 |
| C | 3.277961327  | 0.803339923  | -0.230547343 |
| C | -1.717909390 | -2.453563716 | 0.923624728  |
| C | -2.270944290 | -1.015782847 | 0.885615641  |
| C | 0.144433316  | -2.985152050 | -1.484966476 |
| C | -0.194018461 | -2.676884833 | 0.914691322  |
| C | -2.511614629 | -0.850877711 | -1.547276890 |
| H | -3.435096189 | 1.173950984  | 0.268698205  |
| H | -2.714258947 | 1.470061109  | -1.295145434 |
| H | -1.955509604 | 3.177478108  | 0.232411275  |
| H | -1.454488732 | 1.983152275  | 1.432734871  |
| H | -0.266792490 | 3.597903399  | -1.678472799 |
| H | -0.724686420 | 1.972800222  | -2.171446298 |
| H | 2.133536044  | 2.961219475  | -1.663231875 |
| H | 1.362296452  | 2.717253658  | -3.190475375 |
| H | 1.240001824  | 0.287829488  | -2.874587266 |
| H | 2.877147348  | 0.929850169  | -2.883696964 |
| H | 0.210627180  | 3.952760214  | 0.845113247  |
| H | 1.670599261  | 3.084099628  | 0.380864987  |
| H | 0.699733405  | 2.469024519  | 1.723958880  |
| H | 3.674660374  | -1.362157898 | -1.247462620 |
| H | 2.243510646  | -1.566874109 | -2.231939216 |
| H | 2.386163209  | -3.170190734 | -0.235786265 |
| H | 2.215379404  | -1.758461406 | 0.828345649  |
| H | 4.219008207  | 0.796690484  | -0.796819133 |
| H | 3.405590121  | 0.266657967  | 0.706733849  |
| H | 3.030016210  | 1.829401795  | 0.016733634  |
| H | -2.205703426 | -3.064529854 | 0.158967253  |
| H | -2.072940936 | -2.876962639 | 1.869676522  |
| H | -3.366422463 | -1.073015719 | 0.974897973  |
| H | -1.886590274 | -0.463307201 | 1.741488556  |
| H | -0.003560217 | -3.755356410 | 1.017787478  |
| H | 0.247362349  | -2.166596785 | 1.766796074  |
| H | -3.608497846 | -0.821416115 | -1.515530731 |
| H | -2.179691809 | -0.317876966 | -2.439129305 |
| H | -2.207064750 | -1.884539819 | -1.642526014 |
| H | -0.902373778 | -3.267431823 | -1.464136482 |
| H | 0.326188348  | -2.452788819 | -2.418003078 |
| H | 0.728610497  | -3.913695508 | -1.496733109 |
| P | 1.751604969  | -0.337667322 | 4.345711814  |
| C | 3.504507558  | 0.113957734  | 4.482586630  |
| C | 4.014963665  | 1.130644150  | 3.656190959  |
| C | 4.371730350  | -0.521349113 | 5.385531552  |
| C | 5.355181068  | 1.495377815  | 3.732600381  |
| H | 3.354775346  | 1.632898778  | 2.961056495  |
| C | 5.713991773  | -0.157697535 | 5.448083470  |
| H | 3.999411804  | -1.292682972 | 6.047991798  |
| C | 6.211575112  | 0.849211977  | 4.623028855  |
| H | 5.733130065  | 2.288608693  | 3.095523295  |
| H | 6.369750482  | -0.657062994 | 6.152851187  |
| H | 7.256943744  | 1.133454777  | 4.678486729  |
| C | 1.454677455  | -1.756720692 | 5.456299875  |
| C | 2.063324126  | -2.984881818 | 5.131927950  |
| C | 0.541166097  | -1.719811345 | 6.524370088  |
| C | 1.793563063  | -4.127985027 | 5.875276271  |
| H | 2.753311152  | -3.042495592 | 4.294740956  |
| C | 0.263594655  | -2.873638209 | 7.253730915  |
| H | 0.059458002  | -0.788335299 | 6.796983527  |
| C | 0.888676365  | -4.078952801 | 6.937962136  |

|   |              |              |             |
|---|--------------|--------------|-------------|
| H | 2.284317125  | -5.062229948 | 5.622109382 |
| H | -0.435610314 | -2.825627667 | 8.082543840 |
| H | 0.672425876  | -4.973455830 | 7.512734014 |
| C | 0.742896470  | 1.040356985  | 4.971179134 |
| C | -0.641161678 | 1.020552491  | 4.739159947 |
| C | 1.304368583  | 2.126644570  | 5.656034115 |
| C | -1.445868570 | 2.059910763  | 5.199213484 |
| H | -1.084997034 | 0.191494105  | 4.200695839 |
| C | 0.494886055  | 3.166131129  | 6.108517169 |
| H | 2.370444877  | 2.156363096  | 5.848616707 |
| C | -0.880083371 | 3.135283411  | 5.882673271 |
| H | -2.517056586 | 2.029709913  | 5.027156150 |
| H | 0.939318062  | 3.995125120  | 6.648661370 |
| H | -1.509036316 | 3.942083733  | 6.244078404 |

<sup>4</sup>P<sub>PO</sub>:

|    |              |              |              |
|----|--------------|--------------|--------------|
| Ni | -0.435189979 | 0.048289795  | -0.352134552 |
| O  | -0.723081750 | 0.501004898  | 1.455616822  |
| O  | 2.672043588  | -0.340712280 | 3.020403285  |
| N  | -0.963185913 | 2.061637626  | -0.919991637 |
| N  | 1.644915081  | 0.303548465  | -0.702247028 |
| N  | 0.036112654  | -2.048624901 | 0.009291401  |
| N  | -2.441716010 | -0.486555095 | -1.036435181 |
| C  | -3.097521318 | 0.800883202  | -1.405719055 |
| C  | -2.443794465 | 2.024982452  | -0.788218949 |
| C  | -0.469481117 | 2.219809815  | -2.312101140 |
| C  | 1.059381045  | 2.092439460  | -2.459853347 |
| C  | 1.722291160  | 0.744265741  | -2.125286051 |
| C  | -0.512886650 | 3.179957680  | -0.053287290 |
| C  | 2.228448879  | -1.063550554 | -0.514708815 |
| C  | 1.419377529  | -1.839968529 | 0.520705166  |
| C  | 2.366413196  | 1.229683120  | 0.207727133  |
| C  | -2.400365793 | -2.405535601 | 0.679449208  |
| C  | -3.026579969 | -1.077640346 | 0.212149300  |
| C  | 0.078160317  | -3.093011764 | -1.042812388 |
| C  | -0.917130968 | -2.434870375 | 1.091449832  |
| C  | -2.632001468 | -1.398907625 | -2.188176338 |
| H  | -4.159201388 | 0.783769861  | -1.129617101 |
| H  | -3.070782682 | 0.881492803  | -2.493353698 |
| H  | -2.892575414 | 2.924644864  | -1.232934188 |
| H  | -2.648313932 | 2.062194941  | 0.282970624  |
| H  | -0.780869205 | 3.195046623  | -2.714664649 |
| H  | -0.951250284 | 1.458495104  | -2.932658839 |
| H  | 1.565889080  | 2.900331130  | -1.928687589 |
| H  | 1.278244496  | 2.278389116  | -3.516965470 |
| H  | 1.266503889  | -0.043310386 | -2.736170400 |
| H  | 2.776872804  | 0.801937422  | -2.430612671 |
| H  | -1.113746065 | 4.076482725  | -0.248524864 |
| H  | 0.523599349  | 3.434714728  | -0.243090804 |
| H  | -0.611604550 | 2.877223379  | 0.986743652  |
| H  | 3.269256222  | -0.985912091 | -0.188757827 |
| H  | 2.235402617  | -1.579705725 | -1.476321725 |
| H  | 1.904060090  | -2.802149490 | 0.731109739  |
| H  | 1.390888506  | -1.284062411 | 1.457522674  |
| H  | 3.398008627  | 1.364640935  | -0.143120001 |
| H  | 2.385056700  | 0.812830963  | 1.213506544  |
| H  | 1.879706707  | 2.196177035  | 0.249962313  |
| H  | -2.623130834 | -3.200145787 | -0.038158285 |
| H  | -2.961843742 | -2.690222195 | 1.575900382  |
| H  | -4.100201587 | -1.248968137 | 0.045497287  |
| H  | -2.916849965 | -0.335845853 | 1.002258983  |
| H  | -0.675457178 | -3.446230930 | 1.447797807  |
| H  | -0.762158960 | -1.737120489 | 1.910879957  |
| H  | -3.696994535 | -1.498928836 | -2.433217080 |
| H  | -2.113813221 | -1.006153545 | -3.064213119 |
| H  | -2.241666457 | -2.386200595 | -1.982140502 |
| H  | -0.908187343 | -3.506006051 | -1.225554875 |
| H  | 0.456358738  | -2.700070827 | -1.986387767 |
| H  | 0.723359166  | -3.922922614 | -0.731884076 |
| P  | 2.719292863  | -0.256289462 | 4.530956393  |
| C  | 4.415049579  | 0.026019921  | 5.149555178  |
| C  | 5.291252298  | 0.764468208  | 4.344569885  |
| C  | 4.856410077  | -0.452223404 | 6.388906516  |

|   |              |              |             |
|---|--------------|--------------|-------------|
| C | 6.586735566  | 1.029899110  | 4.779523406 |
| H | 4.958344496  | 1.118271529  | 3.374902305 |
| C | 6.154134802  | -0.184113636 | 6.821002662 |
| H | 4.196276416  | -1.044109755 | 7.014248734 |
| C | 7.018347467  | 0.558392580  | 6.018752885 |
| H | 7.261461622  | 1.601333211  | 4.150613508 |
| H | 6.491147130  | -0.560840626 | 7.780889903 |
| H | 8.028913793  | 0.764001019  | 6.355836984 |
| C | 2.143598323  | -1.798527657 | 5.330739945 |
| C | 2.729227122  | -3.005405490 | 4.920189272 |
| C | 1.136712724  | -1.820869381 | 6.301382494 |
| C | 2.317074087  | -4.211211618 | 5.478270624 |
| H | 3.510232495  | -2.999676108 | 4.166312026 |
| C | 0.724511883  | -3.032193194 | 6.857464855 |
| H | 0.671604517  | -0.896844938 | 6.626062808 |
| C | 1.313814735  | -4.225741122 | 6.448816515 |
| H | 2.781403597  | -5.139757524 | 5.162070143 |
| H | -0.055092463 | -3.040023336 | 7.612119681 |
| H | 0.996151188  | -5.166338971 | 6.886713380 |
| C | 1.679890961  | 1.099661849  | 5.178925251 |
| C | 0.526548165  | 1.443465739  | 4.460645118 |
| C | 1.995588742  | 1.792182443  | 6.354432344 |
| C | -0.304064905 | 2.459002897  | 4.929804554 |
| H | 0.276424044  | 0.939176750  | 3.532526344 |
| C | 1.161482339  | 2.808683636  | 6.814659425 |
| H | 2.896292611  | 1.550888872  | 6.908076686 |
| C | 0.008670797  | 3.140272822  | 6.104979973 |
| H | -1.198287102 | 2.716966188  | 4.371658617 |
| H | 1.415134636  | 3.343707598  | 7.723655207 |
| H | -0.640313039 | 3.931919832  | 6.465256061 |

<sup>2</sup>P<sub>PO</sub>:

|    |              |              |              |
|----|--------------|--------------|--------------|
| Ni | -0.459741713 | 0.056760676  | -0.371439690 |
| O  | -0.794364485 | 0.491662466  | 1.472683988  |
| O  | 2.780713846  | -0.341622554 | 3.004148245  |
| N  | -0.968381496 | 2.076729464  | -0.918248502 |
| N  | 1.625130757  | 0.317830380  | -0.695485758 |
| N  | -0.000237460 | -2.033156788 | 0.030330711  |
| N  | -2.465920085 | -0.468196120 | -1.042211674 |
| C  | -3.095634916 | 0.823047796  | -1.442457990 |
| C  | -2.451710325 | 2.042874343  | -0.809621733 |
| C  | -0.454103733 | 2.270667493  | -2.297766649 |
| C  | 1.075386851  | 2.138196062  | -2.427761657 |
| C  | 1.720993269  | 0.777727403  | -2.111548576 |
| C  | -0.532667669 | 3.169988979  | -0.014891848 |
| C  | 2.191977401  | -1.058225279 | -0.520445275 |
| C  | 1.388818536  | -1.821901538 | 0.528704828  |
| C  | 2.355479584  | 1.221518091  | 0.230679309  |
| C  | -2.436918495 | -2.331659161 | 0.731298056  |
| C  | -3.046607271 | -1.008500661 | 0.230698381  |
| C  | 0.023209526  | -3.115333306 | -0.981647133 |
| C  | -0.951198275 | -2.366060769 | 1.132435677  |
| C  | -2.690501401 | -1.406713497 | -2.166177229 |
| H  | -4.166334974 | 0.817172053  | -1.201737551 |
| H  | -3.031075505 | 0.892180929  | -2.529515699 |
| H  | -2.889603841 | 2.946246312  | -1.257286762 |
| H  | -2.667837240 | 2.067907515  | 0.258267227  |
| H  | -0.755766680 | 3.257506881  | -2.678581424 |
| H  | -0.931147724 | 1.528233089  | -2.944555094 |
| H  | 1.579452384  | 2.930657336  | -1.871525020 |
| H  | 1.310495934  | 2.345613234  | -3.477273642 |
| H  | 1.260809637  | 0.004997682  | -2.738320294 |
| H  | 2.778849152  | 0.826530111  | -2.406507724 |
| H  | -1.107048086 | 4.082248074  | -0.218229423 |
| H  | 0.516036879  | 3.406607553  | -0.152677501 |
| H  | -0.693208322 | 2.856996491  | 1.015397182  |
| H  | 3.239679450  | -0.995907274 | -0.213192169 |
| H  | 2.173504042  | -1.571517870 | -1.483514574 |
| H  | 1.871876305  | -2.782512792 | 0.747550903  |
| H  | 1.362821325  | -1.253068835 | 1.456892903  |
| H  | 3.387826313  | 1.353246619  | -0.118625612 |

|   |              |              |              |
|---|--------------|--------------|--------------|
| H | 2.376803374  | 0.786494298  | 1.228878096  |
| H | 1.880548326  | 2.193325011  | 0.289035729  |
| H | -2.674232340 | -3.143336402 | 0.038232772  |
| H | -2.995222377 | -2.583009095 | 1.639626447  |
| H | -4.125954240 | -1.162620364 | 0.086247811  |
| H | -2.914370748 | -0.238165725 | 0.992641286  |
| H | -0.719960985 | -3.364814799 | 1.528573592  |
| H | -0.771833443 | -1.638958717 | 1.924409228  |
| H | -3.759486499 | -1.480675016 | -2.402768157 |
| H | -2.165355867 | -1.054551747 | -3.055272684 |
| H | -2.329781574 | -2.399672959 | -1.934001744 |
| H | -0.976295578 | -3.480410343 | -1.191542133 |
| H | 0.459172646  | -2.776074447 | -1.921052021 |
| H | 0.609992717  | -3.966751609 | -0.616860154 |
| P | 2.779289294  | -0.255401849 | 4.514909538  |
| C | 4.451768390  | 0.046812884  | 5.185067314  |
| C | 5.345327064  | 0.788289936  | 4.402397854  |
| C | 4.859917818  | -0.422552863 | 6.438965437  |
| C | 6.625032060  | 1.066968317  | 4.874585495  |
| H | 5.038660084  | 1.133865950  | 3.421128089  |
| C | 6.141894707  | -0.141892833 | 6.907965481  |
| H | 4.185904643  | -1.016390637 | 7.047333706  |
| C | 7.023339860  | 0.604718482  | 6.128441041  |
| H | 7.313460931  | 1.641007479  | 4.263079011  |
| H | 6.453663465  | -0.511800210 | 7.879006181  |
| H | 8.021685890  | 0.820443292  | 6.494490544  |
| C | 2.195017392  | -1.804928046 | 5.293947102  |
| C | 2.743020957  | -3.011473861 | 4.835034454  |
| C | 1.228338776  | -1.831291305 | 6.304296512  |
| C | 2.333312239  | -4.222178951 | 5.384668712  |
| H | 3.491597521  | -3.000639583 | 4.049315164  |
| C | 0.818375735  | -3.047199330 | 6.851670315  |
| H | 0.791485837  | -0.906947926 | 6.665290198  |
| C | 1.370282861  | -4.241234031 | 6.394782239  |
| H | 2.768297985  | -5.151243811 | 5.030663439  |
| H | 0.069355131  | -3.058835143 | 7.636518334  |
| H | 1.054337404  | -5.185696903 | 6.825585254  |
| C | 1.702953350  | 1.084518618  | 5.135851378  |
| C | 0.517394875  | 1.349369872  | 4.435520477  |
| C | 2.018763591  | 1.838269681  | 6.272664950  |
| C | -0.343115984 | 2.348813330  | 4.884458318  |
| H | 0.262389116  | 0.794454961  | 3.537545263  |
| C | 1.153993767  | 2.838674233  | 6.712841517  |
| H | 2.941772985  | 1.656480136  | 6.811989968  |
| C | -0.029473396 | 3.091889701  | 6.021965887  |
| H | -1.261978595 | 2.543440913  | 4.340804282  |
| H | 1.407453438  | 3.421140731  | 7.592386631  |
| H | -0.702635733 | 3.869814392  | 6.367702535  |
